# Supplementary material for: Domino ring-opening cyclization (DROC) of activated aziridines and epoxides with nitrones via dual-catalysis “on water”
Source: Royal Society of Chemistry journal article supplement (doi:10.1039/c7cc01033h), 2017-01-01
Supplement: c7cc01033h1.pdf [file c7cc01033h1.pdf]

# Domino Ring-Opening Cyclization (DROC) of Activated Aziridines and Epoxides with Nitrones via Dual-Catalysis “On Water”

Imtiyaz Ahmad Wani, Masthanvali Sayyad and Manas K. Ghorai\*

Department of Chemistry, Indian Institute of Technology, Kanpur 208016

E-mail: [mkggorai@iitk.ac.in](mailto:mkggorai@iitk.ac.in)

## Supporting Information

### Table of Contents

| SL No | Contents                                                               | Page No |
|-------|------------------------------------------------------------------------|---------|
| 1     | General experimental                                                   | 02      |
| 2     | X-ray crystal structures                                               | 03      |
| 3     | X-ray crystallographic analysis of <b>3a</b> , <b>6a</b> and <b>9a</b> | 05      |
| 4     | References                                                             | 07      |
| 5     | Spectral data                                                          | 09      |
| 6     | <sup>1</sup> H NMR and <sup>13</sup> C NMR spectra                     | 31      |
| 7     | HPLC chromatograms                                                     | 69      |

## 1. General experimental

Analytical thin layer chromatography (TLC) was carried out using silica gel 60 F<sub>254</sub> pre-coated plates. Visualization was accomplished with UV lamp or I<sub>2</sub> stain. Silica gel 230-400 mesh size were used for column chromatography using the combination of ethyl acetate and petroleum ether as an eluent. Unless noted, all reactions were carried out in oven-dried glassware under an atmosphere of nitrogen using anhydrous solvents. Where appropriate, solvents and all reagents were purified prior to use following the guidelines of Perrin and Armarego<sup>1</sup> and Vogel.<sup>2</sup> 2-aryl-1-tosylaziridines were prepared from different styrene derivatives following a reported procedure.<sup>3</sup> Chiral 2-phenyl-1-tosylaziridine<sup>4</sup> were prepared from corresponding amino alcohol following a reported procedure. All the nitrones (**2a-1**) were prepared following the reported procedure.<sup>5a,b,c</sup> All commercial reagents were used as received without prior purification unless mentioned. IR spectra were recorded in potassium bromide (KBr) pellet. Proton nuclear magnetic resonance (<sup>1</sup>H NMR) spectra were recorded at 500 MHz at the temperature of 55 °C. Chemical shifts were recorded in parts per million (ppm, δ) relative to tetramethyl silane (δ 0.00). <sup>1</sup>H NMR splitting patterns are designated as singlet (s), doublet (d), double doublet (dd), triplet (t), quartet (q) or multiplet (m). Carbon nuclear magnetic resonance (<sup>13</sup>C {<sup>1</sup>H} NMR) spectra were recorded at 125 MHz. Mass spectra (MS) were obtained using FAB and ESI mass spectrometer (TOF). Melting point was determined using a hot stage apparatus and are reported as uncorrected. Enantiomeric ratios (er) were determined by HPLC using Chiralcel OD-H, and Lux 5u Cellulose 2 analytical column (detection at 254 nm). Optical rotations were measured using a 6 mL cell with a 1.0 dm path length and are reported as  $[\alpha]_D^{25}$  (c in gm per 100 mL solvent) at 25 °C.

**General Experimental Procedure for the Synthesis of Oxadiazinane/ Dioxazinane.** A clean seal tube was charged with aziridine (0.100 mmol, 1.0 equiv.)/ epoxide (0.200 mmol, 1.0 equiv.), nitrene (0.150 mmol, 1.5 equiv.), anhydrous LiClO<sub>4</sub> (10 mol%) and quaternary ammonium salt Bu<sub>4</sub>NBF<sub>4</sub> (10 mol%) in water (2.0 mL). The reaction mixture was then stirred at 80 °C for appropriate time. After complete consumption of starting compound (monitored by TLC), the aqueous layer was extracted with ethyl acetate (3 × 10.0 mL) and dried over anhydrous Na<sub>2</sub>SO<sub>4</sub>. The crude product was purified by flash column chromatography on silica gel (230–400 mesh) using ethyl acetate in petroleum ether as the eluent to give the pure products.

## 2. X-ray crystal structures:

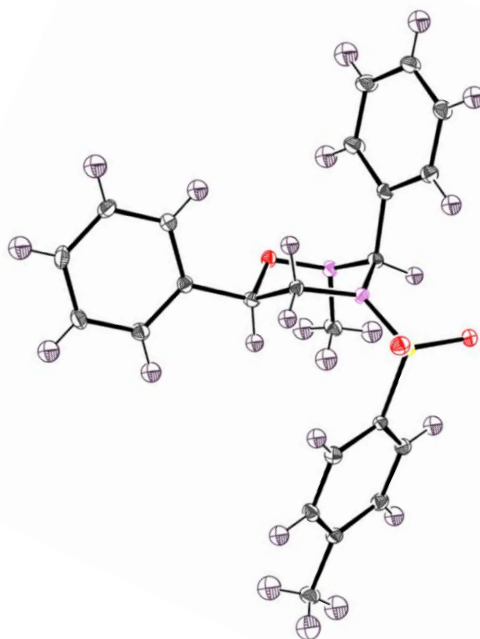

**Figure 1.** ORTEP diagram of compound **3a** (30% thermal ellipsoids)

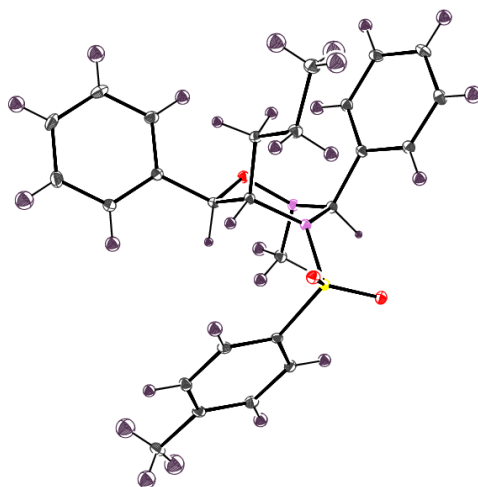

**Figure 2.** ORTEP diagram of compound **6a** (30% thermal ellipsoids)

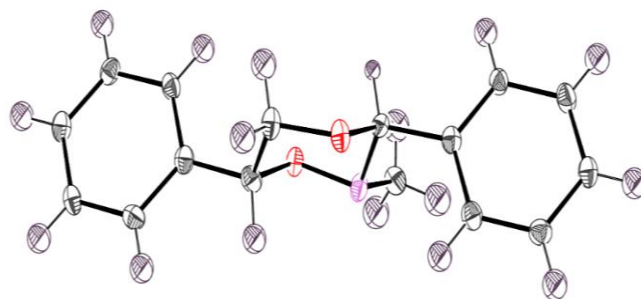

**Figure 3.** ORTEP diagram of compound **9a** (30% thermal ellipsoids)

### 3. X-ray crystallographic analysis of 3a, 6a and 9a:

The crystals used in the analyses were glued to a glass fiber and mounted on SMART APEX diffractometer. The instrument was equipped with CCD area detector and data were collected using graphite-monochromated Mo K $\alpha$  radiation ( $\lambda = 0.71069 \text{ \AA}$ ) at low temperature (100K). Cell constants were obtained from the least-squares refinement of three-dimensional centroids through the use of CCD recording of narrow  $\omega$  rotation frames, completing almost all-reciprocal space in the stated  $\theta$  range. All data were collected with SMART 5.628 and were integrated with the SAINT<sup>6</sup> program. An empirical absorption correction was applied to collect reflections with SADABS<sup>7</sup> using XPREP<sup>8</sup>. The structure was solved using SIR-97<sup>9</sup> and refined using SHELXL-97<sup>10</sup>. The space group of the compounds was determined based on the lack of systematic absence and intensity statistics. Full matrix least squares / difference Fourier cycles were performed which located the remaining non-hydrogen atoms. All non-hydrogen atoms were refined with anisotropic displacement parameters. All the hydrogen atoms are fixed by using geometrical constraints using idealized geometries and have been defined isotropically.

**Table 1.** Data collection and structure refinement parameters for **3a**, **6a** and **9a**.

| Compound                                 | <b>3a</b>                                                       | <b>6a</b>                                                       | <b>9a</b>                                       |
|------------------------------------------|-----------------------------------------------------------------|-----------------------------------------------------------------|-------------------------------------------------|
| Formula                                  | C <sub>23</sub> H <sub>24</sub> N <sub>2</sub> O <sub>3</sub> S | C <sub>26</sub> H <sub>30</sub> N <sub>2</sub> O <sub>3</sub> S | C <sub>16</sub> H <sub>17</sub> NO <sub>2</sub> |
| Formula weight                           | 408.50                                                          | 450.58                                                          | 255.31                                          |
| CCDC No.                                 | 1489202                                                         | 1518181                                                         | 1489201                                         |
| Crystal color, habit                     | White, block                                                    | White, Prism                                                    | White, block                                    |
| <i>T</i> / K                             | 100(2)                                                          | 100(2)                                                          | 100(2)                                          |
| Crystal system                           | Monoclinic                                                      | Triclinic                                                       | Monoclinic                                      |
| Space group                              | <i>P2<sub>1</sub>/n</i> (no. 14)                                | <i>P-1</i>                                                      | <i>P2<sub>1</sub></i> (no. 4)                   |
| <i>a</i> /Å                              | 9.9562(6)                                                       | 8.774(5)                                                        | 5.4942(17)                                      |
| <i>b</i> /Å                              | 12.5624(7)                                                      | 10.058(5)                                                       | 18.284(6)                                       |
| <i>c</i> /Å                              | 16.3026(10)                                                     | 14.512(5)                                                       | 6.781(2)                                        |
| <i>α</i> <sup>o</sup>                    | 90.00                                                           | 96.541(5)                                                       | 90.00                                           |
| <i>β</i> <sup>o</sup>                    | 92.165(2)                                                       | 105.912(5)                                                      | 103.824(5)                                      |
| <i>γ</i> <sup>o</sup>                    | 90.00                                                           | 108.607(5)                                                      | 90.00                                           |
| <i>V</i> /Å <sup>3</sup>                 | 2037.6(2)                                                       | 1138.4(9)                                                       | 661.5(4)                                        |
| <i>Z</i>                                 | 4                                                               | 2                                                               | 2                                               |
| <i>D<sub>c</sub></i> /g cm <sup>-3</sup> | 1.332                                                           | 1.315                                                           | 1.282                                           |
| <i>μ</i> /mm <sup>-1</sup>               | 0.186                                                           | 0.173                                                           | 0.084                                           |

|                                                                                                                          |                                       |                                       |                                       |
|--------------------------------------------------------------------------------------------------------------------------|---------------------------------------|---------------------------------------|---------------------------------------|
| Reflections measured                                                                                                     | 20220                                 | 17573                                 | 4022                                  |
| Unique reflections                                                                                                       | 3753                                  | 4399                                  | 2272                                  |
| Reflections used<br>$I > 2\sigma(I)$                                                                                     | 5051                                  | 5693                                  | 2817                                  |
| $R_1^a, wR_2^b [I > 2\sigma(I)]$                                                                                         | $R_1 = 0.0467^a$<br>$wR_2 = 0.1073^b$ | $R_1 = 0.0454^a$<br>$wR_2 = 0.1040^b$ | $R_1 = 0.0555^a$<br>$wR_2 = 0.1348^b$ |
| $R_1^a, wR_2^b(\text{all data})$                                                                                         | $R_1 = 0.0721^a$<br>$wR_2 = 0.1216^b$ | $R_1 = 0.0669^a$<br>$wR_2 = 0.1133^b$ | $R_1 = 0.0765^a$<br>$wR_2 = 0.1826^b$ |
| GOF on $F^2$                                                                                                             | 1.015                                 | 1.014                                 | 0.998                                 |
| $^a R_1 = \sum   F_o  -  F_c   / \sum  F_o $ . $^b wR_2 = \{\sum [w( F_o ^2 -  F_c ^2)^2] / \sum [w( F_o ^2)^2]\}^{1/2}$ |                                       |                                       |                                       |

#### 4. References.

1. D. D. Perrin, W. L. F. Armarego, In *Purification of Laboratory Chemicals*; Third Edition, Pergamon Press: Oxford, **1988**.
2. B. S. Furniss, A. J. Hannaford, P. W. G. Smith, A. R. Tatchell, In *Vogel's Textbook of Practical Organic Chemistry*; Fifth Edition, Longman Group, U.K. Ltd., **1989**.
3. J. U. Jeong, B. Tao, I. Sagasser, H. Henniges, K. B. Sharpless, *J. Am. Chem. Soc.* **1998**, *120*, 6844.
4. (a) M. Cernerud, H. Adolfsson, C. Moberg, *Tetrahedron: Asymm.* **1997**, *8*, 2655; (b) M. K. Ghorai, A. Kumar, D. P. Tiwari, *J. Org. Chem.* **2010**, *75*, 137.

5. (a) R. P. Stalin, S. Vipender, E. Lars, S. Nicklas, *Org. Lett.* **2015**, *17*, 4506; (b) O. Bortolini, I. Mulani, A. De Nino, L. Maiuolo, M. Nardi, B. Russo, S. Avnet, *Tetrahedron* **2011**, *67*, 5635; (c) M. Zhong, S. Sun, J. Cheng, Y. Shao, *J. Org. Chem.*, **2016**, *81*, 10825.
6. SAINT+ 6.02ed.; Bruker AXS, Madison, WI, **1999**.
7. Sheldrick, G. M. SADABS, Empirical Absorption Correction Program, University of Göttingen, Göttingen, Germany, 1997.
8. XPREP, 5.1ed. Siemens Industrial Automation Inc., Madison, WI, **1995**.
9. A. Altomare, M. C. Burla, M. Camalli, G. L. Cascarano, C. Giacovazzo, A. Guagliardi, A. G. G. Moliterni, G. Polidori, R. Spagna, *J. Appl. Cryst.* **1999**, *32*, 115.
10. Sheldrick, G. M. SHELXL-97: Program for Crystal Structure Refinement (University of Göttingen, Göttingen, Germany, **1997**).



## 5. Spectral Data:

**2-Methyl-3,6-diphenyl-4-tosyl-1,2,4-oxadiazinane (3a).** The general method described above was followed when aziridine **1a** (27.3 mg, 0.100 mmol) was reacted with nitron **2a** (20.5 mg, 0.150 mmol) in presence of LiClO<sub>4</sub> (10 mol%) and Bu<sub>4</sub>NBF<sub>4</sub> (10 mol%) at 80 °C for 30 minutes to afford **3a** (35.9 mg, 0.088 mmol) as a white solid in 88% yield: *R<sub>f</sub>* 0.7 (10 % ethyl acetate in petroleum ether), mp 124–126 °C; IR  $\nu_{\text{max}}$  (KBr, cm<sup>-1</sup>) 2924, 1597, 1493, 1449, 1341, 1159, 1106, 1089, 952, 814, 736, 698, 672, 615, 545; <sup>1</sup>H NMR (500 MHz, CDCl<sub>3</sub>)  $\delta$  2.41 (s, 3H), 2.87 (s, 3H), 3.18 (t, *J* = 12.0 Hz, 1H), 3.69 (dd, *J* = 13.7, 3.4 Hz, 1H), 5.02 (dd, *J* = 11.2, 3.0 Hz, 1H), 5.81 (s, 1H), 7.18 (d, *J* = 7.5 Hz, 2H), 7.25–7.34 (m, 8H), 7.56 (d, *J* = 6.9 Hz, 2H), 7.70 (d, *J* = 8.6 Hz, 2H); <sup>13</sup>C NMR (125 MHz, CDCl<sub>3</sub>)  $\delta$  21.4, 41.1, 45.5, 72.4, 75.0, 126.5, 127.3, 128.2, 128.4, 128.5, 128.6, 128.7, 129.0, 129.7, 136.7, 137.7, 143.5; HRMS (ESI) calcd for C<sub>23</sub>H<sub>24</sub>N<sub>2</sub>O<sub>3</sub>S (M+H)<sup>+</sup> 409.1586, found 409.1581.

**4-Methyl-N-(2-oxo-2-phenylethyl)benzenesulfonamide (4a).** white solid, mp 122–124 °C; IR  $\nu_{\text{max}}$  (KBr, cm<sup>-1</sup>) 3280, 2923, 2852, 1687, 1596, 1580, 1493, 1449, 1412, 1345, 1325, 1234, 1185, 1160, 1092, 1021, 987, 930, 817, 758, 672, 651, 547; <sup>1</sup>H NMR (500 MHz, CDCl<sub>3</sub>)  $\delta$  2.38 (s, 3H), 4.45 (d, *J* = 4.5 Hz, 2H), 5.64 (t, *J* = 4.5 Hz, 1H), 7.25 (s, 1H), 7.27 (d, *J* = 7.5 Hz, 2H), 7.45 (t, *J* = 8.0 Hz, 2H), 7.59 (t, *J* = 7.4 Hz, 1H), 7.77 (d, *J* = 8.0 Hz, 2H), 7.85 (d, *J* = 8.3 Hz, 2H); <sup>13</sup>C NMR (125 MHz, CDCl<sub>3</sub>)  $\delta$  21.5, 48.7, 127.2, 127.9, 129.0, 129.9, 133.8, 134.4, 136.2, 143.8, 192.6; HRMS (ESI) calcd for C<sub>15</sub>H<sub>15</sub>NO<sub>3</sub>S (M+H)<sup>+</sup> 290.0851, found 290.0859.

**6-(2-Bromophenyl)-2-methyl-3-phenyl-4-tosyl-1,2,4-oxadiazinane (3b).** The general method described above was followed when aziridine **1b** (35.2 mg, 0.100 mmol) was reacted with nitron **2a** (20.5 mg, 0.150 mmol) in presence of LiClO<sub>4</sub> (10 mol%) and Bu<sub>4</sub>NBF<sub>4</sub> (10 mol%) at 80 °C for

45 minutes to afford **3b** ( 38.96 mg, 0.080 mmol) as a gummy liquid in 80% yield:  $R_f$  0.7 (10 % ethyl acetate in petroleum ether); IR  $\nu_{\max}$  (KBr,  $\text{cm}^{-1}$ ) 2956, 2924, 2853, 1742, 1641, 1597, 1493, 1464, 1377, 1345, 1304, 1261, 1186, 1162, 1099, 1020, 989, 961, 910, 861, 861, 751, 698, 671, 613, 589, 558, 542;  $^1\text{H}$  NMR (500 MHz,  $\text{CDCl}_3$ )  $\delta$  2.43 (s, 3H), 2.84 (s, 3H), 3.08 (t,  $J = 12.6$  Hz, 1H), 3.95 (dd,  $J = 13.7, 4.2$  Hz, 1H), 5.32 (dd,  $J = 10.3, 3.4$  Hz, 1H), 5.77 (s, 1H), 7.10 (t,  $J = 8.5$  Hz, 1H), 7.19–7.37 (m, 7H), 7.48 (d,  $J = 8.0$  Hz, 1H), 7.63 (d,  $J = 7.4$  Hz, 2H), 7.81 (d,  $J = 8.0$  Hz, 2H);  $^{13}\text{C}$  NMR (125 MHz,  $\text{CDCl}_3$ )  $\delta$  21.5, 41.1, 44.1, 71.4, 76.3, 122.1, 127.5, 127.8, 128.2, 128.4, 128.5, 129.7, 129.8, 132.3, 132.8, 136.8, 137.4, 137.8, 143.6; HRMS (ESI) calcd for  $\text{C}_{23}\text{H}_{24}\text{BrN}_2\text{O}_3\text{S}$  ( $\text{M}+\text{H}$ ) $^+$  487.0691, found 487.0694.

**6-(4-Fluorophenyl)-2-methyl-3-phenyl-4-tosyl-1,2,4-oxadiazinane (3c).** The general method described above was followed, when aziridine **1c** (29.1 mg, 0.100 mmol) was reacted with nitrone **2a** (20.5 mg, 0.150 mmol) in presence of  $\text{LiClO}_4$  (10 mol%) and  $\text{Bu}_4\text{NBF}_4$  (10 mol%) at 80 °C for 35 minutes to afford **3c** ( 35.86 mg, 0.084 mmol) as a viscous liquid in 84% yield:  $R_f$  0.6 (10 % ethyl acetate in petroleum ether); IR  $\nu_{\max}$  (KBr,  $\text{cm}^{-1}$ ) 3708, 3526, 3017, 2849, 2881, 1635, 1488, 1124, 1103, 1029, 830, 568;  $^1\text{H}$  NMR (500 MHz,  $\text{CDCl}_3$ )  $\delta$  2.42 (s, 3H), 2.89 (s, 3H), 3.15 (t,  $J = 12.0$  Hz, 1H), 3.66 (dd,  $J = 13.7, 4.2$  Hz, 1H), 5.0 (dd,  $J = 10.2, 2.3$  Hz, 1H), 5.8 (s, 1H), 6.96 (t,  $J = 8.6$  Hz, 2H), 7.04 (t,  $J = 8.6$  Hz, 1H), 7.14 (t,  $J = 5.7$  Hz, 2H), 7.27 (d,  $J = 8.0$  Hz, 1H), 7.30–7.37 (m, 3H), 7.53 (d,  $J = 6.3$  Hz, 2H), 7.69 (d,  $J = 8.6$  Hz, 2H);  $^{13}\text{C}$  NMR (125 MHz,  $\text{CDCl}_3$ )  $\delta$  21.6, 40.0, 45.4, 71.2, 73.3, 115.5, 115.6, 115.7, 115.8, 127.2, 127.3, 127.7, 127.8, 128.2, 128.4, 128.6, 129.0, 129.8, 134.5, 136.2, 136.5, 137.4, 143.6, 143.7, 161.7, 161.8, 163.4, 163.8; HRMS (ESI) calcd for  $\text{C}_{23}\text{H}_{24}\text{FN}_2\text{O}_3\text{S}$  ( $\text{M}+\text{H}$ ) $^+$  427.1492, found 427.1493.

**6-(4-Chlorophenyl)-2-methyl-3-phenyl-4-tosyl-1,2,4-oxadiazinane (3d).** The general method described above was followed when aziridine **1d** (30.7 mg, 0.100 mmol) was reacted with nitrone **2a** (20.5 mg, 0.150 mmol) in presence of LiClO<sub>4</sub> (10 mol%) and Bu<sub>4</sub>NBF<sub>4</sub> (10 mol%) at 80 °C for 30 minutes to afford **3d** (39.8 mg, 0.090 mmol) as a gummy liquid in 90% yield: *R<sub>f</sub>* 0.7 (10 % ethyl acetate in petroleum ether); IR  $\nu_{\max}$  (KBr, cm<sup>-1</sup>) 3061, 2924, 2853, 1598, 1492, 1449, 1405, 1342, 1305, 1161, 1111, 1090, 1065, 1015, 988, 958, 913, 868, 814, 741, 700, 671, 621, 589, 557, 542; <sup>1</sup>H NMR (500 MHz, CDCl<sub>3</sub>)  $\delta$  2.41 (s, 3H), 2.86 (s, 3H), 3.15 (t, *J* = 11.8 Hz, 1H), 3.69 (dd, *J* = 14.0, 4.2 Hz, 1H), 5.0 (dd, *J* = 10.8, 3.4 Hz, 1H), 5.78 (s, 1H), 7.12 (d, *J* = 8.3 Hz, 2H), 7.26 (d, *J* = 8.3 Hz, 4H), 7.30–7.35 (m, 3H), 7.52 (d, *J* = 6.7 Hz, 2H), 7.69 (d, *J* = 8.2 Hz, 2H); <sup>13</sup>C NMR (125 MHz, CDCl<sub>3</sub>)  $\delta$  20.1, 40.0, 44.3, 70.7, 75.0, 126.2, 126.8, 127.2, 127.4, 127.5, 127.8, 128.7, 133.5, 135.4, 135.5, 136.6, 142.6; HRMS (ESI) calcd for C<sub>23</sub>H<sub>23</sub>ClN<sub>2</sub>O<sub>3</sub>S (M+H)<sup>+</sup> 443.1196, found 443.1195.

**6-(4-Bromophenyl)-2-methyl-3-phenyl-4-tosyl-1,2,4-oxadiazinane (3e).** The general method described above was followed when aziridine **1e** (35.2 mg, 0.100 mmol) was reacted with nitrone **2a** (20.5 mg, 0.150 mmol) in presence of LiClO<sub>4</sub> (10 mol%) and Bu<sub>4</sub>NBF<sub>4</sub> (10 mol%) at 80 °C for 30 minutes to afford **3e** (40.90 mg, 0.083 mmol) as a thick liquid in 83% yield: *R<sub>f</sub>* 0.8 (10 % ethyl acetate in petroleum ether); IR  $\nu_{\max}$  (KBr, cm<sup>-1</sup>) 3442, 3062, 2956, 2924, 2854, 1739, 1597, 1490, 1454, 1403, 1341, 1304, 1262, 1161, 1110, 1088, 1070, 989, 959, 912, 866, 740, 699, 675, 616, 589, 577, 521; <sup>1</sup>H NMR (500 MHz, CDCl<sub>3</sub>)  $\delta$  2.41 (s, 3H), 2.86 (s, 3H), 3.15 (t, *J* = 12.0 Hz, 1H), 3.98 (dd, 10.8, 3.4 Hz, 1H), 4.98 (dd, *J* = 10.3, 4.6 Hz, 1H), 5.77 (s, 1H), 7.06 (d, *J* = 8.6 Hz, 2H), 7.29 (d, *J* = 8.0 Hz, 2H), 7.29–7.33 (m, 3H), 7.42 (d, *J* = 8.6 Hz, 2H), 7.52 (dd, *J* = 10.8, 4.6 Hz, 2H), 7.68 (d, *J* = 8.0 Hz, 2H); <sup>13</sup>C NMR (125 MHz, CDCl<sub>3</sub>)  $\delta$  16.7, 36.3, 40.51, 67.0, 71.4, 117.8,

122.5, 123.4, 123.5, 123.7, 124.9, 127.0, 131.8, 132.1, 132.9, 137.8, 138.8; HRMS (ESI) calcd for  $C_{23}H_{24}BrN_2O_3S$  (M+H)<sup>+</sup> 487.0691, found 487.0692.

**6-(3-bromophenyl)-2-methyl-3-phenyl-4-tosyl-1,2,4-oxadiazinane (3f).** The general method described above was followed when aziridine **1f** (35.2 mg, 0.100 mmol) was reacted with nitrone **2a** (20.5 mg, 0.150 mmol) in presence of LiClO<sub>4</sub> (10 mol%) and Bu<sub>4</sub>NBF<sub>4</sub> (10 mol%) at 80 °C for 30 minutes to afford **3f** ( 41.8 mg, 0.086 mmol) as a gummy liquid in 86% yield: *R<sub>f</sub>* 0.8 (10 % ethyl acetate in petroleum ether); IR  $\nu_{max}$  (KBr, cm<sup>-1</sup>) 3442, 3062, 2923, 2853, 1597, 1570, 1493, 1449, 1428, 1342, 1305, 1261, 1198, 1190, 1160, 1071, 1018, 997, 918, 881, 862, 741, 695, 615, 592, 545: <sup>1</sup>H NMR (500 MHz, CDCl<sub>3</sub>)  $\delta$  2.44 (s, 3H), 2.86 (s, 3H), 3.21 (t, *J* = 12.0 Hz, 1H), 3.76 (dd, *J* = 14.0, 3.4 Hz, 1H), 5.02 (dd, *J* = 10.8, 2.8 Hz, 1H), 5.80 (s, 1H), 7.13–7.20 (m, 2H), 7.25–7.38 (m, 7H), 7.43 (d, *J* = 5.0 Hz, 2H), 7.56 (d, *J* = 8.6 Hz, 2H), 7.71 (d, *J* = 8.0 Hz, 2H); <sup>13</sup>C NMR (125 MHz, CDCl<sub>3</sub>)  $\delta$  21.4, 41.2, 45.3, 71.8, 76.3, 122.7, 124.7, 127.3, 128.2, 128.4, 128.5, 129.6, 129.7, 130.2, 131.6, 136.5, 137.6, 140.2, 143.6; HRMS (ESI) calcd for  $C_{23}H_{24}BrN_2O_3S$  (M+H)<sup>+</sup> 487.0691, found 487.0683.

**6-(2-Fluorophenyl)-2-methyl-3-phenyl-4-tosyl-1,2,4-oxadiazinane (3g).** The general method described above was followed when aziridine **1g** (29.1 mg, 0.100 mmol) was reacted with nitrone **2a** (20.5 mg, 0.150 mmol) in presence of LiClO<sub>4</sub> (10 mol%) and Bu<sub>4</sub>NBF<sub>4</sub> (10 mol%) at 80 °C for 35 minutes to afford **3g** ( 36.3 mg, 0.085 mmol) as a gummy liquid in 85% yield: *R<sub>f</sub>* 0.7 (10 % ethyl acetate in petroleum ether); IR  $\nu_{max}$  (KBr, cm<sup>-1</sup>) 3848, 3416, 2917, 2849, 1634, 1491, 1456, 1161, 1089, 670: <sup>1</sup>H NMR (500 MHz, CDCl<sub>3</sub>)  $\delta$  2.42 (s, 3H), 2.81 (s, 3H), 3.24 (t, *J* = 11.9 Hz, 1H), 3.82 (dd, *J* = 13.8, 3.6 Hz, 1H), 5.27 (dd, *J* = 11.0, 3.0 Hz, 1H), 5.77 (s, 1H), 6.99 (t, *J* = 8.7 Hz, 1H), 7.06 (t, *J* = 7.0, 1H), 7.23–7.35 (m, 7H), 7.61 (d, *J* = 7.2 Hz, 2H), 7.75 (d, *J* = 8.0 Hz,

2H);  $^{13}\text{C}$  NMR (125 MHz,  $\text{CDCl}_3$ )  $\delta$ 21.5, 41.1, 44.5, 66.9, 76.4, 115.3, 115.5, 124.5, 127.4, 127.8, 128.2, 128.5, 129.7, 129.8, 136.7, 137.9, 143.6; HRMS (ESI) calcd for  $\text{C}_{23}\text{H}_{24}\text{FN}_2\text{O}_3\text{S}$  ( $\text{M}+\text{H}$ ) $^+$  427.1492, found 427.1490.

**6-(3-Chlorophenyl)-2-methyl-3-phenyl-4-tosyl-1,2,4-oxadiazinane (3h).** The general method described above was followed when aziridine **1h** (30.7 mg, 0.100 mmol) was reacted with nitrone **2a** (20.5 mg, 0.150 mmol) in presence of  $\text{LiClO}_4$  (10 mol%) and  $\text{Bu}_4\text{NBF}_4$  (10 mol%) at 80 °C for 30 minutes to afford **3h** (33.6 mg, 0.076 mmol) as a gummy liquid in 76% yield:  $R_f$  0.7 (10 % ethyl acetate in petroleum ether); IR  $\nu_{\text{max}}$  (KBr,  $\text{cm}^{-1}$ ) 3063, 2924, 2854, 1738, 1599, 1575, 1494, 1449, 1432, 1342, 1305, 1203, 1161, 1107, 1090, 1064, 1018, 988, 958, 865, 862, 814, 784, 743, 695, 616, 593, 546;  $^1\text{H}$  NMR (500 MHz,  $\text{CDCl}_3$ )  $\delta$ 2.41 (s, 3H), 2.86 (s, 3H), 3.17 (t,  $J = 11.5$  Hz, 1H), 3.72 (dd,  $J = 13.2, 3.5$  Hz, 1H), 4.99 (d,  $J = 9.2$  Hz, 1H), 5.77 (s, 1H), 7.07 (d,  $J = 6.8$  Hz, 1H), 7.19 (s, 1H), 7.22–7.27 (m, 4H), 7.31–7.36 (m, 3H), 7.53 (d,  $J = 4.6$  Hz, 2H), 7.69 (d,  $J = 8.0$  Hz, 2H);  $^{13}\text{C}$  NMR (125 MHz,  $\text{CDCl}_3$ )  $\delta$ 21.5, 41.2, 45.3, 72.0, 76.3, 124.5, 126.6, 127.3, 128.3, 128.4, 128.5, 128.6, 129.7, 130.0, 134.7, 136.5, 137.7, 140.0, 143.7; HRMS (ESI) calcd for  $\text{C}_{23}\text{H}_{23}\text{ClN}_2\text{O}_3\text{S}$  ( $\text{M}+\text{H}$ ) $^+$  443.1196, found 443.1190.

**2-Methyl-3-phenyl-6-(m-tolyl)-4-tosyl-1,2,4-oxadiazinane (3i).** The general method described above was followed when aziridine **1i** (29.7 mg, 0.100 mmol) was reacted with nitrone **2a** (20.5 mg, 0.150 mmol) in presence of  $\text{LiClO}_4$  (10 mol%) and  $\text{Bu}_4\text{NBF}_4$  (10 mol%) at 80 °C for 30 minutes to afford **3i** (36.8 mg, 0.087 mmol) as a gummy liquid in 87% yield:  $R_f$  0.7 (10 % ethyl acetate in petroleum ether); IR  $\nu_{\text{max}}$  (KBr,  $\text{cm}^{-1}$ ) 2924, 1597, 1493, 1449, 1341, 1159, 1106, 1089, 952, 814, 736, 698, 672, 615, 545;  $^1\text{H}$  NMR (500 MHz,  $\text{CDCl}_3$ )  $\delta$ 2.30 (s, 3H), 2.42 (s, 3H), 2.89 (s, 3H), 3.19 (t,  $J = 12.6$  Hz, 1H), 3.70 (dd,  $J = 13.2, 3.5$  Hz, 1H), 5.0 (dd,  $J = 10.9, 2.9$  Hz, 1H),

5.82 (s, 1H), 6.98 (d,  $J = 8.0$  Hz, 2H), 7.09 (d,  $J = 7.5$  Hz, 1H), 7.18 (t,  $J = 7.5$  Hz, 1H), 7.27 (d,  $J = 8.0$  Hz, 2H), 7.34 (m, 3H), 7.58 (d,  $J = 6.9$  Hz, 2H), 7.71 (d,  $J = 8.0$  Hz, 2H);  $^{13}\text{C}$  NMR (125 MHz,  $\text{CDCl}_3$ )  $\delta$ 21.5, 21.6, 41.1, 45.4, 72.1, 75.7, 123.6, 127.3, 127.6, 127.9, 128.2, 128.5, 128.55, 128.6, 129.2, 129.4, 129.8, 136.4, 137.5, 138.3, 143.6; HRMS (ESI) calcd for  $\text{C}_{24}\text{H}_{26}\text{N}_2\text{O}_3\text{S}$  ( $\text{M}+\text{H}$ ) $^+$  423.1742, found 423.1741.

**2-Methyl-3-phenyl-4-tosyl-6-(3-(trifluoromethyl)phenyl)-1,2,4-oxadiazinane (3j).** The general method described above was followed when aziridine **1j** (34.1 mg, 0.100 mmol) was reacted with nitrone **2a** (20.5 mg, 0.150 mmol) in presence of  $\text{LiClO}_4$  (10 mol%) and  $\text{Bu}_4\text{NBF}_4$  (10 mol%) at 80 °C for 35 minutes to afford **3j** (36.6 mg, 0.082 mmol) as a gummy liquid in 82% yield:  $R_f$  0.7 (10 % ethyl acetate in petroleum ether); IR  $\nu_{\text{max}}$  (KBr,  $\text{cm}^{-1}$ ) 2956, 2854, 1733, 1598, 1493, 1450, 1405, 1327, 1197, 1163, 1127, 1092, 1073, 1019, 989, 957, 907, 837, 812, 762, 739, 701, 673, 613, 587, 554;  $^1\text{H}$  NMR (500 MHz,  $\text{CDCl}_3$ )  $\delta$ 2.40 (s, 3H), 2.88 (s, 3H), 3.20 (t,  $J = 12.6$  Hz, 1H), 3.76 (dd,  $J = 14.9, 4.6$  Hz, 1H), 5.08 (dd,  $J = 11.5, 4.6$  Hz, 1H), 5.79 (s, 1H), 7.26 (d,  $J = 8.0$  Hz, 2H), 7.32–7.34 (m, 3H), 7.37–7.43 (m, 2H), 7.46 (s, 1H), 7.51–7.54 (m, 3H), 7.69 (d,  $J = 8.0$  Hz, 2H);  $^{13}\text{C}$  NMR (125 MHz,  $\text{CDCl}_3$ )  $\delta$ 21.4, 41.1, 45.2, 71.6, 75.4, 114.0, 123.5, 125.3, 127.3, 128.2, 128.3, 128.4, 128.5, 129.1, 129.7, 129.8, 131.0, 136.5, 137.6, 143.7; HRMS (ESI) calcd for  $\text{C}_{24}\text{H}_{23}\text{F}_3\text{N}_2\text{O}_3\text{S}$  ( $\text{M}+\text{H}$ ) $^+$  477.1460, found 477.1468.

**2-Methyl-3-phenyl-4-tosyl-6-(2-(trifluoromethyl)phenyl)-1,2,4-oxadiazinane (3k).** The general method described above was followed when aziridine **1k** (34.1 mg, 0.100 mmol) was reacted with nitrone **2a** (20.5 mg, 0.150 mmol) in presence of  $\text{LiClO}_4$  (10 mol%) and  $\text{Bu}_4\text{NBF}_4$  (10 mol%) at 80 °C for 45 minutes to afford **3k** (31.7 mg, 0.071 mmol) as a gummy liquid in 71% yield:  $R_f$  0.6 (10 % ethyl acetate in petroleum ether); IR  $\nu_{\text{max}}$  (KBr,  $\text{cm}^{-1}$ ) 3064, 2956, 2924, 2854, 1919, 1744,

1641, 1598, 1492, 1454, 1402, 1350, 1314, 1289, 1261, 1164, 1121, 1096, 1056, 1034, 1019, 987, 933, 913, 864, 815, 770, 739, 715, 698, 644, 616, 588, 558, 542, 525:  $^1\text{H}$  NMR (500 MHz,  $\text{CDCl}_3$ )  $\delta$  2.44 (s, 3H), 2.81 (s, 3H), 3.19 (t,  $J = 11.4$  Hz, 1H), 3.77 (dd,  $J = 13.8, 2.9$  Hz, 1H), 5.35 (dd,  $J = 12.6, 3.8$  Hz, 1H), 5.78 (s, 1H), 7.31–7.40 (m, 7H), 7.44 (t,  $J = 7.5$  Hz, 1H), 7.56 (d,  $J = 7.5$  Hz, 1H), 7.66 (d,  $J = 7.5$  Hz, 2H), 7.79 (d,  $J = 8.0$  Hz, 2H);  $^{13}\text{C}$  NMR (125 MHz,  $\text{CDCl}_3$ )  $\delta$  21.5, 40.8, 45.7, 67.3, 75.4, 123.0, 125.2, 125.7, 127.4, 128.2, 128.3, 128.5, 128.6, 129.8, 132.3, 136.5, 136.9, 137.7, 143.7; HRMS (ESI) calcd for  $\text{C}_{24}\text{H}_{23}\text{F}_3\text{N}_2\text{O}_3\text{S}$  ( $\text{M}+\text{H}$ ) $^+$  477.1460, found 477.1450.

**2-Methyl-6-(4-nitrophenyl)-3-phenyl-4-tosyl-1,2,4-oxadiazinane (3l).** The general method described above was followed when aziridine **1l** (31.8 mg, 0.100 mmol) was reacted with nitrone **2a** (20.5 mg, 0.150 mmol) in presence of  $\text{LiClO}_4$  (10 mol%) and  $\text{Bu}_4\text{NBF}_4$  (10 mol%) at 80 °C for 45 minutes to afford **3l** (32.6 mg, 0.072 mmol) as a gummy liquid in 72% yield:  $R_f$  0.6 (10% ethyl acetate in petroleum ether); IR  $\nu_{\text{max}}$  (KBr,  $\text{cm}^{-1}$ ) 2957, 2924, 2853, 1736, 1600, 1522, 1493, 1449, 1401, 1347, 1305, 1261, 1161, 1088, 1066, 1016, 989, 960, 913, 852, 814, 744, 698, 671, 615, 558, 542:  $^1\text{H}$  NMR (500 MHz,  $\text{CDCl}_3$ )  $\delta$  2.40 (s, 3H), 2.87 (s, 3H), 3.18 (t,  $J = 12.6$  Hz, 1H), 3.80 (dd,  $J = 17.2, 4.0$  Hz, 1H), 5.13 (dd,  $J = 11.2, 4.0$  Hz, 1H), 5.78 (s, 1H), 7.26 (d,  $J = 8.0$  Hz, 2H), 7.29–7.33 (m, 3H), 7.38 (d,  $J = 8.6$  Hz, 2H), 7.49 (d,  $J = 4.0$  Hz, 2H), 7.68 (d,  $J = 8.0$  Hz, 2H), 8.14 (d,  $J = 14.3$  Hz, 2H);  $^{13}\text{C}$  NMR (125 MHz,  $\text{CDCl}_3$ )  $\delta$  21.5, 41.2, 45.7, 72.0, 76.5, 123.8, 127.2, 127.3, 128.3, 128.4, 128.5, 129.8, 136.4, 137.5, 143.8, 145.2, 148.0; HRMS (ESI) calcd for  $\text{C}_{23}\text{H}_{23}\text{N}_3\text{O}_5\text{S}$  ( $\text{M}+\text{H}$ ) $^+$  454.1437, found 454.1430.

**(3S,6S)-2-Methyl-3,6-diphenyl-4-(phenylsulfonyl)-1,2,4-oxadiazinane (3m).** The general method described above was followed when (*R*)-**1m** (25.9 mg, 0.100 mmol) was reacted with nitrone **2a** (20.5 mg, 0.150 mmol) in presence of  $\text{LiClO}_4$  (10 mol%) and  $\text{Bu}_4\text{NBF}_4$  (10 mol%) at 80 °C for 30

minutes to afford **3m** ( 35.1 mg, 0.089 mmol) as a gummy liquid in 89% yield:  $R_f$  0.7 (10 % ethyl acetate in petroleum ether); IR  $\nu_{\max}$  (KBr,  $\text{cm}^{-1}$ ) 3449, 3062, 3031, 2923, 1602, 1494, 1447, 1345, 1311, 1165, 1103, 1088, 1029, 988, 957, 910, 866, 806, 741, 719, 697, 652, 638, 578, 548, 519, :  $^1\text{H}$  NMR (500 MHz,  $\text{CDCl}_3$ )  $\delta$  2.87 (s, 3H), 3.23 (t,  $J = 12.6$  Hz, 1H), 3.75 (dd,  $J = 13.7, 2.8$  Hz, 1H), 5.02 (dd,  $J = 12.6, 3.4$  Hz, 1H), 5.79 (s, 1H), 7.19 (d,  $J = 8.0$  Hz, 2H), 7.28–7.31 (m, 5H), 7.46 (t,  $J = 7.4$  Hz, 2H), 7.53–7.56 (m, 3H), 7.80 (d,  $J = 8.0$  Hz, 2H);  $^{13}\text{C}$  NMR (125 MHz,  $\text{CDCl}_3$ )  $\delta$  41.0, 45.5, 72.5, 76.1, 126.5, 127.2, 127.9, 128.2, 128.4, 128.5, 128.6, 129.0, 132.7, 136.5, 137.8, 140.7; HRMS (ESI) calcd for  $\text{C}_{22}\text{H}_{23}\text{N}_2\text{O}_3\text{S}$  ( $\text{M}+\text{H}$ ) $^+$  395.1429, found 395.1415.  $[\alpha]_{\text{D}}^{25} = 79.26$  (c 0.16,  $\text{CHCl}_3$ ) for a 99% ee sample. The enantiomeric excess was determined by chiral HPLC analysis (OD-H column), n-hexane/*i*-propanol = 95:5, flow rate = 1 mL/min,  $t_R$  (1) = 10.22 min (minor),  $t_R$  (2) = 14.49 min (major).

**4-(Mesitylsulfonyl)-2-methyl-3,6-diphenyl-1,2,4-oxadiazinane (3n).** The general method described above was followed when aziridine **1n** (30.1 mg, 0.100 mmol) was reacted with nitrone **2a** (20.5 mg, 0.150 mmol) in presence of  $\text{LiClO}_4$  (10 mol%) and  $\text{Bu}_4\text{NBF}_4$  (10 mol%) at 80 °C for 35 minutes to afford **3n** ( 37.1 mg, 0.085 mmol) as a gummy liquid in 85% yield:  $R_f$  0.7 (10 % ethyl acetate in petroleum ether); IR  $\nu_{\max}$  (KBr,  $\text{cm}^{-1}$ ) 3051, 2824, 2822, 1588, 1492, 1455, 1407, 1332, 1305, 1261, 1141, 1070, 1075, 1025, 978, 958, 913, 868, 814, 741, 710, 671, 621, 589, 542:  $^1\text{H}$  NMR (500 MHz,  $\text{CDCl}_3$ )  $\delta$  2.28 (s, 3H), 2.57 (s, 6H), 2.87 (s, 3H), 3.37–3.40 (m, 1H), 3.71 (dd,  $J = 14.9, 3.4$  Hz, 1H), 5.25 (dd,  $J = 10.8, 4.1$  Hz, 1H), 5.61 (s, 1H), 6.91 (d,  $J = 8.2$  Hz, 2H), 7.26–7.35 (m, 8H), 7.45 (d,  $J = 6.8$  Hz, 2H);  $^{13}\text{C}$  NMR (125 MHz,  $\text{CDCl}_3$ )  $\delta$  20.8, 22.2, 23.1, 41.4, 45.0, 74.5, 76.2, 126.5, 127.4, 128.3, 128.4, 128.7, 129.8, 131.4, 132.1, 133.6, 136.4, 140.1, 142.6; HRMS (ESI) calcd for  $\text{C}_{25}\text{H}_{28}\text{N}_2\text{O}_3\text{S}$  ( $\text{M}+\text{H}$ ) $^+$  437.1899, found 437.1895.



**4-((4-Methoxyphenyl)sulfonyl)-2-methyl-3,6-diphenyl-1,2,4-oxadiazinane (3o).** The general method described above was followed when aziridine **1o** (28.9 mg, 0.100 mmol) was reacted with nitrene **2a** (20.5 mg, 0.150 mmol) in presence of LiClO<sub>4</sub> (10 mol%) and Bu<sub>4</sub>NBF<sub>4</sub> (10 mol%) at 80 °C for 35 minutes to afford **3o** (33.1 mg, 0.078 mmol) as a gummy liquid in 78% yield: *R<sub>f</sub>* 0.7 (10 % ethyl acetate in petroleum ether); IR  $\nu_{\text{max}}$  (KBr, cm<sup>-1</sup>) 3062, 2925, 1700, 1596, 1578, 1496, 1454, 1413, 1308, 1260, 1179, 1155, 1102, 1090, 1060, 1026, 987, 956, 865, 743, 698, 675, 612, 562; <sup>1</sup>H NMR (500 MHz, CDCl<sub>3</sub>)  $\delta$  2.89 (s, 3H), 3.12 (t, *J* = 12.3 Hz, 1H), 3.67 (dd, *J* = 12.6, 3.4 Hz, 1H), 3.86 (s, 3H), 5.02 (dd, *J* = 10.8, 3.4 Hz, 1H), 5.80 (s, 1H), 6.93 (d, *J* = 8.6 Hz, 2H), 7.18 (d, *J* = 7.5 Hz, 2H), 7.27–7.36 (m, 6H), 7.59 (d, *J* = 6.9 Hz, 2H), 7.73 (d, *J* = 8.6 Hz, 2H); <sup>13</sup>C NMR (125 MHz, CDCl<sub>3</sub>)  $\delta$  41.1, 45.4, 55.6, 72.6, 76.0, 114.3, 126.5, 128.1, 128.4, 128.5, 128.6, 129.4, 132.3, 134.4, 136.7, 137.8, 163.0; HRMS (ESI) calcd for C<sub>23</sub>H<sub>25</sub>N<sub>2</sub>O<sub>4</sub>S (M+H)<sup>+</sup> 425.1535, found 425.1537.

**4-((4-(Tert-butyl)phenyl)sulfonyl)-2-methyl-3,6-diphenyl-1,2,4-oxadiazinane (3p).** The general method described above was followed when aziridine **1p** (31.5 mg, 0.100 mmol) was reacted with nitrene **2a** (20.5 mg, 0.150 mmol) in presence of LiClO<sub>4</sub> (10 mol%) and Bu<sub>4</sub>NBF<sub>4</sub> (10 mol%) at 80 °C for 35 minutes to afford **3p** (32.4 mg, 0.072 mmol) as a gummy liquid in 72% yield: *R<sub>f</sub>* 0.7 (10 % ethyl acetate in petroleum ether); IR  $\nu_{\text{max}}$  (KBr, cm<sup>-1</sup>) 3452, 3062, 3032, 2963, 2928, 2869, 1595, 1494, 1450, 1397, 1293, 1267, 1199, 1164, 1112, 1100, 1085, 1061, 1030, 1014, 1002, 957, 865, 840, 749, 740, 698, 658, 593, 531; <sup>1</sup>H NMR (500 MHz, CDCl<sub>3</sub>)  $\delta$  1.34 (s, 9H), 2.40 (s, 3H), 3.22 (t, *J* = 12.3 Hz, 1H), 3.75 (dd, 14.3, 3.4 Hz, 1H), 5.08 (dd, *J* = 10.8, 3.4 Hz, 1H), 5.80 (s, 1H), 7.21 (d, *J* = 5.7 Hz, 2H), 7.27–7.31 (m, 6H), 7.46 (d, *J* = 8.6 Hz, 2H), 7.54 (d, *J* = 5.8 Hz, 2H), 7.72 (d, *J* = 8.6 Hz, 2H); <sup>13</sup>C NMR (125 MHz, CDCl<sub>3</sub>)  $\delta$  31.0, 35.0, 41.0, 45.5, 72.4, 75.9,

126.0, 126.6, 127.2, 128.1, 128.4, 128.5, 128.6, 129.9, 136.5, 137.5, 139.9, 156.6; HRMS (ESI) calcd for C<sub>26</sub>H<sub>31</sub>N<sub>2</sub>O<sub>3</sub>S (M+H)<sup>+</sup> 451.2055, found 451.2050.

**2,3,6-triphenyl-4-tosyl-1,2,4-oxadiazinane (3pa).** The general method described above was followed when aziridine **1a** (27.3 mg, 0.100 mmol) was reacted with nitron **2l** (29.5 mg, 0.150 mmol) in presence of LiClO<sub>4</sub> (10 mol%) and Bu<sub>4</sub>NBF<sub>4</sub> (10 mol%) at 80 °C for 30 minutes to afford **3pa** (41.36 mg, 0.088 mmol) as a white solid in 88% yield: *R<sub>f</sub>* 0.7 (10 % ethyl acetate in petroleum ether), mp 162–164 °C; IR  $\nu_{\max}$  (KBr, cm<sup>-1</sup>) 3445, 3062, 3031, 2957, 2922, 2852, 1954, 1732, 1597, 1493, 1453, 1419, 1342, 1242, 1216, 1162, 1125, 1095, 1056, 1045, 957, 865, 840, 749, 738, 695, 658, 594, 538: <sup>1</sup>H NMR (500 MHz, CDCl<sub>3</sub>)  $\delta$  2.37 (s, 3H), 3.33 (dd, *J* = 14.2, 11.4 Hz, 1H), 3.64 (dd, *J* = 14.8, 2.7 Hz, 1H), 4.62 (dd, *J* = 11.4, 3.2 Hz, 1H), 6.96 (t, *J* = 7.3 Hz, 1H), 7.04–7.11 (m, 5H), 7.15 (d, *J* = 7.7 Hz, 2H), 7.27–7.39 (m, 8H), 7.62–7.67 (m, 4H); <sup>13</sup>C NMR (125 MHz, CDCl<sub>3</sub>)  $\delta$  21.6, 45.6, 70.8, 74.9, 114.0, 121.3, 126.5, 127.5, 128.2, 128.3, 128.6, 128.7, 129.0, 129.5, 129.7, 136.0, 136.3, 136.9, 143.8, 146; HRMS (ESI) calcd for C<sub>28</sub>H<sub>26</sub>N<sub>2</sub>O<sub>3</sub>S (M+H)<sup>+</sup> 471.1742, found 471.1745.

**(3S,6S)-3-(4-Bromo-2-fluorophenyl)-2-methyl-6-phenyl-4-(phenylsulfonyl)-1,2,4-oxadiazinane (3q).** The general method described above was followed when (*R*)-**1m** (26.0 mg, 0.100 mmol) was reacted with nitron **2b** (34.5 mg, 0.150 mmol) in presence of LiClO<sub>4</sub> (10 mol%) and Bu<sub>4</sub>NBF<sub>4</sub> (10 mol%) at 80 °C for 45 minutes to afford **3q** (32.8 mg, 0.067 mmol) as a thick liquid in 67% yield: *R<sub>f</sub>* 0.6 (10 % ethyl acetate in petroleum ether); IR  $\nu_{\max}$  (KBr, cm<sup>-1</sup>) 3064, 2924, 2853, 1601, 1572, 1481, 1447, 1406, 1352, 1310, 1289, 1260, 1217, 1162, 1088, 1070, 990, 910, 870, 817, 753, 720, 689, 637, 546: <sup>1</sup>H NMR (500 MHz, CDCl<sub>3</sub>)  $\delta$  2.77 (s, 3H), 3.32 (t, *J* = 14.8 Hz, 1H), 3.79 (dd, *J* = 13.7, 3.4 Hz, 1H), 5.08 (dd, *J* = 10.8, 4.0 Hz, 1H), 6.05 (s, 1H), 7.24 (d, *J* = 8.5 Hz,

2H), 7.31–7.38 (m, 6H), 7.42 (t,  $J = 8.0$  Hz, 2H), 7.52 (t,  $J = 7.4$  Hz, 1H), 7.78 (d,  $J = 8.0$  Hz, 2H);  $^{13}\text{C}$  NMR (125 MHz,  $\text{CDCl}_3$ )  $\delta$  41.2, 45.5, 69.7, 75.6, 119.4, 119.6, 122.9, 123.2, 126.3, 127.3, 127.5, 128.3, 128.9, 131.7, 132.6, 137.8, 139.9, 159.5, 161.5; HRMS (ESI) calcd for  $\text{C}_{22}\text{H}_{21}\text{BrFN}_2\text{O}_3\text{S}$  ( $\text{M}+\text{H}$ ) $^+$  491.0440, found 491.0442.  $[\alpha]_{\text{D}}^{25} = +66.0$  (c 0.15,  $\text{CHCl}_3$ ) for a >99% ee sample. The enantiomeric excess was determined by chiral HPLC analysis (chiralpak Cellulose 2 column), n-hexane/*i*-propanol = 80:20, flow rate = 1 mL/min, tR (1) = 9.30 min (minor), tR (2) = 11.20 min (major).

**(3*S*,6*S*)-3-(4-Methoxyphenyl)-2-methyl-6-phenyl-4-(phenylsulfonyl)-1,2,4-oxadiazinane (3r).**

The general method described above was followed when (*R*)-**1m** (26.0 mg, 0.100 mmol) was reacted with nitrene **2c** (24.7 mg, 0.150 mmol) in presence of  $\text{LiClO}_4$  (10 mol%) and  $\text{Bu}_4\text{NBF}_4$  (10 mol%) at 80 °C for 30 minutes to afford **3r** (41.2 mg, 0.097 mmol) as a colourless solid in 97% yield:  $R_f$  0.6 (10 % ethyl acetate in petroleum ether); m.p 130–132 °C; IR  $\nu_{\text{max}}$  (KBr,  $\text{cm}^{-1}$ ) 3064, 2961, 2925, 1610, 1585, 1511, 1446, 1344, 1252, 1163, 1103, 1088, 1031, 958, 914, 875, 782, 715, 690, 548;  $^1\text{H}$  NMR (500 MHz,  $\text{CDCl}_3$ )  $\delta$  2.82 (s, 3H), 3.24 (t,  $J = 12.4$  Hz, 1H), 3.74 (dd,  $J = 14.9, 4.3$  Hz, 1H), 3.80 (s, 3H), 4.99 (dd,  $J = 10.2, 3.7$  Hz, 1H), 5.70 (s, 1H), 6.83 (d,  $J = 8.8$  Hz, 2H), 7.20 (bd,  $J = 9.0$  Hz, 2H), 7.27–7.30 (m, 3H), 7.44–7.46 (m, 4H), 7.54 (t,  $J = 7.5$  Hz, 1H), 7.79 (d,  $J = 7.5$  Hz, 2H);  $^{13}\text{C}$  NMR (125 MHz,  $\text{CDCl}_3$ )  $\delta$  41.1, 45.4, 55.3, 73.0, 75.8, 113.4, 113.9, 126.5, 127.2, 128.5, 128.6, 129.0, 129.8, 132.6, 137.8, 140.7, 159.6; HRMS (ESI) calcd for  $\text{C}_{23}\text{H}_{25}\text{N}_2\text{O}_4\text{S}$  ( $\text{M}+\text{H}$ ) $^+$  425.1535, found 425.1539.  $[\alpha]_{\text{D}}^{25} = +115.2$  (c 0.15,  $\text{CHCl}_3$ ) for a >99% ee sample. The enantiomeric excess was determined by chiral HPLC analysis (OD-H column), n-hexane/*i*-propanol = 95:5, flow rate = 1 mL/min, tR (1) = 14.70 min (minor), tR (2) = 25.41 min (major).

**(3*S*,6*S*)-3-(4-(*Tert*-butyl)phenyl)-2-methyl-6-phenyl-4-(phenylsulfonyl)-1,2,4-oxadiazinane (3*s*).**

The general method described above was followed when (*R*)-**1m** (26.0 mg, 0.100 mmol) was reacted with nitrone **2d** (34.0 mg, 0.150 mmol) in presence of LiClO<sub>4</sub> (10 mol%) and Bu<sub>4</sub>NBF<sub>4</sub> (10 mol%) at 80 °C for 30 minutes to afford **3s** ( 32.9 mg, 0.073 mmol) as a gummy liquid in 73% yield: *R<sub>f</sub>* 0.8 (10 % ethyl acetate in petroleum ether); IR  $\nu_{\max}$  (KBr, cm<sup>-1</sup>) 2960, 1446, 1346, 1164, 1087, 957, 879, 754, 719, 689, 638, 602, 577, 547; <sup>1</sup>H MR (500 MHz, CDCl<sub>3</sub>)  $\delta$  1.31 (s, 9H), 2.81 (s, 3H), 3.26 (t, *J* = 12.0 Hz, 1H), 3.76 (dd, *J* = 13.7, 2.8 Hz, 1H), 5.02 (dd, *J* = 10.8, 3.4 Hz, 1H), 5.75 (s, 1H), 7.22–7.32 (m, 8H), 7.40–7.45 (m, 3H), 7.51 (t, *J* = 6.8 Hz, 1H), 7.75 (d, *J* = 8.0 Hz, 2H); <sup>13</sup>C NMR (125 MHz, CDCl<sub>3</sub>)  $\delta$  31.3, 41.2, 45.5, 73.4, 76.2, 125.3, 126.5, 126.6, 127.2, 127.9, 128.3, 128.5, 128.6, 128.9, 129.1, 132.5, 133.2, 140.6, 151.3 ; HRMS (ESI) calcd for C<sub>26</sub>H<sub>31</sub>N<sub>2</sub>O<sub>3</sub>S (M+H)<sup>+</sup> 451.2055, found 451.2063. [ $\alpha$ ]<sub>D</sub><sup>25</sup> = +54.0 (c 0.16, CHCl<sub>3</sub>) for a 99% ee sample. The enantiomeric excess was determined by chiral HPLC analysis (chiral pak Cellulose 2 column), n-hexane/i-propanol = 80:20, flow rate = 1 mL/min, tR (1) = 8.56 min (minor), tR (2) = 10.73 min (major).

**(3*S*,6*S*)-2-Methyl-6-phenyl-4-(phenylsulfonyl)-3-(4-(trifluoromethyl)phenyl)-1,2,4-**

**oxadiazinane (3t).** The general method described above was followed when (*R*)-**1m** (26.0 mg, 0.100 mmol) was reacted with nitrone **2e** (30.4 mg, 0.150 mmol) in presence of LiClO<sub>4</sub> (10 mol%) and Bu<sub>4</sub>NBF<sub>4</sub> (10 mol%) at 80 °C for 30 minutes to afford **3t** ( 40.7 mg, 0.088 mmol) as a gummy liquid in 88% yield: *R<sub>f</sub>* 0.7 (10 % ethyl acetate in petroleum ether); IR  $\nu_{\max}$  (KBr, cm<sup>-1</sup>) 3065, 2925, 2854, 1619, 1586, 1496, 1447, 1412, 1326, 1263, 1166, 1125, 1110, 1088, 1018, 990, 962, 925, 832, 804, 755, 719, 690, 673, 639, 580, 550, 539, : <sup>1</sup>H NMR (500 MHz, CDCl<sub>3</sub>)  $\delta$  2.92 (s, 3H), 3.15 (t, *J* = 13.7 Hz, 1H), 3.78 (dd, *J* = 14.3, 3.4 Hz, 1H), 5.04 (dd, *J* = 10.8, 3.4 Hz, 1H), 5.84 (s, 1H), 7.16 (d, *J* = 7.4 Hz, 2H), 7.28–7.30 (m, 3H), 7.51 (t, *J* = 7.4 Hz, 2H), 7.60 (d, *J* = 8.0

Hz, 3H), 7.69 (d,  $J = 8.0$  Hz, 2H), 7.85 (d,  $J = 7.4$  Hz, 2H);  $^{13}\text{C}$  NMR (125 MHz,  $\text{CDCl}_3$ )  $\delta$  40.8, 45.5, 71.5, 75.2, 123.0, 125.4, 125.5, 126.5, 127.1, 128.1, 128.7, 128.8, 129.3, 132.9, 137.0, 140.5, 140.7; HRMS (ESI) calcd for  $\text{C}_{23}\text{H}_{22}\text{F}_3\text{N}_2\text{O}_3\text{S}$  ( $\text{M}+\text{H}$ ) $^+$  463.1303, found 463.1302.  $[\alpha]_{\text{D}}^{25} = +79.2$  (c 0.30,  $\text{CHCl}_3$ ) for a 99% ee sample. The enantiomeric excess was determined by chiral HPLC analysis (chiralpak Cellulose 2 column), n-hexane/i-propanol = 80:20, flow rate = 1 mL/min, tR (1) = 7.43 min (minor), tR (2) = 8.67 min (major).

**(3S,6S)-3-(furan-2-yl)-2-methyl-6-phenyl-4-(phenylsulfonyl)-1,2,4-oxadiazinane (3u).** The general method described above was followed when (*R*)-**1m** (26.0 mg, 0.100 mmol) was reacted with nitrone **2a** (20.5 mg, 0.150 mmol) in presence of  $\text{LiClO}_4$  (10 mol%) and  $\text{Bu}_4\text{NBF}_4$  (10 mol%) at 80 °C for 30 minutes to afford **3u** (39.5 mg, 0.099 mmol) as a white solid in 99% yield:  $R_f$  0.7 (10 % ethyl acetate in petroleum ether); m.p 132–134 °C; IR  $\nu_{\text{max}}$  (KBr,  $\text{cm}^{-1}$ ) 3063, 2962, 2927, 2889, 1585, 1496, 1479, 1447, 1349, 1310, 1260, 1226, 1201, 1165, 1119, 1087, 1058, 1003, 995, 955, 930, 913, 883, 816, 754, 719, 698, 689, 601, 578, 545;  $^1\text{H}$  NMR (500 MHz,  $\text{CDCl}_3$ )  $\delta$  2.66 (s, 3H), 3.25 (t,  $J = 11.5$  Hz, 1H), 3.75 (dd,  $J = 13.2, 3.4$  Hz, 1H), 5.01 (dd,  $J = 11.5, 3.4$  Hz, 1H), 5.84 (s, 1H), 6.30 (d,  $J = 1.7$  Hz, 1H), 6.44 (d,  $J = 2.9$  Hz, 1H), 7.25-7.33 (m, 6H), 7.39 (t,  $J = 8.0$  Hz, 2H), 7.49 (t,  $J = 14.9$  Hz, 1H), 7.70 (d,  $J = 8.0$  Hz, 2H);  $^{13}\text{C}$  NMR (125 MHz,  $\text{CDCl}_3$ )  $\delta$  41.2, 46.0, 70.6, 76.6, 110.1, 110.9, 126.3, 127.2, 128.6, 129.0, 132.4, 137.4, 139.6, 142.3, 148.1; HRMS (ESI) calcd for  $\text{C}_{20}\text{H}_{20}\text{N}_2\text{O}_4\text{S}$  ( $\text{M}+\text{H}$ ) $^+$  385.1222, found 385.1229.  $[\alpha]_{\text{D}}^{25} = +136.00$  (c 0.10,  $\text{CHCl}_3$ ) for a 99% ee sample. The enantiomeric excess was determined by chiral HPLC analysis (chiralpak Cellulose 2 column), n-hexane/i-propanol = 95:5, flow rate = 1 mL/min, tR (1) = 34.51 min (minor), tR (2) = 57.70 min (major).

**(3*S*,6*S*)-2-Methyl-3-(naphthalen-2-yl)-6-phenyl-4-(phenylsulfonyl)-1,2,4-oxadiazinane (3*v*).** The general method described above was followed when (*R*)-**1m** (26.0 mg, 0.100 mmol) was reacted with nitrone **2g** (27.7 mg, 0.150 mmol) in presence of LiClO<sub>4</sub> (10 mol%) and Bu<sub>4</sub>NBF<sub>4</sub> (10 mol%) at 80 °C for 45 minutes to afford **3v** (31.1 mg, 0.070 mmol) as a gummy liquid in 70% yield: *R<sub>f</sub>* 0.7 (10 % ethyl acetate in petroleum ether); IR  $\nu_{\max}$  (KBr, cm<sup>-1</sup>) 3060, 2956, 2924, 2854, 1738, 1601, 1507, 1496, 1446, 1345, 1311, 1265, 1203, 1119, 1103, 1087, 1062, 972, 948, 612, 861, 805, 784, 698, 636, 546, 522: <sup>1</sup>H NMR (500 MHz, CDCl<sub>3</sub>)  $\delta$  2.97 (s, 3H), 2.29 (t, *J* = 12.5 Hz, 1H), 3.82 (dd, 13.9, 3.4 Hz, 1H), 5.10 (dd, *J* = 11.0, 3.6 Hz, 1H), 5.96 (s, 1H), 7.18–7.20 (m, 2H), 7.26–7.28 (m, 3H), 7.43–7.50 (m, 4H), 7.55 (t, *J* = 7.3 Hz, 1H), 7.66–7.72 (m, 2H), 7.78–7.86 (m, 4H), 7.94 (s, 1H); <sup>13</sup>C NMR (125 MHz, CDCl<sub>3</sub>)  $\delta$  41.0, 45.6, 72.2, 76.3, 125.9, 126.2, 126.4, 126.6, 127.2, 127.5, 127.9, 128.2, 128.3, 128.6, 129.1, 131.9, 132.7, 132.2, 134.0, 137.7; HRMS (ESI) calcd for C<sub>26</sub>H<sub>24</sub>N<sub>2</sub>O<sub>3</sub>S (M+H)<sup>+</sup> 445.1586, found 445.1580. [ $\alpha$ ]<sub>D</sub><sup>25</sup> = -35.00 (c 0.15, CHCl<sub>3</sub>) for a >98% ee sample. The enantiomeric excess was determined by chiral HPLC analysis (OD-H column), n-hexane/i-propanol = 95:5, flow rate = 1 mL/min, tR (1) = 13.63 min (minor), tR (2) = 20.36 min (major).

**(3*S*,6*S*)-3-(2,6-Dichlorophenyl)-2-methyl-6-phenyl-4-(phenylsulfonyl)-1,2,4-oxadiazinane (3*w*).**

The general method described above was followed when (*R*)-**1m** (26.0 mg, 0.100 mmol) was reacted with nitrone **2h** (30.3 mg, 0.150 mmol) in presence of LiClO<sub>4</sub> (10 mol%) and Bu<sub>4</sub>NBF<sub>4</sub> (10 mol%) at 80 °C for 45 minutes to afford **3w** (31.4 mg, 0.068 mmol) as a gummy liquid in 68% yield: *R<sub>f</sub>* 0.7 (10 % ethyl acetate in petroleum ether); IR  $\nu_{\max}$  (KBr, cm<sup>-1</sup>) 3063, 2921, 2852, 1579, 1563, 1492, 1438, 1351, 1289, 1254, 1206, 1192, 1133, 1093, 1059, 1027, 990, 957, 954, 871, 781, 713, 690, 576, 555: <sup>1</sup>H NMR (500 MHz, CDCl<sub>3</sub>)  $\delta$  2.53 (s, 3H), 4.10–4.72 (m, 2H), 4.78 (dd, *J* = 10.3, 7.1 Hz, 1H), 6.26 (s, 1H), 7.15 (t, *J* = 7.8 Hz, 1H), 7.25–7.35 (m, 7H), 7.43 (t, *J* = 7.6

Hz, 2H), 7.53 (t,  $J = 7.2$  Hz, 1H), 7.80 (d,  $J = 7.5$  Hz, 2H);  $^{13}\text{C}$  NMR (125 MHz,  $\text{CDCl}_3$ )  $\delta$  40.8, 46.1, 79.2, 79.6, 125.8, 127.3, 128.2, 128.6, 128.9, 129.6, 130.1, 132.4, 132.7, 136.5, 140.0, 141.3; HRMS (ESI) calcd for  $\text{C}_{26}\text{H}_{31}\text{N}_2\text{O}_3\text{S}$  ( $\text{M}+\text{H}$ ) $^+$  463.0650, found 463.0659.  $[\alpha]_{\text{D}}^{25} = +82.5$  (c 0.16,  $\text{CHCl}_3$ ) for a >99% ee sample. The enantiomeric excess was determined by chiral HPLC analysis (OD-H column), n-hexane/*i*-propanol = 95:5, flow rate = 1 mL/min, tR (1) = 11.41 min (minor), tR (2) = 13.90 min (major).

**(3*S*,6*S*)-2-Benzyl-3-(furan-2-yl)-6-phenyl-4-(phenylsulfonyl)-1,2,4-oxadiazinane (3x).** The general method described above was followed when (*R*)-**1m** (26.0 mg, 0.100 mmol) was reacted with nitrone **2i** (31.6 mg, 0.150 mmol) in presence of  $\text{LiClO}_4$  (10 mol%) and  $\text{Bu}_4\text{NBF}_4$  (10 mol%) at 80 °C for 30 minutes to afford **3x** (44.2 mg, 0.096 mmol) as a white solid in 96% yield:  $R_f$  0.7 (10 % ethyl acetate in petroleum ether), m.p 123–125 °C; IR  $\nu_{\text{max}}$  (KBr,  $\text{cm}^{-1}$ ) 3063, 3032, 2923, 1586, 1496, 1447, 1350, 1310, 1263, 1226, 1201, 1167, 1101, 1087, 1071, 1014, 990, 914, 884, 815, 792, 719, 698, 639, 599, 577;  $^1\text{H}$  NMR (500 MHz,  $\text{CDCl}_3$ )  $\delta$  3.35 (t,  $J = 11.7$  Hz, 1H), 3.84–3.91 (m, 2H), 4.06 (d,  $J = 13.2$  Hz, 1H), 4.96 (dd,  $J = 11.5, 3.4$  Hz, 1H), 5.90 (s, 1H), 6.31 (s, 1H), 6.51 (d,  $J = 3.4$  Hz, 2H), 7.23–7.32 (m, 11H), 7.42 (t,  $J = 7.5$  Hz, 2H), 7.52 (t,  $J = 7.5$  Hz, 1H), 7.71 (d,  $J = 8.0$  Hz, 2H);  $^{13}\text{C}$  NMR (125 MHz,  $\text{CDCl}_3$ )  $\delta$  46.2, 57.8, 68.8, 76.7, 110.2, 110.9, 126.4, 127.5, 127.6, 128.4, 128.6, 128.8, 129.0, 132.5, 135.8, 137.4, 139.9, 142.5, 148.4; HRMS (ESI) calcd for  $\text{C}_{26}\text{H}_{25}\text{N}_2\text{O}_4\text{S}$  ( $\text{M}+\text{H}$ ) $^+$  461.1535, found 461.1534.  $[\alpha]_{\text{D}}^{25} = +57.3$  (c 0.10,  $\text{CHCl}_3$ ) for a >99% ee sample. The enantiomeric excess was determined by chiral HPLC analysis (OD-H column), n-hexane/*i*-propanol = 95:5, flow rate = 1 mL/min, tR (1) = 13.01 min (minor), tR (2) = 13.71 min (major).

**(3*S*,6*S*)-2-benzyl-6-phenyl-4-(phenylsulfonyl)-3-(4-(trifluoromethyl)phenyl)-1,2,4-oxadiazinane**

**(3y).** The general method described above was followed when (*R*)-**1m** (26.0 mg, 0.100 mmol) was reacted with nitrone **2j** (41.8 mg, 0.150 mmol) in presence of LiClO<sub>4</sub> (10 mol%) and Bu<sub>4</sub>NBF<sub>4</sub> (10 mol%) at 80 °C for 30 minutes to afford **3y** ( 49.5 mg, 0.092 mmol) as a gummy liquid in 92% yield: *R<sub>f</sub>* 0.7 (10 % ethyl acetate in petroleum ether); IR  $\nu_{\text{max}}$  (KBr, cm<sup>-1</sup>) 3065, 3033, 2924, 2854, 1619, 1496, 1447, 1411, 1325, 1263, 1165, 1124, 1068, 1018, 960, 881, 840, 802, 755, 720, 698, 601: <sup>1</sup>H NMR (500 MHz, CDCl<sub>3</sub>)  $\delta$  3.21 (dd, *J* = 14.3, 10.3 Hz, 1H), 3.86 (dd, *J* = 14.3, 3.4 Hz, 1H), 4.26 (d, *J* = 13.2 Hz, 1H), 4.38 (d, *J* = 13.7 Hz, 1H), 5.07 (dd, *J* = 11.5, 2.3 Hz, 1H), 5.90 (s, 1H), 7.11 (dd, *J* = 5.2, 1.7 Hz, 2H), 7.26–7.35 (m, 6H), 7.39 (d, *J* = 8.6 Hz, 2H), 7.52 (t, *J* = 8.0 Hz, 2H), 7.57–7.64 (m, 3H), 7.67 (d, *J* = 8.6 Hz, 2H), 7.84 (d, *J* = 7.5 Hz, 2H); <sup>13</sup>C NMR (125 MHz, CDCl<sub>3</sub>)  $\delta$  45.5, 57.1, 72.4, 72.5, 125.4, 125.5, 126.5, 127.2, 127.8, 128.5, 128.7, 128.8, 128.9, 129.2, 129.3, 130.2, 133.0, 135.7, 136.9, 140.5, 140.8; HRMS (ESI) calcd for C<sub>29</sub>H<sub>26</sub>F<sub>3</sub>N<sub>2</sub>O<sub>3</sub>S (M+H)<sup>+</sup> 539.1616, found 539.1610. [ $\alpha$ ]<sub>D</sub><sup>25</sup> = +126.3 (c 0.15, CHCl<sub>3</sub>) for a 99% ee sample. The enantiomeric excess was determined by chiral HPLC analysis (OD-H column), n-hexane/*i*-propanol = 95:5, flow rate = 1 mL/min, t<sub>R</sub> (1) = 10.08 min (minor), t<sub>R</sub> (2) = 11.26 min (major).

**(3*S*,6*S*)-2-Benzyl-3,6-diphenyl-4-(phenylsulfonyl)-1,2,4-oxadiazinane (3z).** The general method

described above was followed when (*R*)-**1m** (26.0 mg, 0.100 mmol) was reacted with nitrone **2k** (31.6 mg, 0.150 mmol) in presence of LiClO<sub>4</sub> (10 mol%) and Bu<sub>4</sub>NBF<sub>4</sub> (10 mol%) at 80 °C for 30 minutes to afford **3z** ( 40.5 mg, 0.086 mmol) as a gummy liquid in 86% yield: *R<sub>f</sub>* 0.7 (10 % ethyl acetate in petroleum ether); IR  $\nu_{\text{max}}$  (KBr, cm<sup>-1</sup>) 3063, 3061, 2924, 2855, 1603, 1494, 1447, 1347, 1264, 1165, 1099, 1070, 1029, 957, 911, 867, 805, 755, 740, 721, 697, 642, 577: <sup>1</sup>H NMR (500 MHz, CDCl<sub>3</sub>)  $\delta$  3.29 (dd, *J* = 10.8, 3.7 Hz, 1H), 3.84 (dd, *J* = 14.3, 2.9 Hz, 1H), 4.21 (d, *J* = 13.2



Hz, 1H), 4.33 (d,  $J = 13.7$  Hz, 1H), 5.04 (dd,  $J = 11.4, 3.4$  Hz, 1H), 5.88 (s, 1H), 7.14 (t,  $J = 3.4$  Hz, 2H), 7.25–7.33 (m, 9H), 7.37 (d,  $J = 6.9$  Hz, 2H), 7.49 (t,  $J = 7.5$  Hz, 2H), 7.58 (t,  $J = 8.0$  Hz, 3H), 7.83 (d,  $J = 7.5$  Hz, 2H);  $^{13}\text{C}$  NMR (125 MHz,  $\text{CDCl}_3$ )  $\delta$  40.8, 45.5, 71.5, 75.2, 123.0, 125.4, 125.5, 126.5, 127.1, 128.1, 128.7, 128.8, 129.3, 132.9, 137.0, 140.5, 140.7; HRMS (ESI) calcd for  $\text{C}_{28}\text{H}_{27}\text{N}_2\text{O}_3\text{S}$  ( $\text{M}+\text{H}$ ) $^+$  471.1742, found 471.1746.  $[\alpha]_{\text{D}}^{25} = +41.00$  (c 0.10,  $\text{CHCl}_3$ ) for a 99% ee sample. The enantiomeric excess was determined by chiral HPLC analysis (chiralpak Cellulose 2 column), n-hexane/i-propanol = 95:5, flow rate = 1 mL/min, tR (1) = 14.47 min (minor), tR (2) = 18.84 min (major).

**2-Methyl-3-phenyl-4-tosyl-6-vinyl-1,2,4-oxadiazinane (5a).** The general method described above was followed when aziridine **1q** (22.3 mg, 0.100 mmol) was reacted with nitrone **2a** (20.5 mg, 0.150 mmol) in presence of  $\text{LiClO}_4$  (10 mol%) and  $\text{Bu}_4\text{NBF}_4$  (10 mol%) at 80 °C for 30 minutes to afford **5a** (29.4 mg, 0.082 mmol) as a colourless liquid in 82% yield:  $R_f$  0.7 (10 % ethyl acetate in petroleum ether); IR  $\nu_{\text{max}}$  (KBr,  $\text{cm}^{-1}$ ) 3063, 3030, 2958, 2956, 2924, 1917, 1728, 1645, 1598, 1493, 1449, 1406, 1343, 1306, 1288, 1261, 1161, 1103, 1088, 1066, 985, 890, 740, 699, 614, 585, 522;  $^1\text{H}$  NMR (500 MHz,  $\text{CDCl}_3$ )  $\delta$  2.41 (s, 3H), 2.75 (s, 3H), 3.03 (dd,  $J = 13.7, 10.8$  Hz, 1H), 3.59 (dd,  $J = 13.7, 3.4$  Hz, 1H), 4.44–4.8 (m, 1H), 5.20 (d,  $J = 10.8$  Hz, 1H), 5.26 (d,  $J = 17.4$  Hz, 1H), 5.60–5.67 (m, 2H), 7.24–7.30 (m, 5H), 7.47–7.50 (m, 2H), 7.66 (d,  $J = 8.0$  Hz, 2H);  $^{13}\text{C}$  NMR (125 MHz,  $\text{CDCl}_3$ )  $\delta$  21.6, 41.2, 43.7, 70.6, 76.1, 119.2, 126.6, 127.2, 128.2, 128.4, 129.7, 133.8, 136.4, 137.4, 143; HRMS (ESI) calcd for  $\text{C}_{19}\text{H}_{23}\text{N}_2\text{O}_3\text{S}$  ( $\text{M}+\text{H}$ ) $^+$  359.1429, found 359.1423.

**2-Methyl-3,6-diphenyl-5-propyl-4-tosyl-1,2,4-oxadiazinane (6a).** The general method described above was followed when aziridine **1r** (31.5 mg, 0.100 mmol) was reacted with nitrone **2a** (20.5 mg, 0.150 mmol) in presence of  $\text{LiClO}_4$  (10 mol%) and  $\text{Bu}_4\text{NBF}_4$  (10 mol%) at 80 °C for 30

minutes to afford **6a** (38.7 mg, 0.086 mmol) as a white solid in 86% yield:  $R_f$  0.7 (10 % ethyl acetate in petroleum ether), m.p 117–119 °C; IR  $\nu_{\max}$  (KBr,  $\text{cm}^{-1}$ ) 3061, 3029, 2961, 2929, 2871, 1598, 1494, 1450, 1377, 1349, 1163, 1122, 1087, 1058, 1005, 962, 925, 885, 866, 848, 816, 762, 732, 684, 661, 630, 583, 564, 542, 496:  $^1\text{H}$  NMR (500 MHz,  $\text{CDCl}_3$ )  $\delta$  0.22 (t,  $J = 6.8$  Hz, 3H), 0.56–0.79 (m, 3H), 0.98–1.06 (m, 1H), 2.45 (s, 3H), 2.82 (s, 3H), 3.88–3.91 (m, 1H), 5.00 (d,  $J = 4.0$  Hz, 1H), 5.88 (s, 1H), 7.14 (d,  $J = 7.4$  Hz, 2H), 7.20–7.37 (m, 8H), 7.84 (d,  $J = 7.5$  Hz, 2H), 7.90 (d,  $J = 8.6$  Hz, 2H);  $^{13}\text{C}$  NMR (125 MHz,  $\text{CDCl}_3$ )  $\delta$  13.3, 18.9, 21.5, 29.6, 44.4, 57.1, 73.7, 74.4, 125.6, 127.5, 127.6, 127.8, 128.0, 128.3, 128.8, 129.7, 138.1, 138.2, 138.8, 143.7; HRMS (ESI) calcd for  $\text{C}_{26}\text{H}_{31}\text{N}_2\text{O}_3\text{S}$  ( $\text{M}+\text{H}$ ) $^+$  451.2055, found 451.2049.

**6-(2,4-dichlorophenyl)-5-ethyl-2-methyl-3-phenyl-4-tosyl-1,2,4-oxadiazinane (6b).** The general method described above was followed when aziridine **1s** (36.9 mg, 0.100 mmol) was reacted with nitrene **2a** (20.5 mg, 0.150 mmol) in presence of  $\text{LiClO}_4$  (10 mol%) and  $\text{Bu}_4\text{NBF}_4$  (10 mol%) at 80 °C for 120 minutes to afford **6b** (36.2 mg, 0.072 mmol) as a viscous liquid in 72% yield:  $R_f$  0.6 (10 % ethyl acetate in petroleum ether); IR  $\nu_{\max}$  (KBr,  $\text{cm}^{-1}$ ) 3484, 2955, 2925, 2854, 1727, 1640, 1590, 1561, 1493, 1465, 1378, 1350, 1305, 1284, 1164, 1123, 1049, 1020, 999, 971, 912, 864, 814, 771, 744, 724, 679, 667, 581:  $^1\text{H}$  NMR (500 MHz,  $\text{CDCl}_3$ )  $\delta$  0.27 (bt,  $J = 6.8$  Hz, 3H), 0.59 (bs, 1H), 1.10 (bs, 1H), 2.44 (s, 3H), 2.74 (s, 3H), 4.09–4.14 (m, 1H), 5.15 (d,  $J = 3.6$  Hz, 1H), 5.88 (s, 1H), 7.19 (dd,  $J = 8.7, 2.3$  Hz, 1H), 7.26–7.38 (m, 7H), 7.82 (d,  $J = 7.3$  Hz, 2H), 7.90 (d,  $J = 8.6$  Hz, 2H);  $^{13}\text{C}$  NMR (125 MHz,  $\text{CDCl}_3$ )  $\delta$  10.4, 21.5, 21.8, 41.6, 55.2, 72.4, 74.8, 127.2, 127.9, 128.0, 128.2, 128.5, 128.9, 129.0, 129.6, 131.9, 134.0, 134.8, 137.8, 138.8, 143.8; HRMS (ESI) calcd for  $\text{C}_{25}\text{H}_{27}\text{Cl}_2\text{N}_2\text{O}_3\text{S}$  ( $\text{M}+\text{H}$ ) $^+$  505.1119, found 505.1119.

**6-(2,5-dichlorophenyl)-2,5-dimethyl-3-phenyl-4-tosyl-1,2,4-oxadiazinane (6c).** The general method described above was followed when aziridine **1t** (35.5 mg, 0.100 mmol) was reacted with nitrene **2a** (20.5 mg, 0.150 mmol) in presence of LiClO<sub>4</sub> (10 mol%) and Bu<sub>4</sub>NBF<sub>4</sub> (10 mol%) at 80 °C for 120 minutes to afford **6c** (33.3 mg, 0.068 mmol) as a white solid in 68% yield: *R<sub>f</sub>* 0.7 (10 % ethyl acetate in petroleum ether), m.p 147–149 °C; IR  $\nu_{\max}$  (KBr, cm<sup>-1</sup>) 3066, 2929, 2870, 1917, 1592, 1560, 1493, 1447, 1451, 1447, 1402, 1382, 1349, 1330, 1290, 1234, 1164, 1120, 1092, 1053, 995, 886, 814, 772, 742, 675, 600, 580, 546; <sup>1</sup>H NMR (500 MHz, CDCl<sub>3</sub>)  $\delta$  0.47 (d, *J* = 6.8 Hz, 3H), 2.44 (s, 3H), 2.76 (s, 3H), 4.30–4.37 (m, 1H), 5.20 (d, *J* = 4.1 Hz, 1H), 5.76 (s, 1H), 7.16 (dd, *J* = 8.2, 2.2 Hz, 1H), 7.23–7.39 (m, 7H), 7.79 (d, *J* = 7.7 Hz, 2H), 7.89 (d, *J* = 8.2 Hz, 2H); <sup>13</sup>C NMR (125 MHz, CDCl<sub>3</sub>)  $\delta$  16.7, 21.5, 41.2, 48.9, 69.6, 74.2, 127.2, 127.6, 127.8, 128.2, 128.3, 128.9, 129.0, 129.8, 132.0, 134.2, 134.3, 137.7, 139.5, 143.8; HRMS (ESI) calcd for C<sub>24</sub>H<sub>25</sub>Cl<sub>2</sub>N<sub>2</sub>O<sub>3</sub>S (M+H)<sup>+</sup> 491.0963, found 491.0963.

**2-Methyl-3,6-diphenyl-1,2,4-oxadiazinane (7a).** To a Solution of oxadiazinane **3a** (81.2 mg, 0.200 mmol) in anhydrous methanol was added Na<sub>2</sub>HPO<sub>4</sub> (4 equiv) and Na-Hg (2 equiv). The reaction mixture was stirred for 60 min at rt. The reaction mixture was then quenched with water, extracted with diethyl ether (3 × 10.0 mL) and dried over anhydrous Na<sub>2</sub>SO<sub>4</sub>. The crude product was purified by flash column chromatography on silica gel (230–400 mesh) using ethyl acetate in petroleum ether as the eluent to afford NH-free **7a** (37.08, 0.146 mmol) as a clear liquid in 73% yield: *R<sub>f</sub>* 0.4 (20 % ethyl acetate in petroleum ether); IR  $\nu_{\max}$  (KBr, cm<sup>-1</sup>) 3064, 2961, 2925, 1610, 1585, 1511, 1446, 1344, 1252, 1163, 1103, 1088, 1031, 958, 914, 875, 782, 715, 690, 548; <sup>1</sup>H NMR (500 MHz, CDCl<sub>3</sub>)  $\delta$  2.42 (s, 3H), 3.02 (dd, *J* = 13.7, 9.7 Hz, 1H), 3.21 (dd, *J* = 14.9, 2.3 Hz, 1H), 4.28 (s, 1H), 5.01 (dd, *J* = 12.6, 4.0 Hz, 1H), 7.29–7.40 (m, 8H), 7.44 (dd, *J* = 8.6, 2.7

Hz, 2H);  $^{13}\text{C}$  NMR (125 MHz,  $\text{CDCl}_3$ )  $\delta$  42.8, 51.2, 81.2, 83.9, 126.6, 127.4, 128.2, 128.6, 128.8, 128.9, 138.6, 139.5; HRMS (ESI) calcd. for  $\text{C}_{16}\text{H}_{19}\text{N}_2\text{O}$  ( $\text{M}+\text{H}$ ) $^+$  255.1497, found 255.1498.

**(3R,6S)-2-Methyl-3,6-diphenyl-1,4,2-dioxazinane (9a).** The general method described above was followed when (*R*)-**4** (24.0 mg, 0.200 mmol) was reacted with nitrone **2a** (40.5 mg, 0.300 mmol) in presence of  $\text{LiClO}_4$  (10 mol%) and  $\text{Bu}_4\text{NBF}_4$  (10 mol%) at 80 °C for 60 minutes to afford **9a** (48.5 mg, 0.176 mmol) as colourless solid in 85% yield:  $R_f$  0.7 (5 % ethyl acetate in petroleum ether), m.p 90–92 °C; IR  $\nu_{\text{max}}$  (KBr,  $\text{cm}^{-1}$ ) 3031, 2956, 2911, 2853, 1956, 1494, 1451, 1364, 1310, 1251, 1196, 1143, 1091, 1051, 989, 898, 667;  $^1\text{H}$  NMR (500 MHz,  $\text{CDCl}_3$ )  $\delta$  2.42 (s, 3H), 3.77 (dd,  $J = 10.9, 10.4$  Hz, 1H), 4.11 (dd,  $J = 11.4, 2.7$  Hz, 1H), 4.87 (s, 1H), 5.27 (dd,  $J = 10.5, 2.7$  Hz, 1H), 7.31–7.42 (m, 8H), 7.49–7.52 (m, 2H);  $^{13}\text{C}$  NMR (125 MHz,  $\text{CDCl}_3$ )  $\delta$  40.9, 71.4, 78.6, 98.0, 126.9, 127.9, 128.6, 128.7, 128.8, 129.6, 136.6, 136.9; HRMS (ESI) calcd for  $\text{C}_{16}\text{H}_{17}\text{NO}_2$  ( $\text{M}+\text{Na}$ ) $^+$  278.1157, found 278.1153.  $[\alpha]_{\text{D}}^{25} = +46.7$  (c 0.13,  $\text{CHCl}_3$ ) for a >98% ee sample. The enantiomeric excess was determined by chiral HPLC analysis (OD-H column), n-hexane/i-propanol = 95:5, flow rate = 1 mL/min,  $t_R$  (1) = 5.88 min (minor),  $t_R$  (2) = 6.82 min (major).

**2-Methyl-6-phenyl-3-(4-(trifluoromethyl)phenyl)-1,4,2-dioxazinane (9b).** The general method described above was followed when epoxide **4** (24.0 mg, 0.200 mmol) was reacted with nitrone **2e** (60.9 mg, 0.300 mmol) in presence of  $\text{LiClO}_4$  (10 mol%) and  $\text{Bu}_4\text{NBF}_4$  (10 mol%) at 80 °C for 60 minutes to afford **9b** (46.6 mg, 0.144 mmol) as a colourless solid in 72% yield:  $R_f$  0.6 (5 % ethyl acetate in petroleum ether); m.p 105–107 °C; IR  $\nu_{\text{max}}$  (KBr,  $\text{cm}^{-1}$ ) 3063, 3031, 2960, 2928, 1917, 1598, 1495, 1452, 1409, 1378, 1348, 1326, 1305, 1290, 1242, 1162, 1091, 1019, 998, 908, 838, 763, 730, 699, 674, 630, 552;  $^1\text{H}$  NMR (500 MHz,  $\text{CDCl}_3$ )  $\delta$  2.43 (s, 3H), 3.78 (dd,  $J = 10.8, 10.3$  Hz, 1H), 4.12 (dd,  $J = 11.4, 2.4$  Hz, 1H), 4.96 (s, 1H), 5.28 (dd,  $J = 10.3, 2.8$  Hz, 1H),

7.33–7.40 (m, 5H), 7.62–7.68 (m, 4H);  $^{13}\text{C}$  NMR (125 MHz,  $\text{CDCl}_3$ )  $\delta$  40.5, 71.3, 78.3, 96.9, 125.6, 125.7, 126.8, 128.4, 128.7, 128.8, 131.6, 131.8, 136.4, 140.7; HRMS (ESI) calcd for  $\text{C}_{17}\text{H}_{17}\text{F}_3\text{NO}_2$  ( $\text{M}+\text{H}$ ) $^+$  324.1211, found 324.1208

**3-(4-Methoxyphenyl)-2-methyl-6-phenyl-1,4,2-dioxazinane (9c).** The general method described above was followed when epoxide **4** (24.0 mg, 0.200 mmol) was reacted with nitrone **2c** (49.5 mg, 0.300 mmol) in presence of  $\text{LiClO}_4$  (10 mol%) and  $\text{Bu}_4\text{NBF}_4$  (10 mol%) at 80 °C for 60 minutes to afford **9c** (51.7 mg, 0.168 mmol) as yellow solid in 84% yield:  $R_f$  0.5 (5 % ethyl acetate in petroleum ether); m.p 114–116 °C; IR  $\nu_{\text{max}}$  (KBr,  $\text{cm}^{-1}$ ) 2956, 2924, 2853, 1742, 1613, 1586, 1515, 1496, 1462, 1377, 1364, 1251, 1103, 1036, 994, 964, 898, 823, 806, 754, 725, 698, 650, 599;  $^1\text{H}$  NMR (500 MHz,  $\text{CDCl}_3$ )  $\delta$  2.41 (s, 3H), 3.76 (dd,  $J = 11.4, 10.5$  Hz, 1H), 3.82 (s, 3H), 4.10 (dd,  $J = 11.4, 2.8$  Hz, 1H), 4.81 (s, 1H), 5.25 (dd,  $J = 10.3, 2.8$  Hz, 1H), 6.91 (d,  $J = 16.3$  Hz, 2H), 7.33–7.40 (m, 5H), 7.43 (d,  $J = 11.4$  Hz, 2H);  $^{13}\text{C}$  NMR (125 MHz,  $\text{CDCl}_3$ )  $\delta$  40.9, 55.4, 71.4, 78.7, 97.7, 114.1, 126.8, 128.5, 128.6, 129.2, 129.4, 136.7, 160.5; HRMS (ESI) calcd for  $\text{C}_{17}\text{H}_{19}\text{NO}_3$  ( $\text{M}+\text{Na}$ ) $^+$  308.1263, found 308.1265.

**3-(2,6-Dichlorophenyl)-2-methyl-6-phenyl-1,4,2-dioxazinane (9d).** The general method described above was followed when epoxide **4** (24.0 mg, 0.200 mmol) was reacted with nitrone **2h** (60.6 mg, 0.300 mmol) in presence of  $\text{LiClO}_4$  (10 mol%) and  $\text{Bu}_4\text{NBF}_4$  (10 mol%) at 80 °C for 90 minutes to afford **9d** (40.8 mg, 0.126 mmol) as a white solid in 63% yield:  $R_f$  0.6 (5 % ethyl acetate in petroleum ether); m.p 122–124 °C; IR  $\nu_{\text{max}}$  (KBr,  $\text{cm}^{-1}$ ) 3063, 3032, 2965, 2880, 2853, 1698, 1581, 1563, 1495, 1453, 1403, 1368, 1343, 1328, 1266, 1186, 1105, 1052, 996, 965, 899, 757, 698;  $^1\text{H}$  NMR (500 MHz,  $\text{CDCl}_3$ )  $\delta$  2.53 (s, 3H), 3.79 (dd,  $J = 10.9, 10.5$  Hz, 1H), 4.15 (dd,  $J = 12.8, 4.1$  Hz, 1H), 5.33 (dd,  $J = 10.5, 2.7$  Hz, 1H), 5.77 (s, 1H), 7.20 (t,  $J = 8.2$  Hz, 1H), 7.28–7.43 (m, 7H);

$^{13}\text{C}$  NMR (125 MHz,  $\text{CDCl}_3$ )  $\delta$  40.5, 71.3, 79.3, 94.1, 126.8, 127.8, 128.5, 128.6, 130.6, 131.1, 131.5, 136.4; HRMS (ESI) calcd for  $\text{C}_{16}\text{H}_{16}\text{Cl}_2\text{NO}_2$  ( $\text{M}+\text{H}$ ) $^+$  324.0558, found 324.0553

**3-(Furan-2-yl)-2-methyl-6-phenyl-1,4,2-dioxazinane (9e).** The general method described above was followed when epoxide **4** (24.0 mg, 0.200 mmol) was reacted with nitrone **2f** (37.5 mg, 0.300 mmol) in presence of  $\text{LiClO}_4$  (10 mol%) and  $\text{Bu}_4\text{NBF}_4$  (10 mol%) at 80 °C for 60 minutes to afford **9e** (44.4 mg, 0.166 mmol) as a colourless solid in 83% yield:  $R_f$  0.7 (5 % ethyl acetate in petroleum ether); m.p 102–104 °C; IR  $\nu_{\text{max}}$  (KBr,  $\text{cm}^{-1}$ ) , 3034, 2954, 2920, 1910, 1698, 1595, 1552, 1456, 1401, 1388, 1344, 1321, 1301, 1278, 1224, 1182, 1085, 1011, 999, 930, 838, 762, 735, 699, 675, 630, 522;  $^1\text{H}$  NMR (500 MHz,  $\text{CDCl}_3$ )  $\delta$  2.50 (s, 3H), 3.73 (dd,  $J = 11.4, 10.4$  Hz, 1H), 4.10 (dd,  $J = 11.9, 2.7$  Hz, 1H), 4.96 (s, 1H), 5.24 (dd,  $J = 10.5, 2.7$  Hz, 1H), 6.40 (dd,  $J = 3.2, 1.8$  Hz, 1H), 6.53 (t,  $J = 3.2$  Hz, 1H), 7.29–7.38 (m, 5H), 7.45 (bd,  $J = 1.8$  Hz, 1H);  $^{13}\text{C}$  NMR (125 MHz,  $\text{CDCl}_3$ )  $\delta$  41.0, 71.3, 78.8, 91.1, 110.1, 110.5, 126.8, 128.6, 136.3, 143.2, 149.4; HRMS (ESI) calcd for  $\text{C}_{14}\text{H}_{16}\text{NNaO}_3$  ( $\text{M}+\text{H}$ ) $^+$  268.0950, found 268.0948

## 6. NMR Spectra

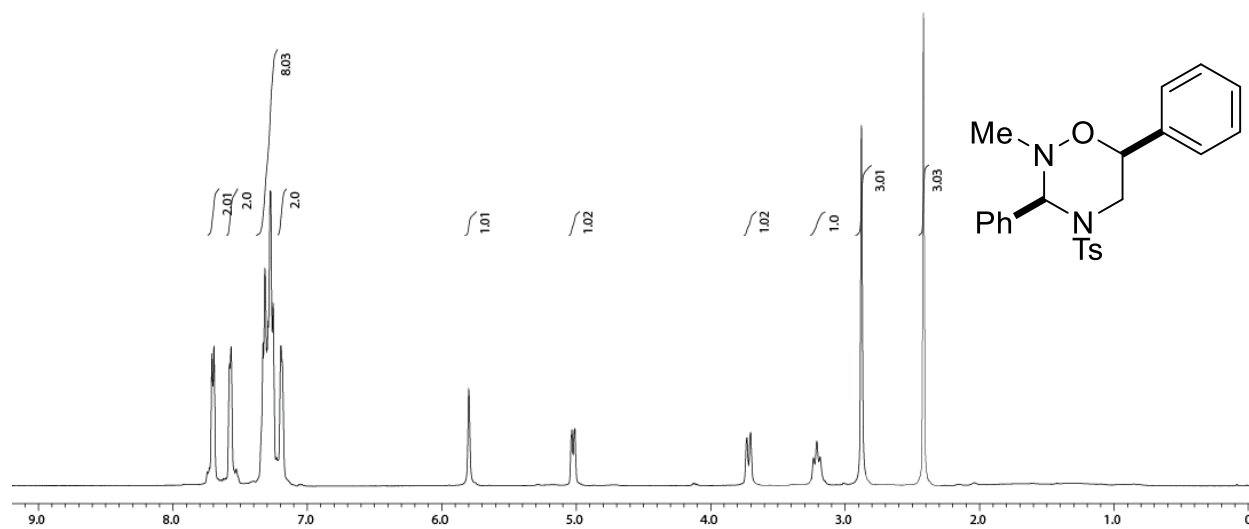

Figure 4:  $^1\text{H}$  NMR spectrum **3a** at 55 °C ( $\text{CDCl}_3$ , 500 MHz)

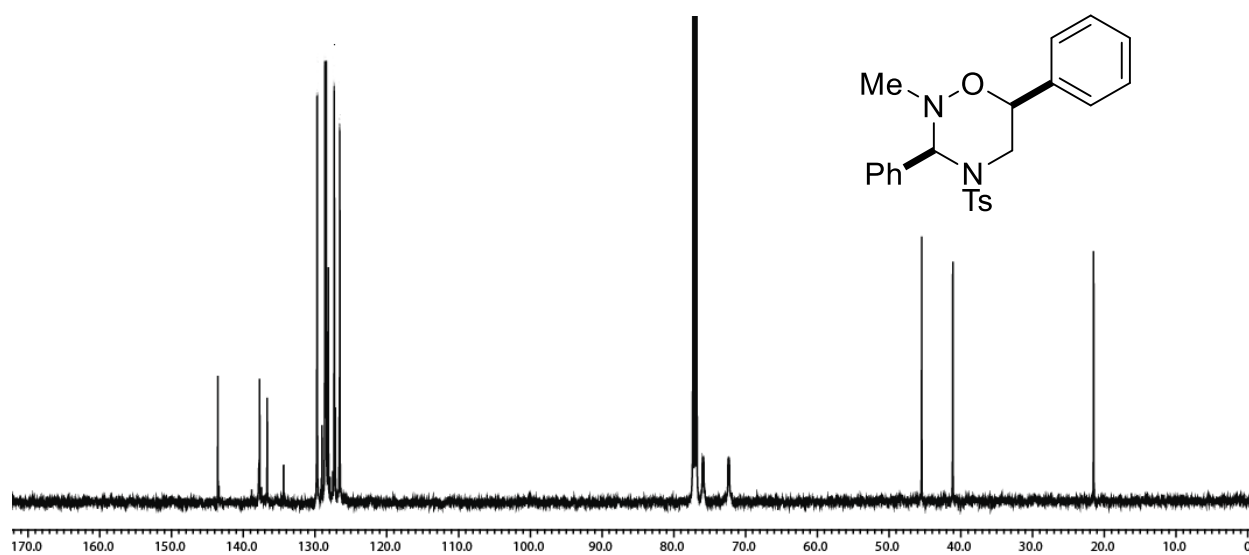

Figure 5:  $^{13}\text{C}$  NMR spectrum of **3a** at 55 °C ( $\text{CDCl}_3$ , 125 MHz)

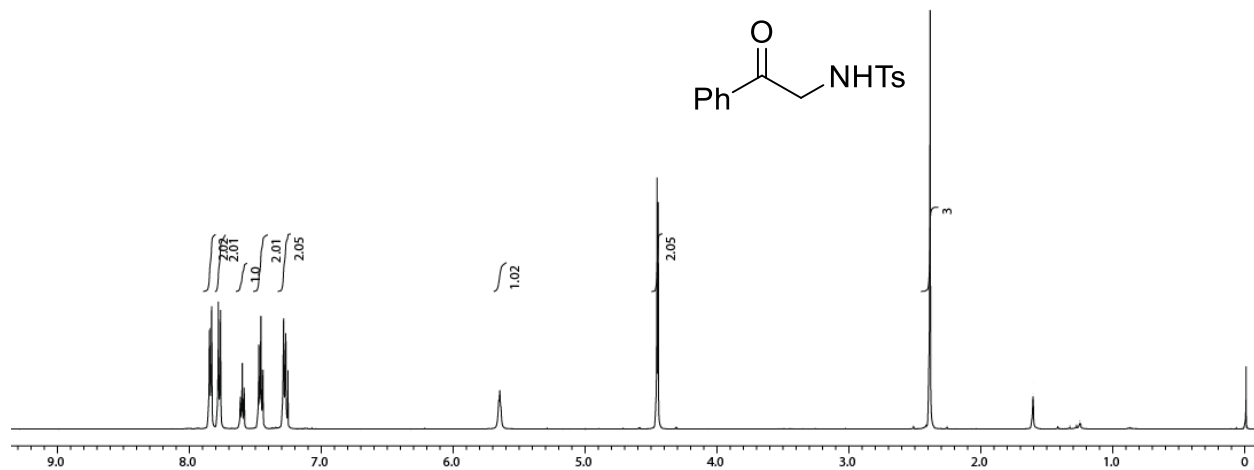

Figure 6: <sup>1</sup>H NMR spectrum of **4a** at 55 °C (CDCl<sub>3</sub>, 500 MHz)

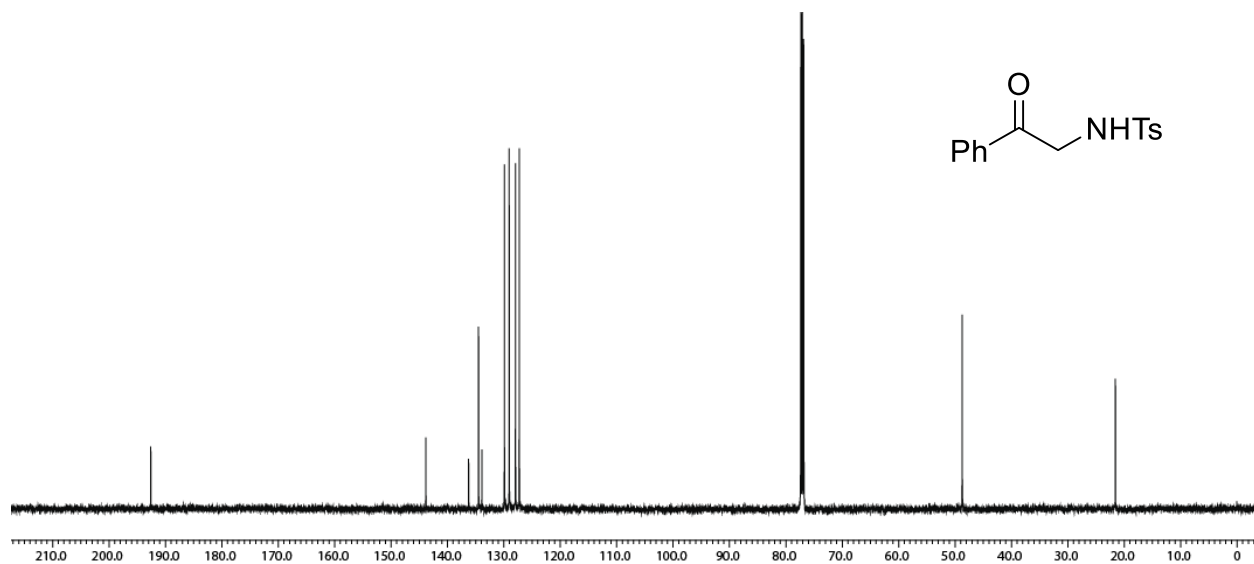

Figure 7: <sup>13</sup>C NMR spectrum of **4a** at 55 °C (CDCl<sub>3</sub>, 125 MHz)



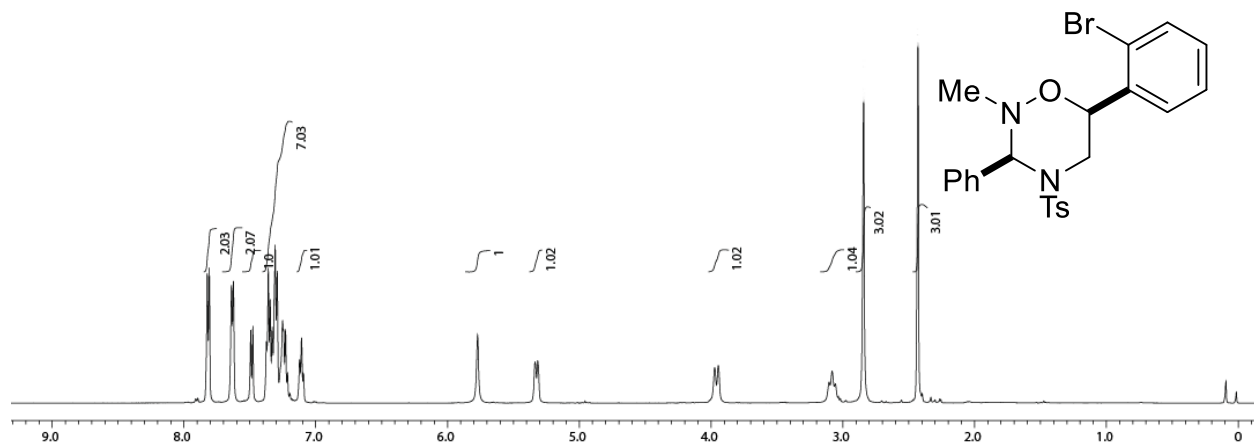

Figure 8:  $^1\text{H}$  NMR spectrum of **3b** at 55 °C ( $\text{CDCl}_3$ , 500 MHz)

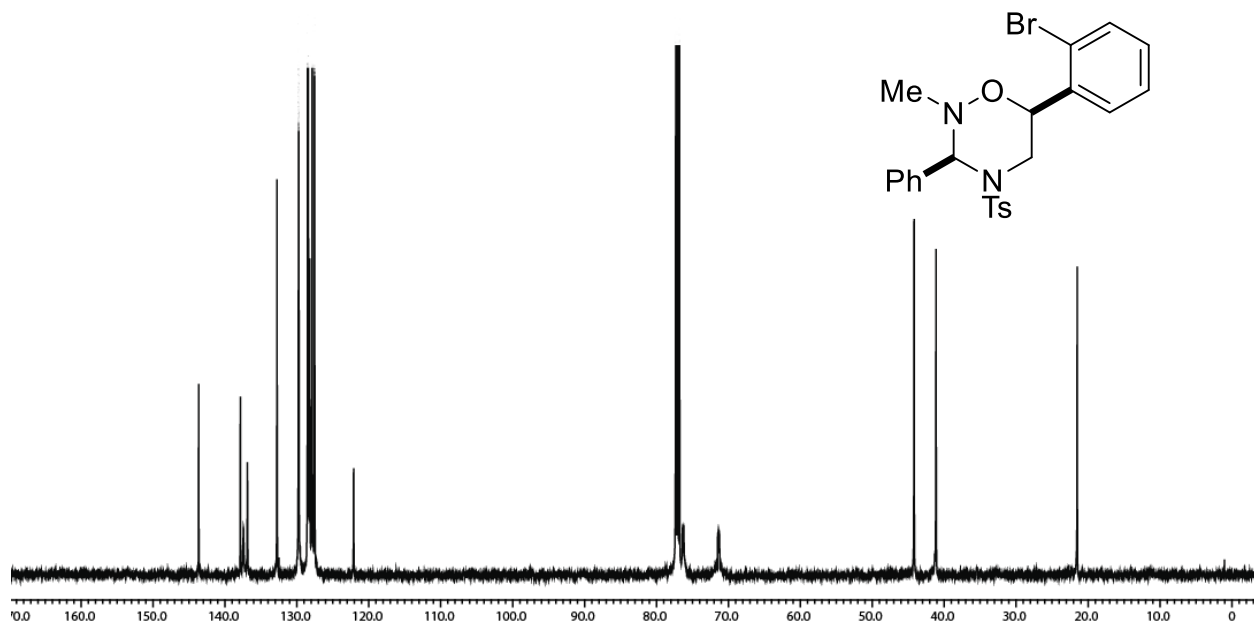

Figure 9:  $^{13}\text{C}$  NMR spectrum of **3b** at 55 °C ( $\text{CDCl}_3$ , 125 MHz)

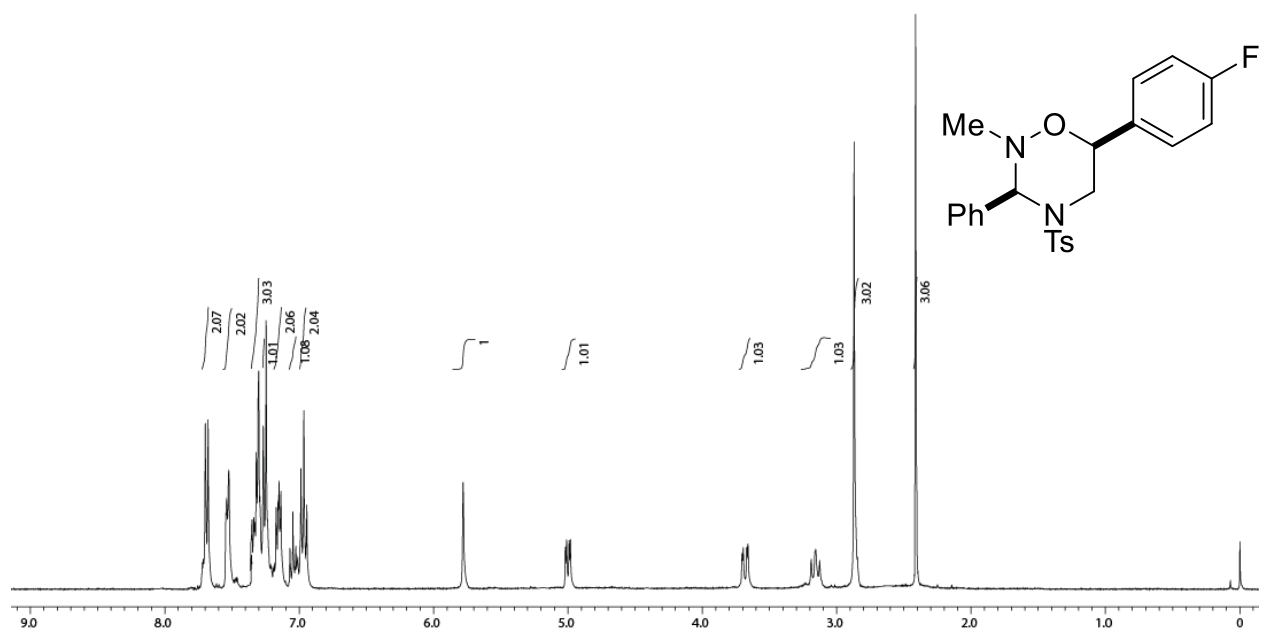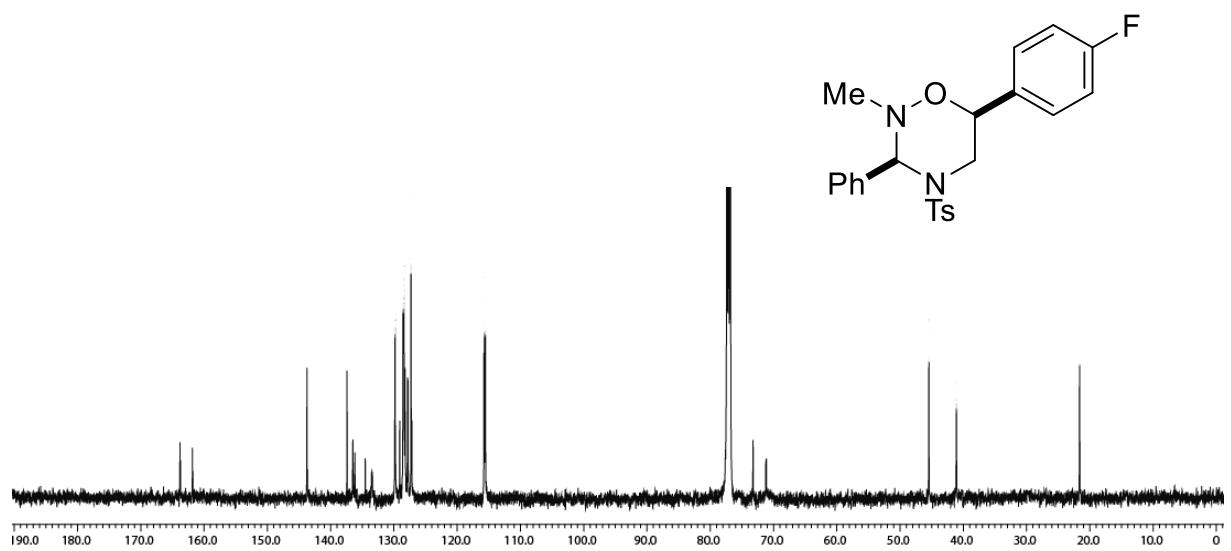

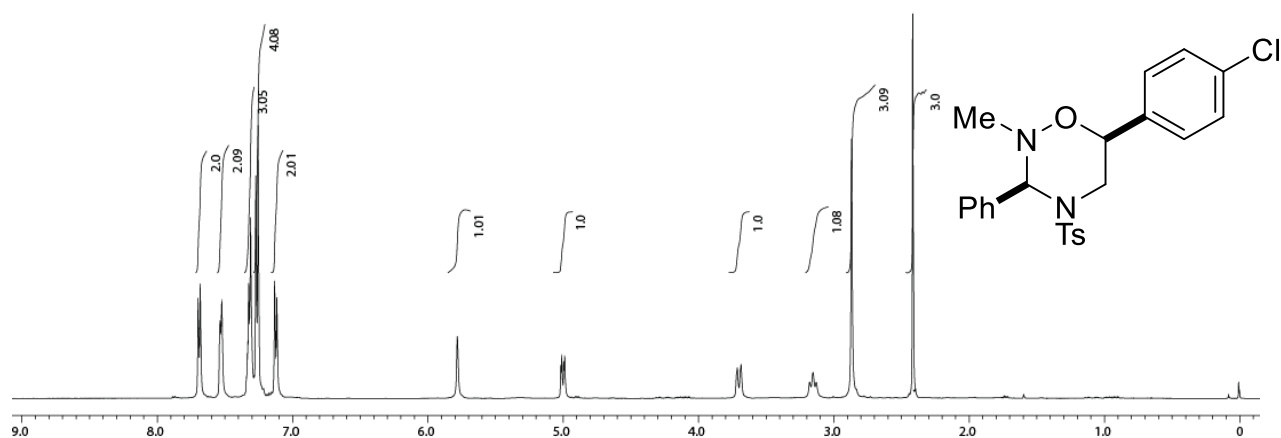

Figure 12:  $^1\text{H}$  NMR spectrum of **3d** at 55 °C ( $\text{CDCl}_3$ , 500 MHz)

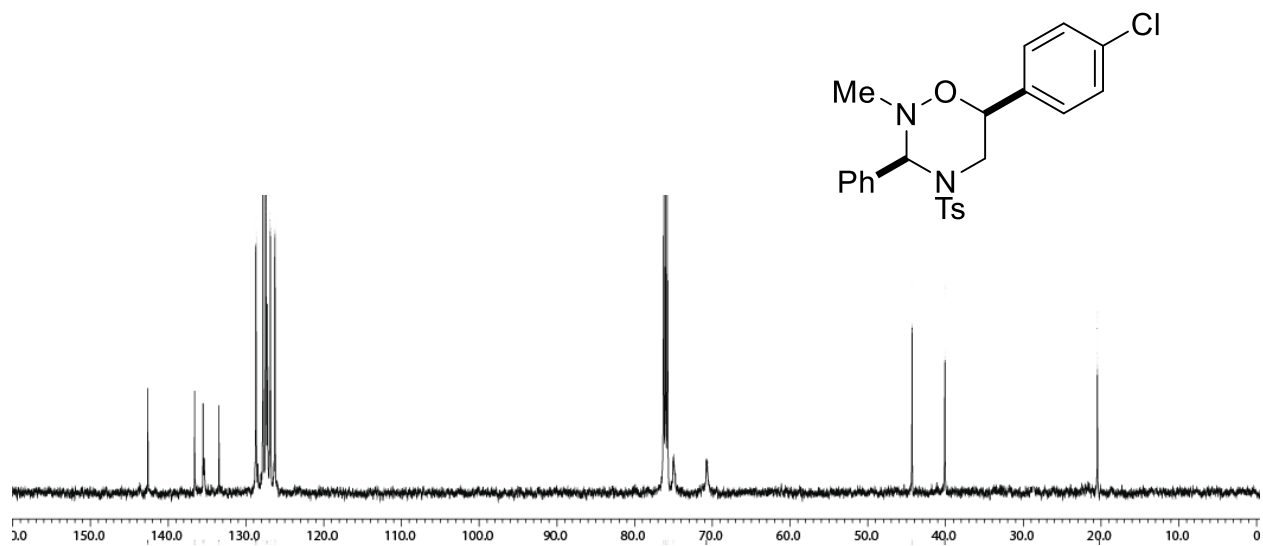

Figure 13:  $^{13}\text{C}$  NMR spectrum of **3d** at 55 °C ( $\text{CDCl}_3$ , 125 MHz)

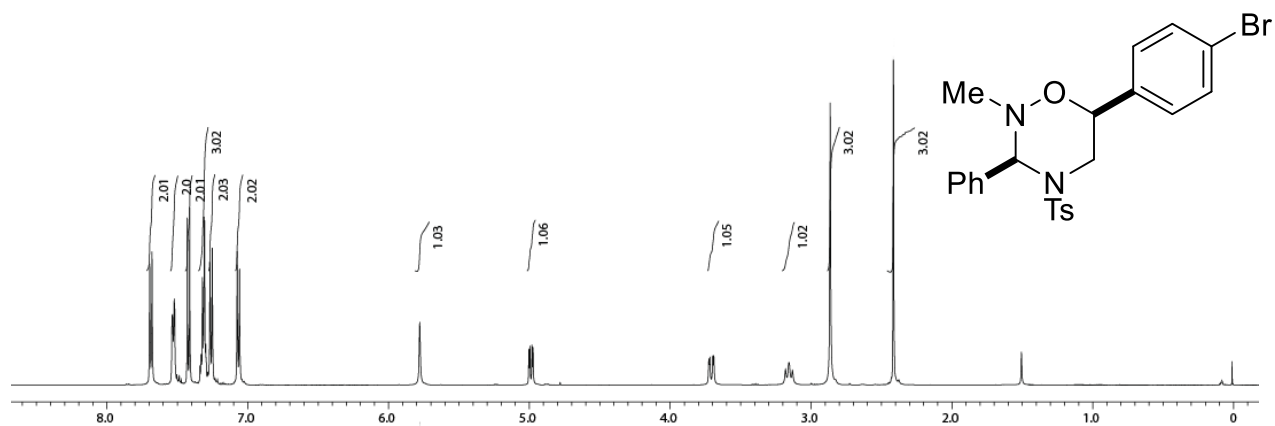

Figure 14:  $^1\text{H}$  NMR spectrum of **3e** at 55 °C ( $\text{CDCl}_3$ , 500 MHz)

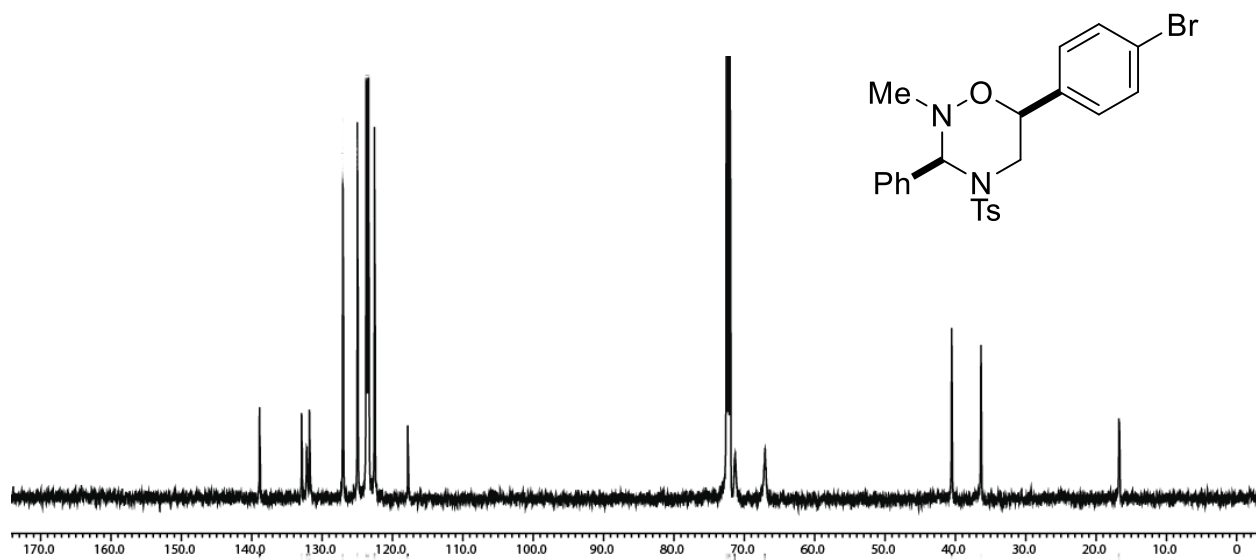

Figure 15:  $^{13}\text{C}$  NMR spectrum of **3e** at 55 °C ( $\text{CDCl}_3$ , 125 MHz)

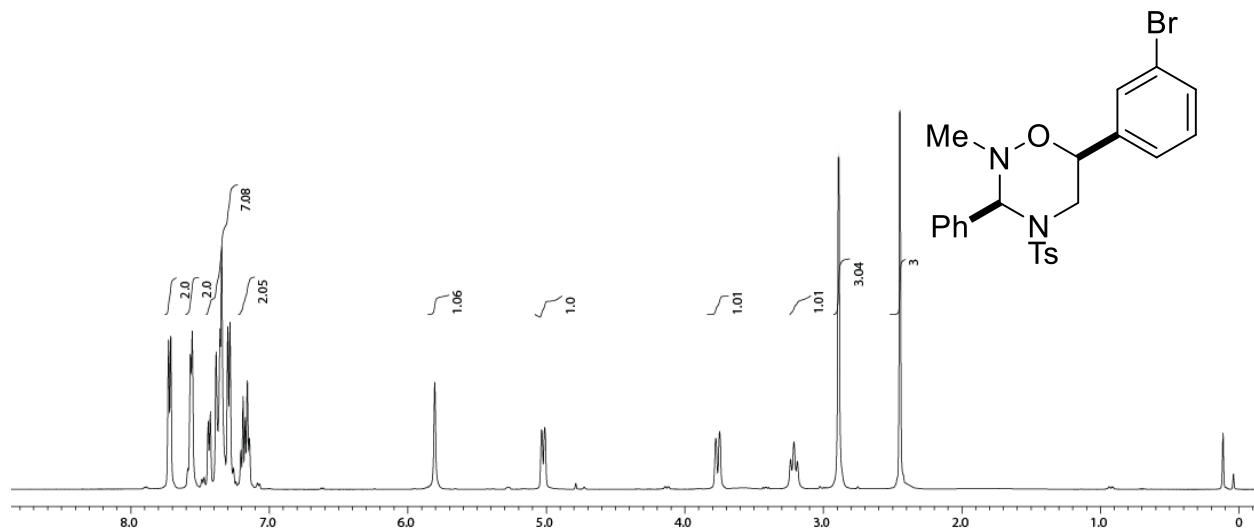

Figure 16:  $^1\text{H}$  NMR spectrum of **3f** at 55 °C ( $\text{CDCl}_3$ , 500 MHz)

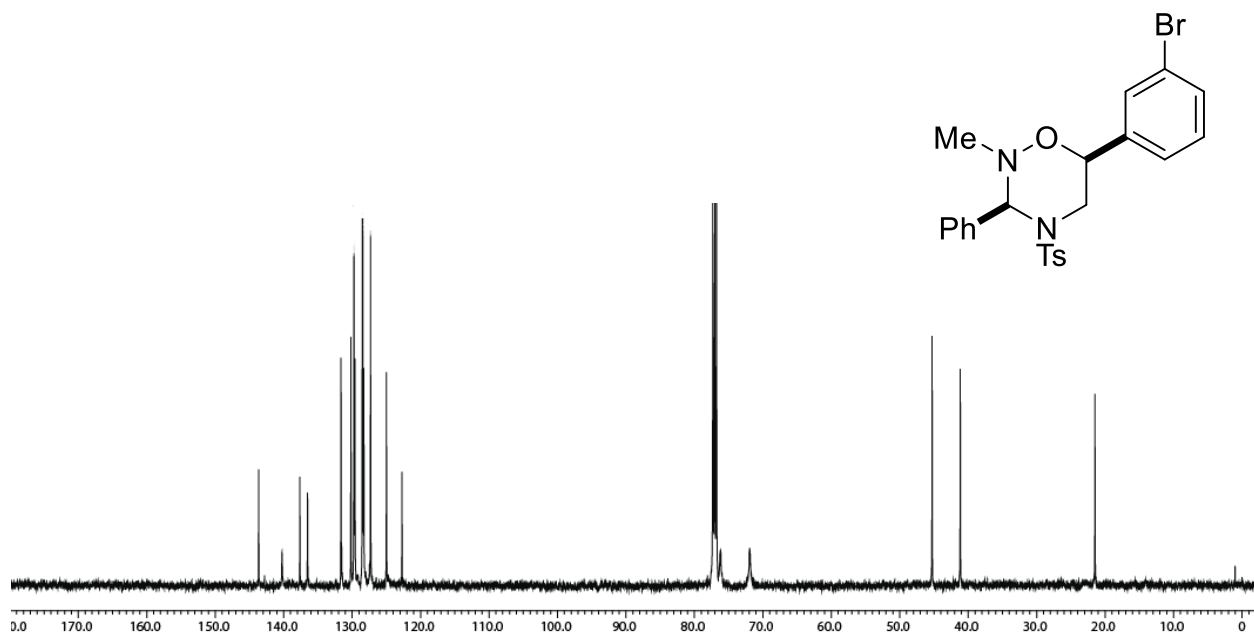

Figure 17:  $^{13}\text{C}$  NMR spectrum of **3f** at 55 °C ( $\text{CDCl}_3$ , 125 MHz)

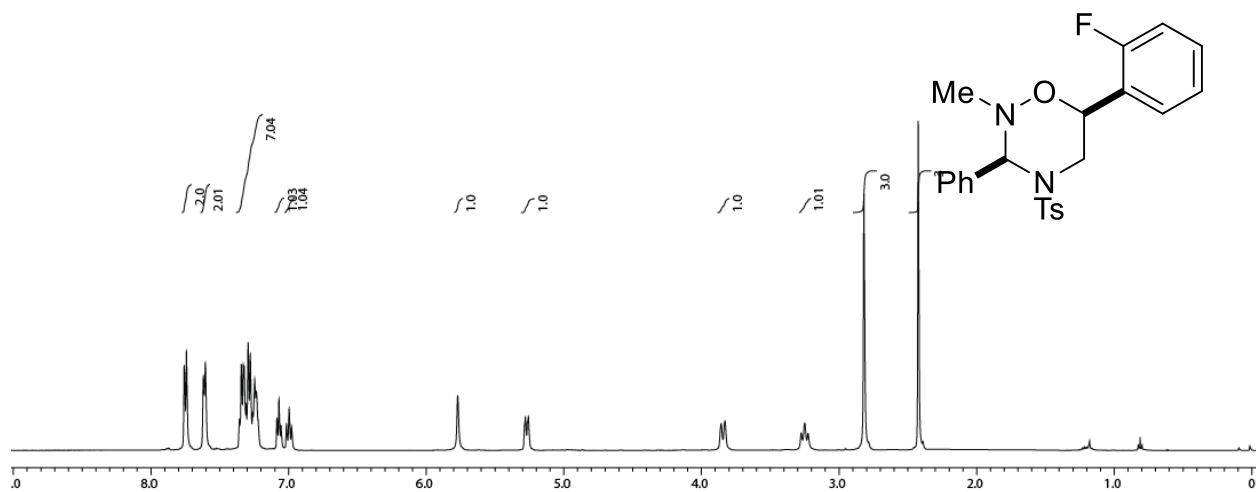

Figure 18:  $^1\text{H}$  NMR spectrum of **3g** at 55 °C ( $\text{CDCl}_3$ , 500 MHz)

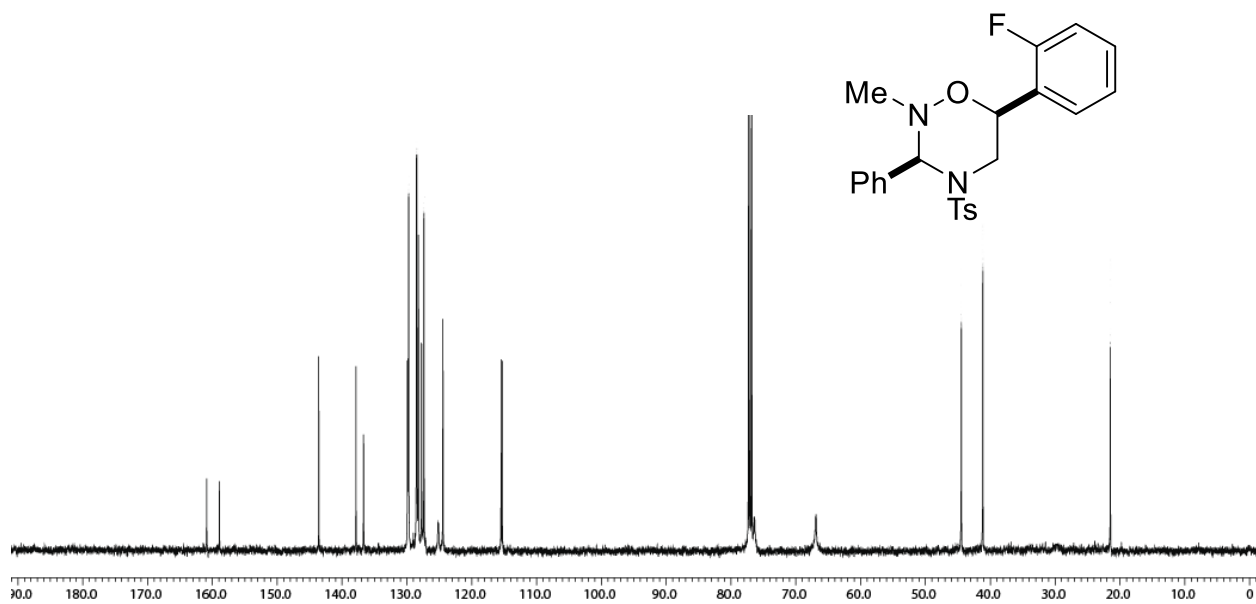

Figure 19:  $^{13}\text{C}$  NMR spectrum of **3g** at 55 °C ( $\text{CDCl}_3$ , 125 MHz)

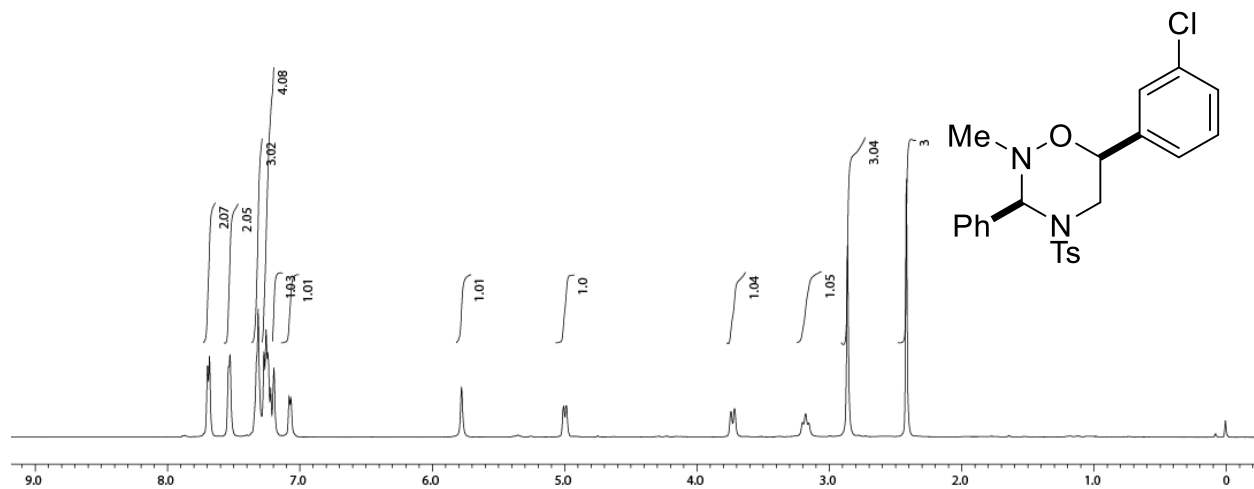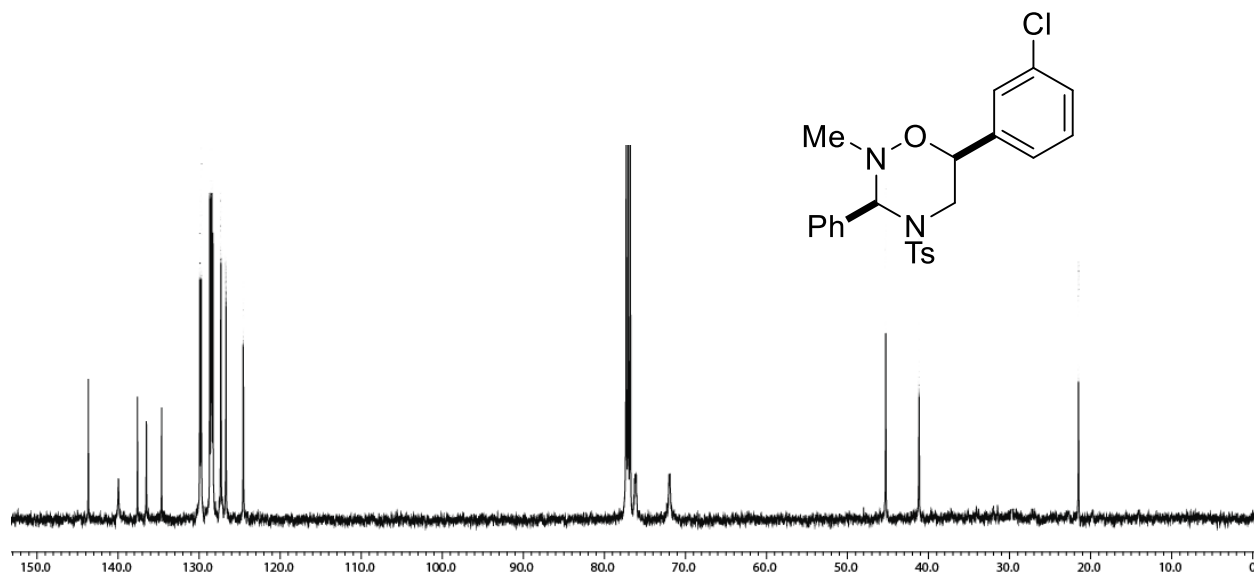

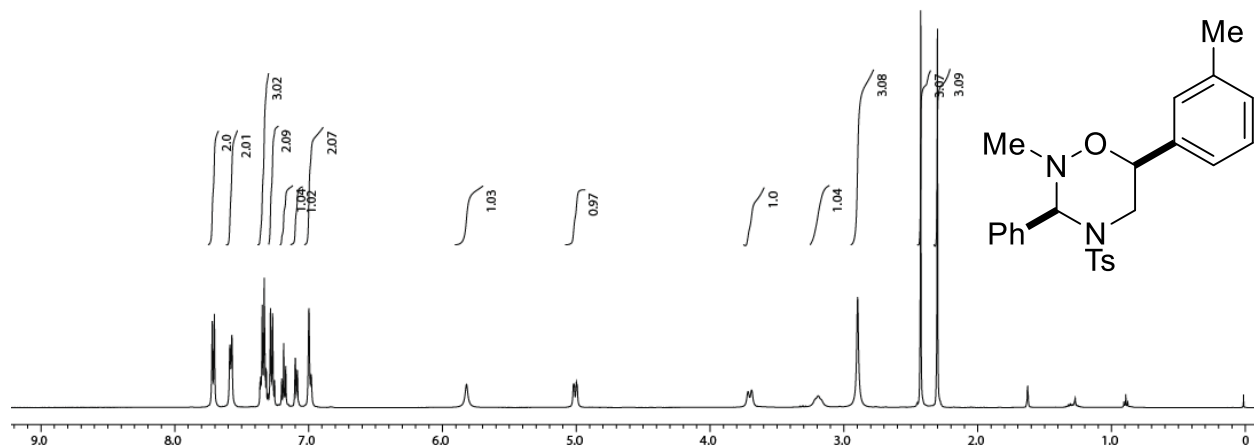

Figure 22:  $^1\text{H}$  NMR spectrum of **3i** at 55 °C ( $\text{CDCl}_3$ , 500 MHz)

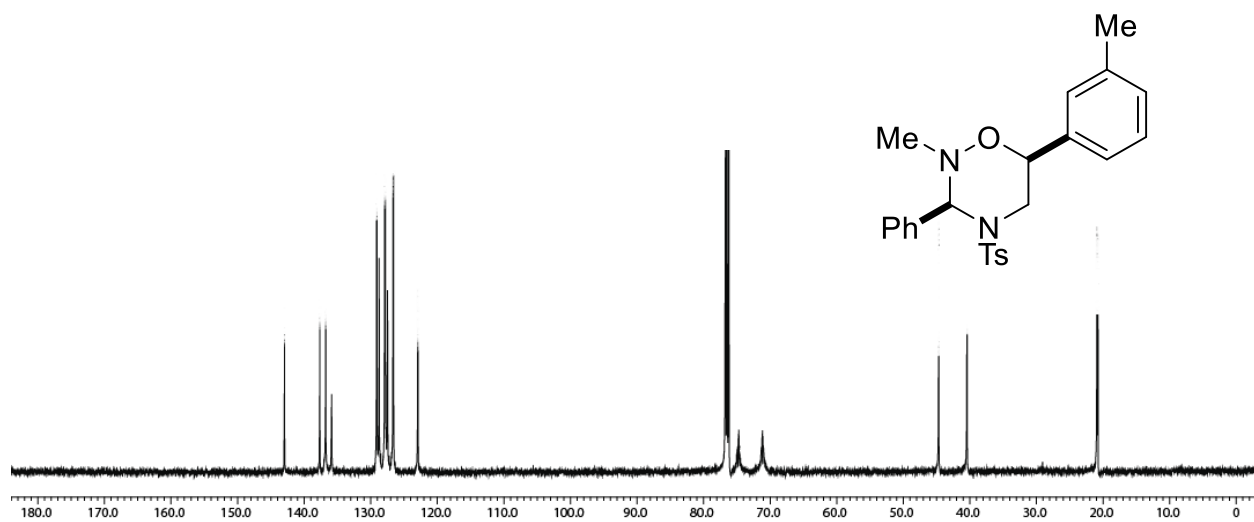

Figure 23:  $^{13}\text{C}$  NMR spectrum of **3i** at 55 °C ( $\text{CDCl}_3$ , 125 MHz)



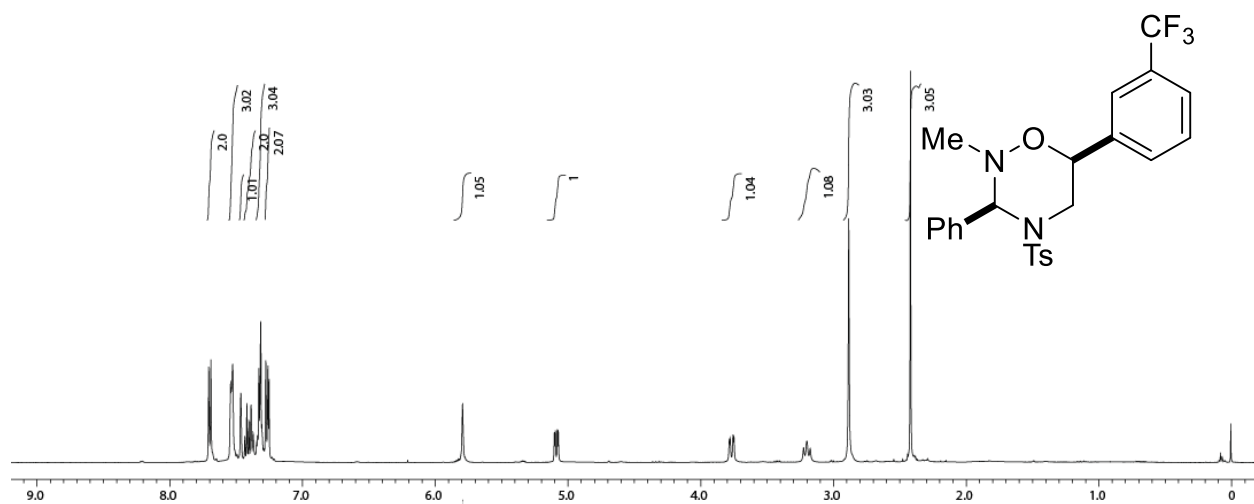

Figure 24:  $^1\text{H}$  NMR spectrum of **3j** at 55 °C ( $\text{CDCl}_3$ , 500 MHz)

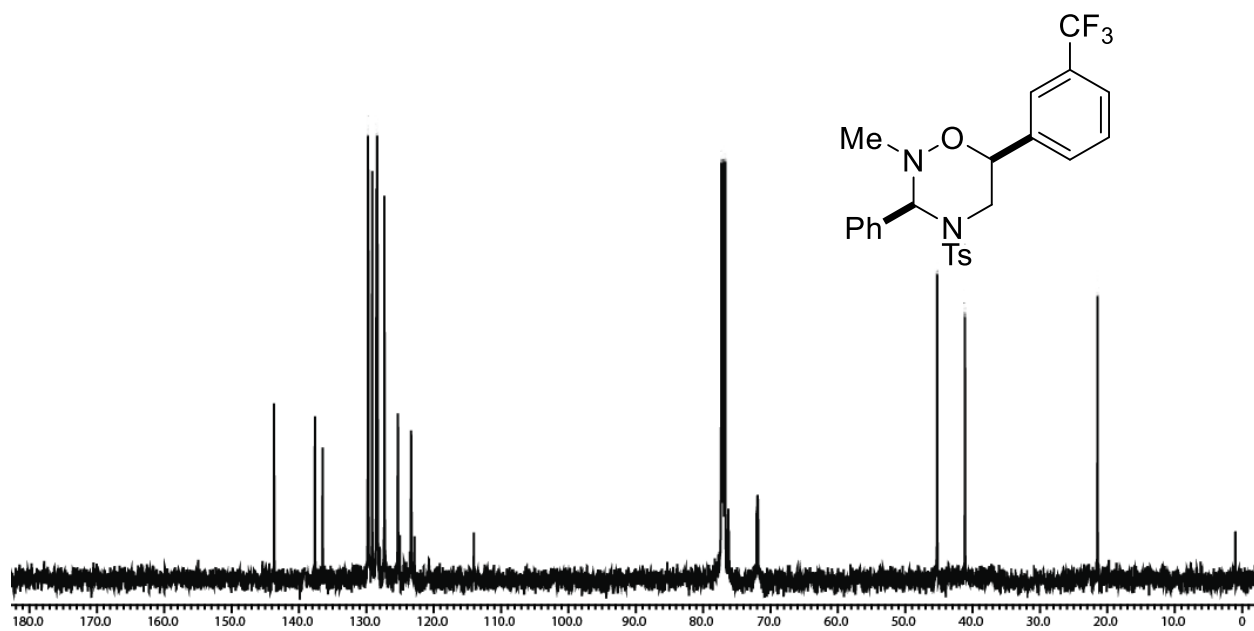

Figure 25:  $^{13}\text{C}$  NMR spectrum of **3j** at 55 °C ( $\text{CDCl}_3$ , 125 MHz)

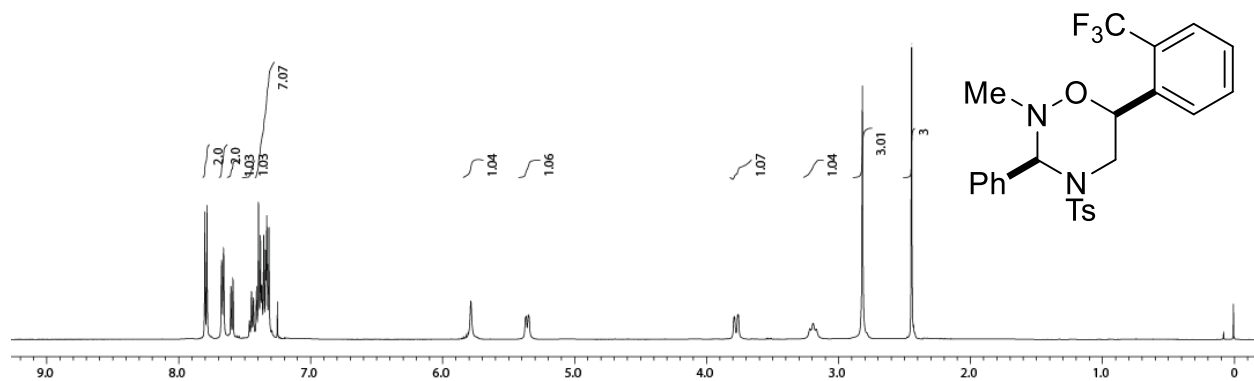

Figure 26:  $^1\text{H}$  NMR spectrum of **3k** at 55 °C ( $\text{CDCl}_3$ , 500 MHz)

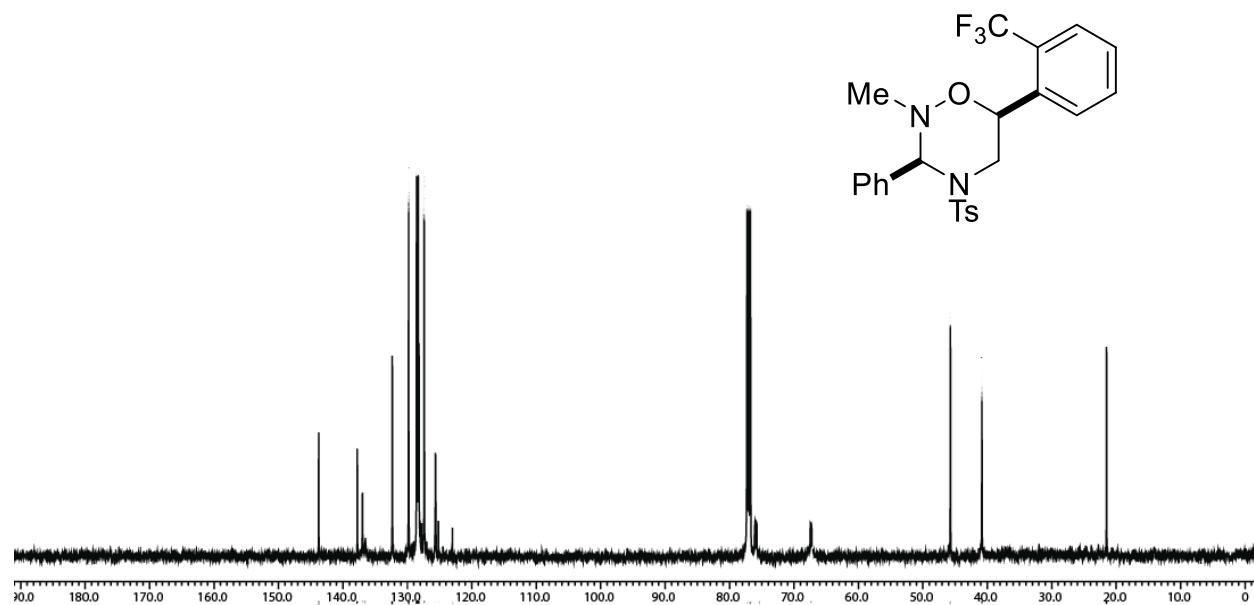

Figure 27:  $^{13}\text{C}$  NMR spectrum of **3k** at 55 °C ( $\text{CDCl}_3$ , 125 MHz)

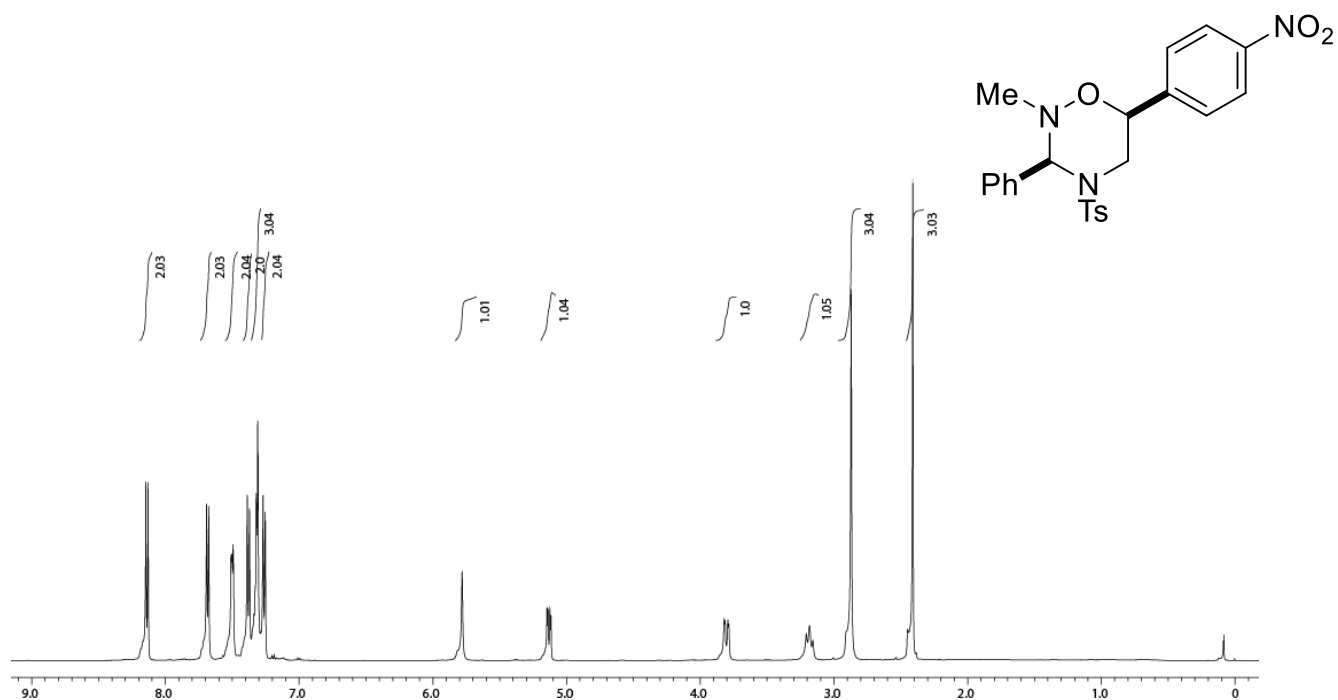

Figure 28: <sup>1</sup>H NMR spectrum of **3I** at 55 °C (CDCl<sub>3</sub>, 500 MHz)

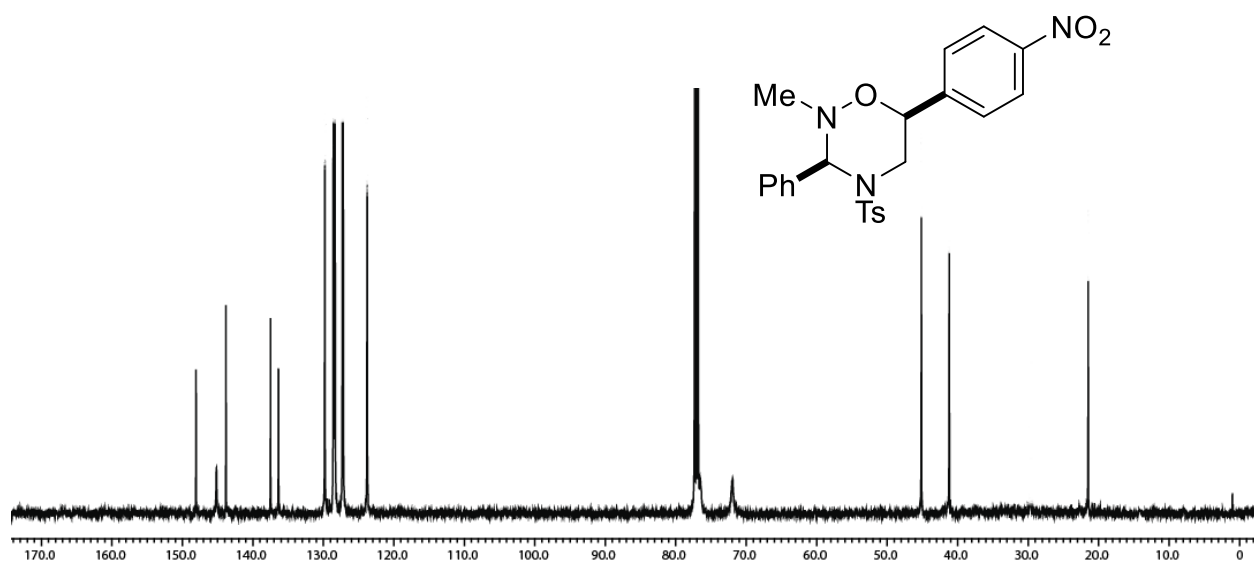

Figure 29: <sup>13</sup>C NMR spectrum of **3I** at 55 °C (CDCl<sub>3</sub>, 125 MHz)

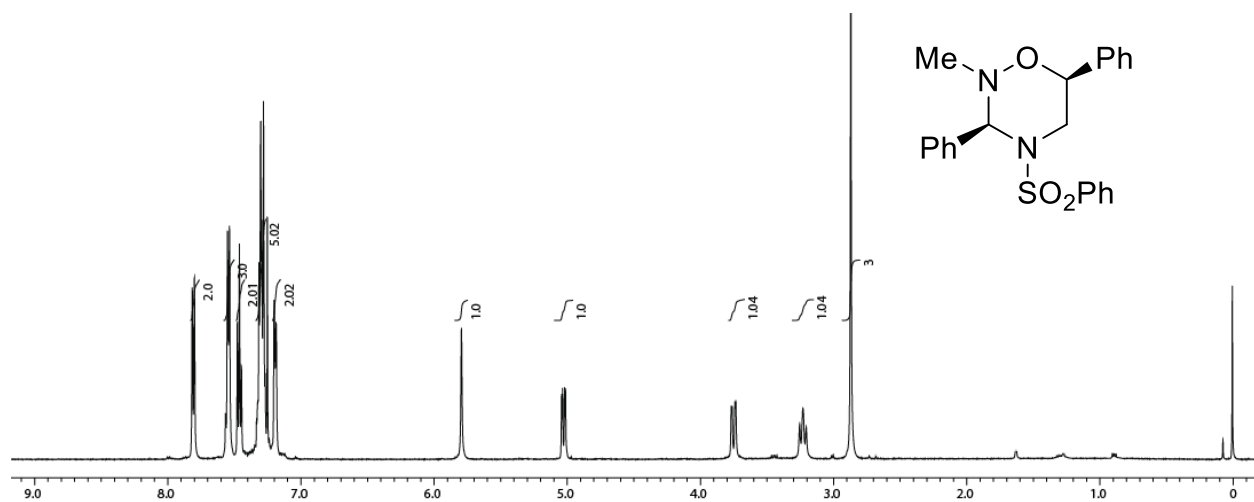

Figure 30.  $^1\text{H}$  NMR spectrum of **3m** at 55 °C ( $\text{CDCl}_3$ , 500 MHz)

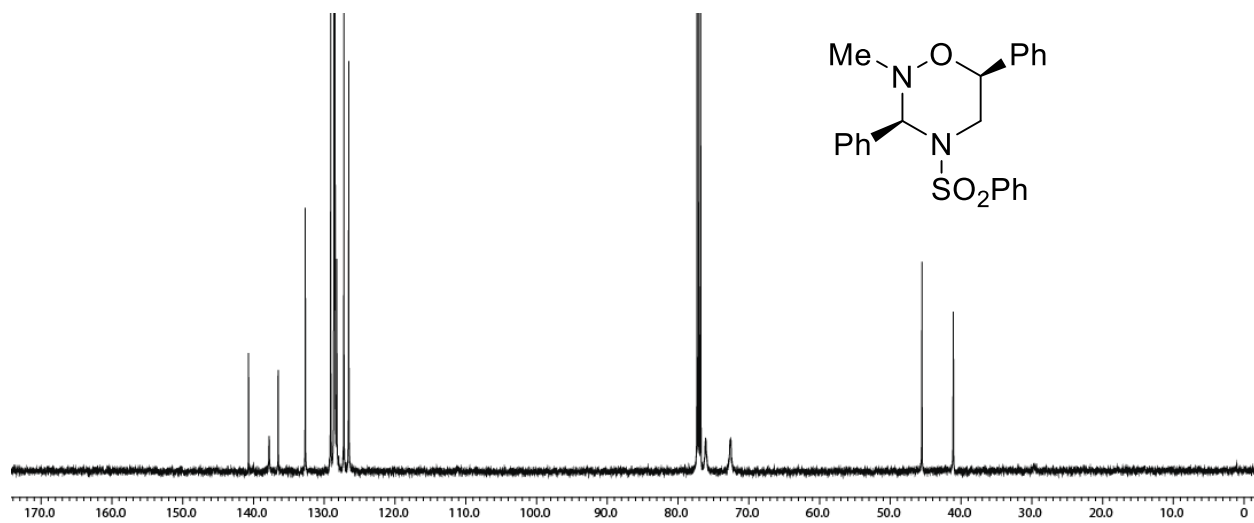

Figure 31:  $^{13}\text{C}$  NMR spectrum of **3m** at 55 °C ( $\text{CDCl}_3$ , 125 MHz)

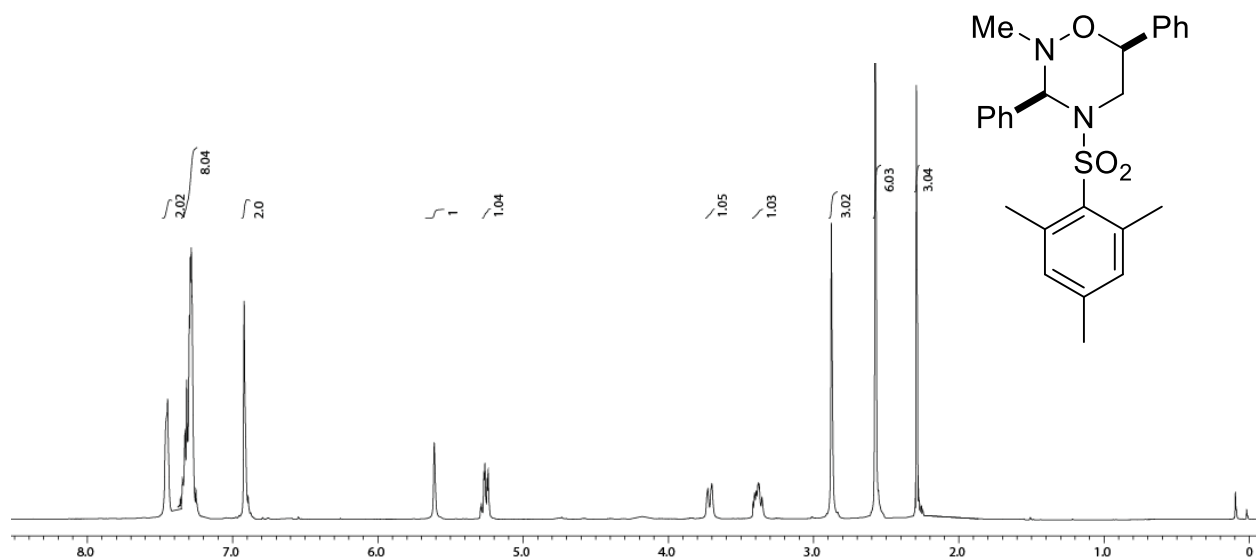

Figure 32.  $^1\text{H}$  NMR spectrum of **3n** at 55 °C ( $\text{CDCl}_3$ , 500 MHz)

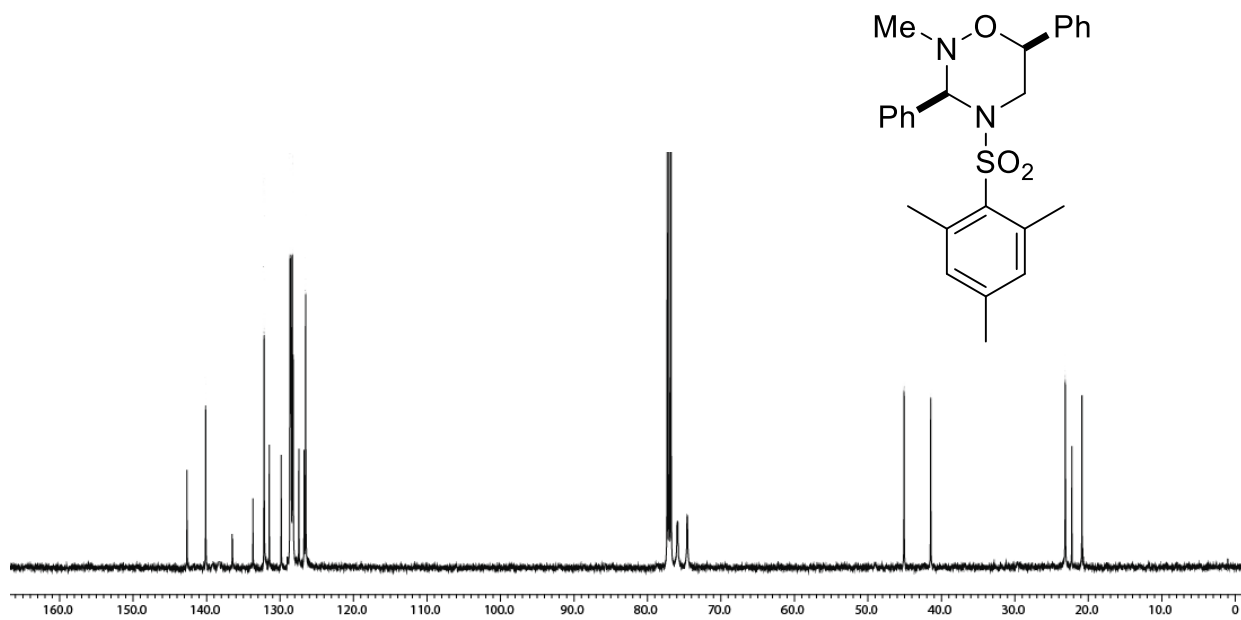

Figure 33:  $^{13}\text{C}$  NMR spectrum of **3n** at 55 °C ( $\text{CDCl}_3$ , 125 MHz)

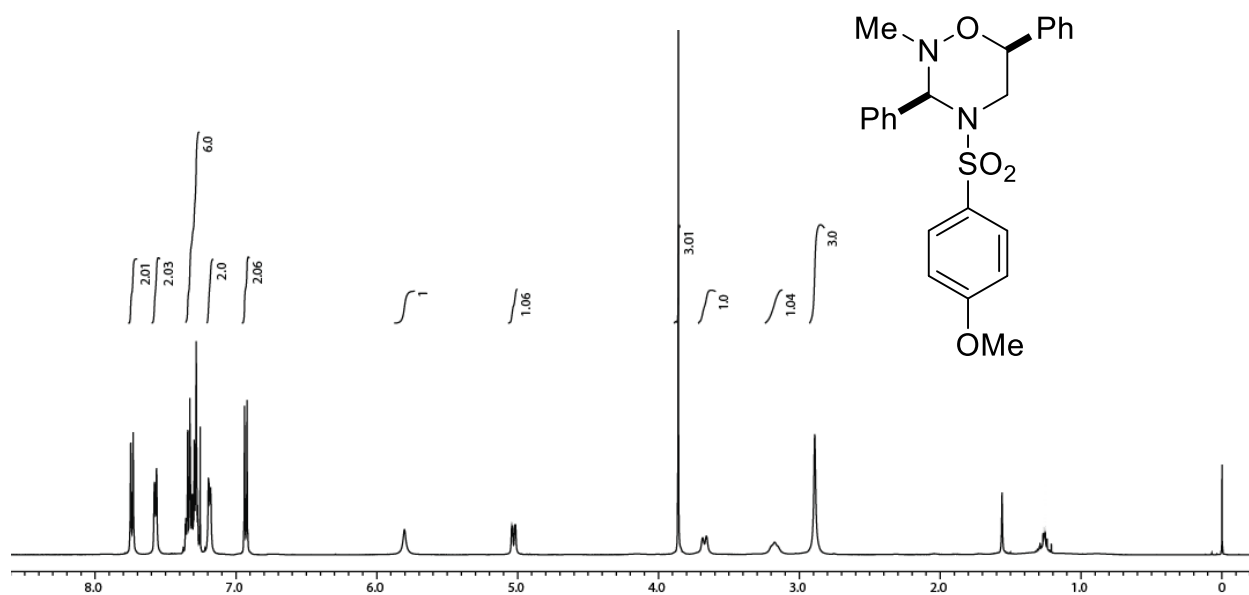

Figure 34.  $^1\text{H}$  NMR spectrum of **3o** at 55 °C ( $\text{CDCl}_3$ , 500 MHz)

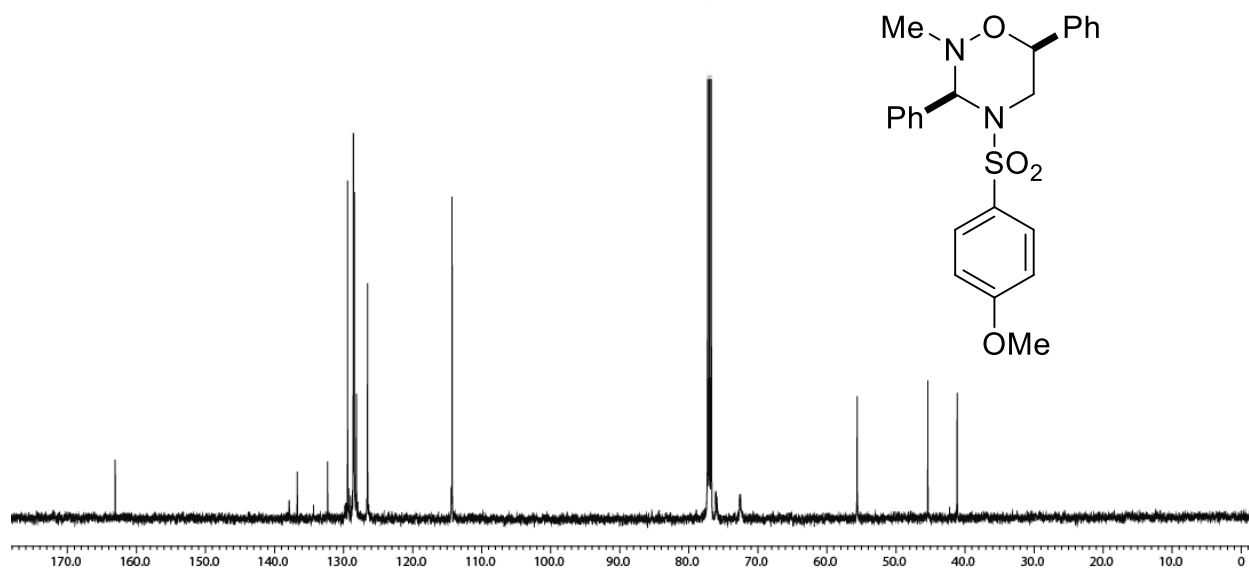

Figure 35:  $^{13}\text{C}$  NMR spectrum of **3o** at 55 °C ( $\text{CDCl}_3$ , 125 MHz)

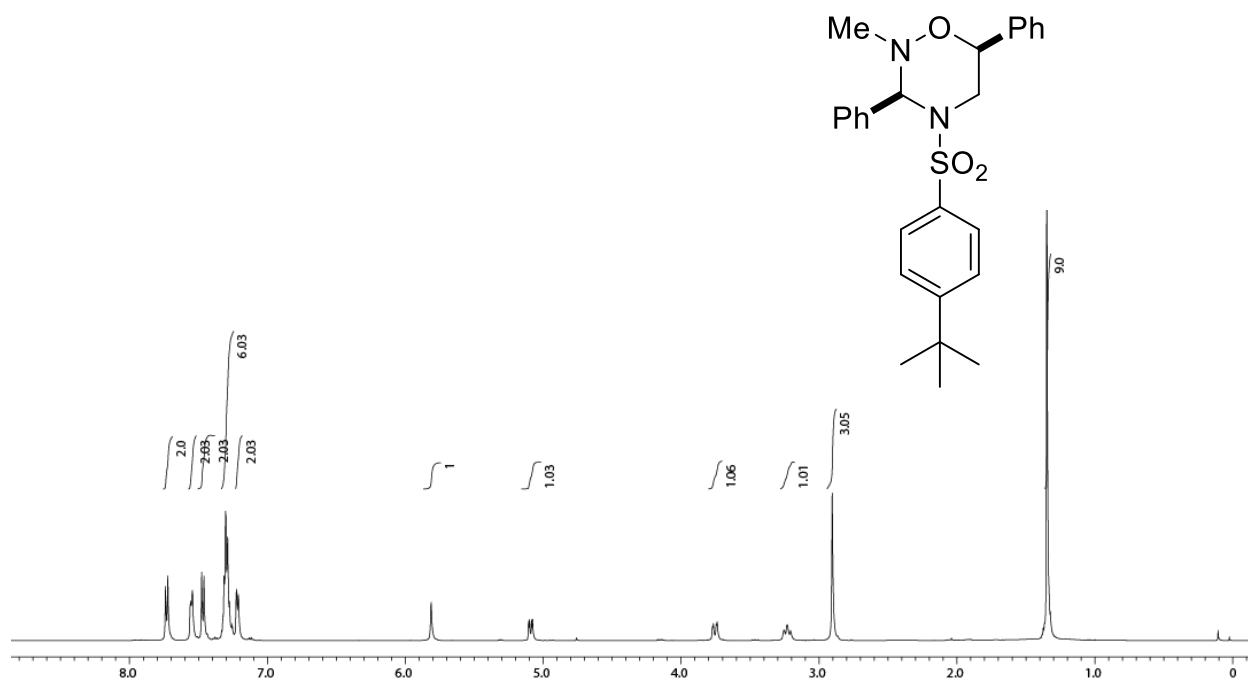

Figure 36.  $^1\text{H}$  NMR spectrum of **3p** at 55 °C ( $\text{CDCl}_3$ , 500 MHz)

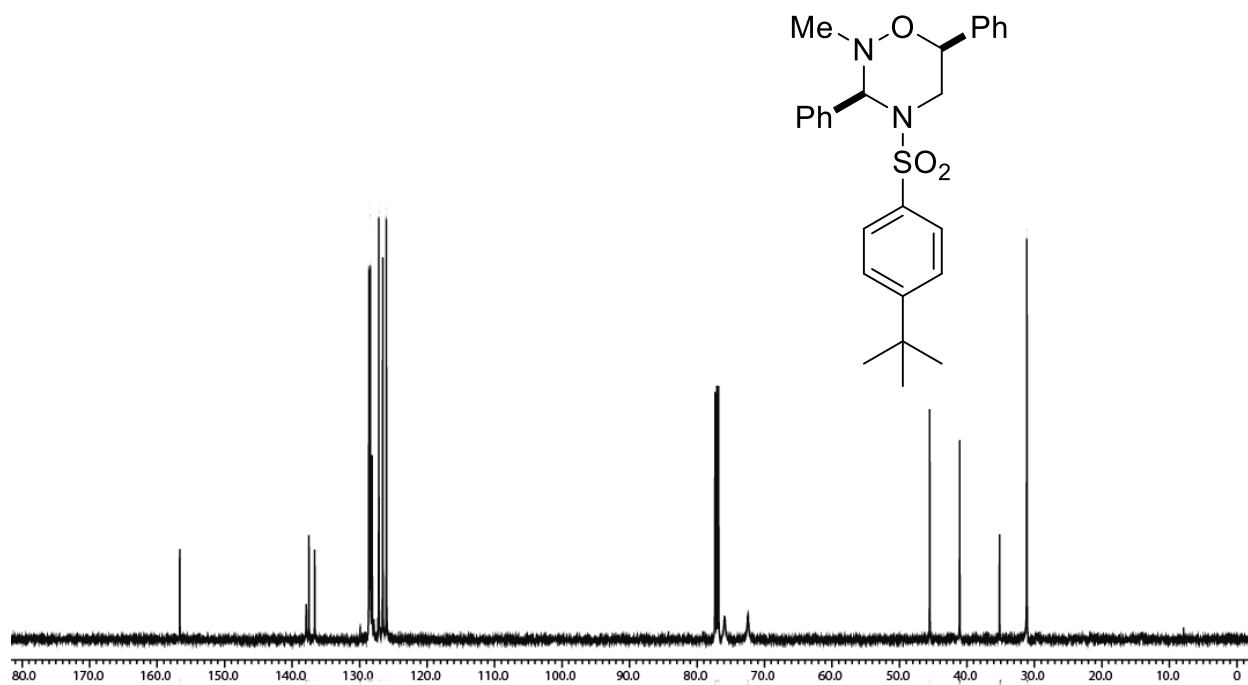

Figure 37:  $^{13}\text{C}$  NMR spectrum of **3p** at 55 °C ( $\text{CDCl}_3$ , 125 MHz)

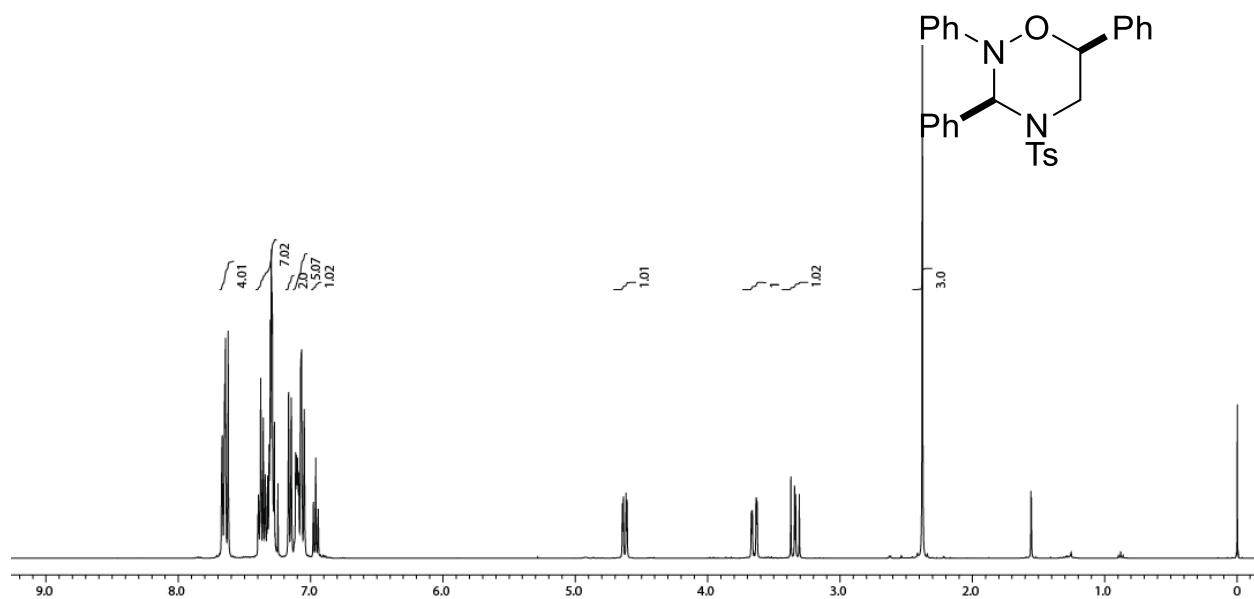

Figure 38. <sup>1</sup>H NMR spectrum of **3pa** at 55 °C (CDCl<sub>3</sub>, 500 MHz)

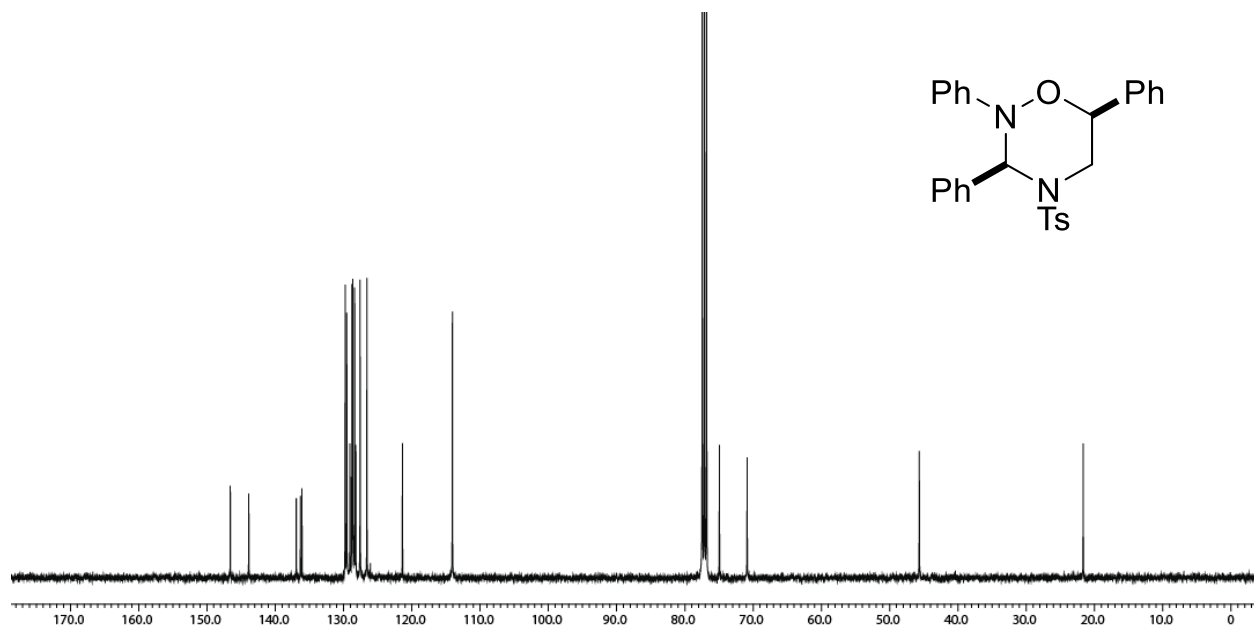

Figure 39: <sup>13</sup>C NMR spectrum of **3pa** at 55 °C (CDCl<sub>3</sub>, 125 MHz)



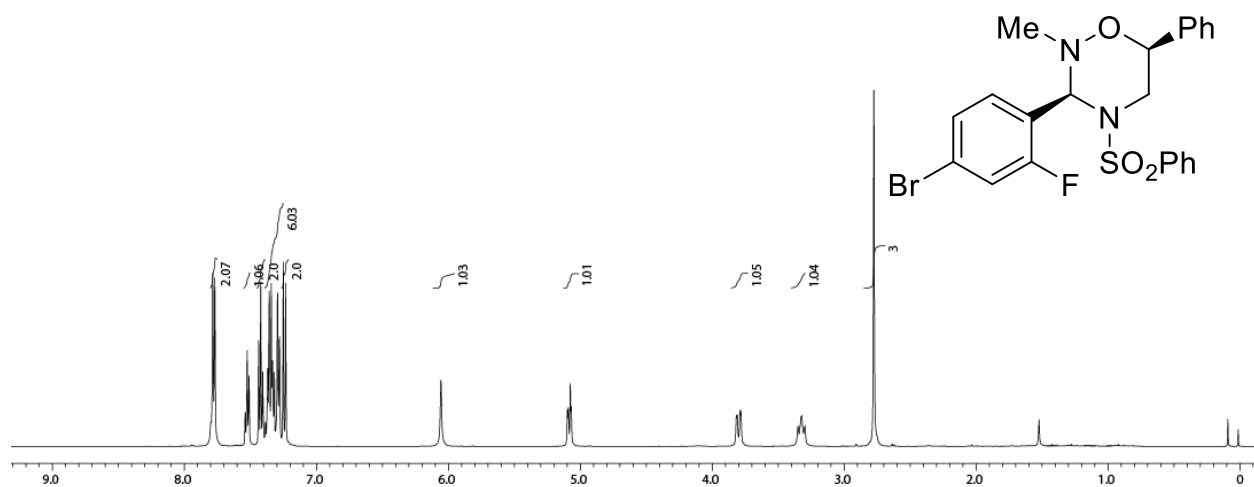

Figure 40.  $^1\text{H}$  NMR spectrum of **3q** at 55 °C ( $\text{CDCl}_3$ , 500 MHz)

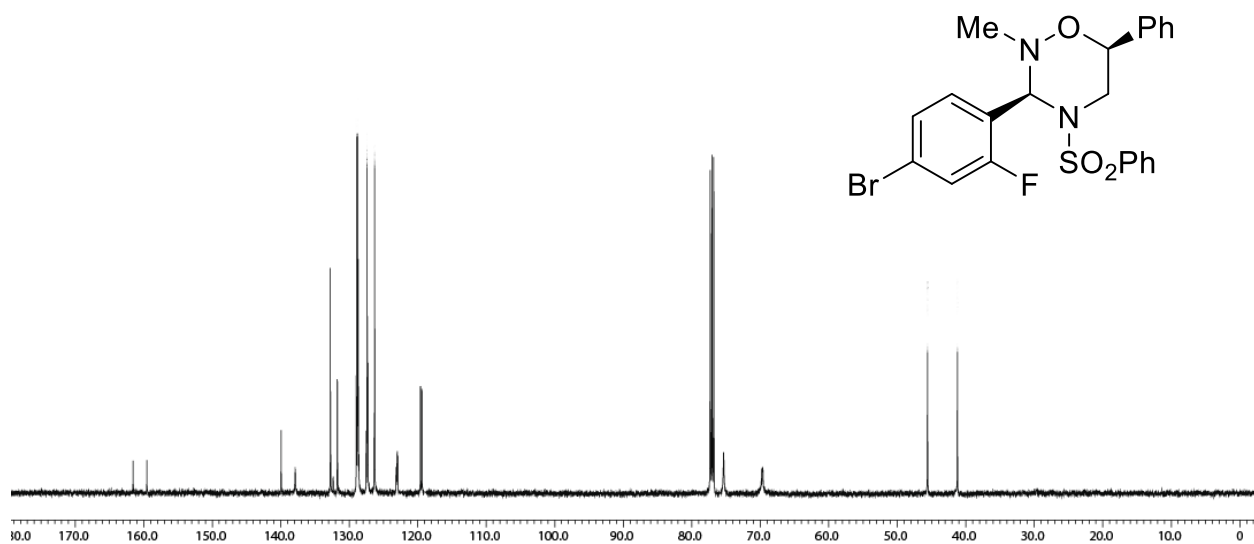

Figure 41.  $^{13}\text{C}$  NMR spectrum of **3q** at 55 °C ( $\text{CDCl}_3$ , 125 MHz)

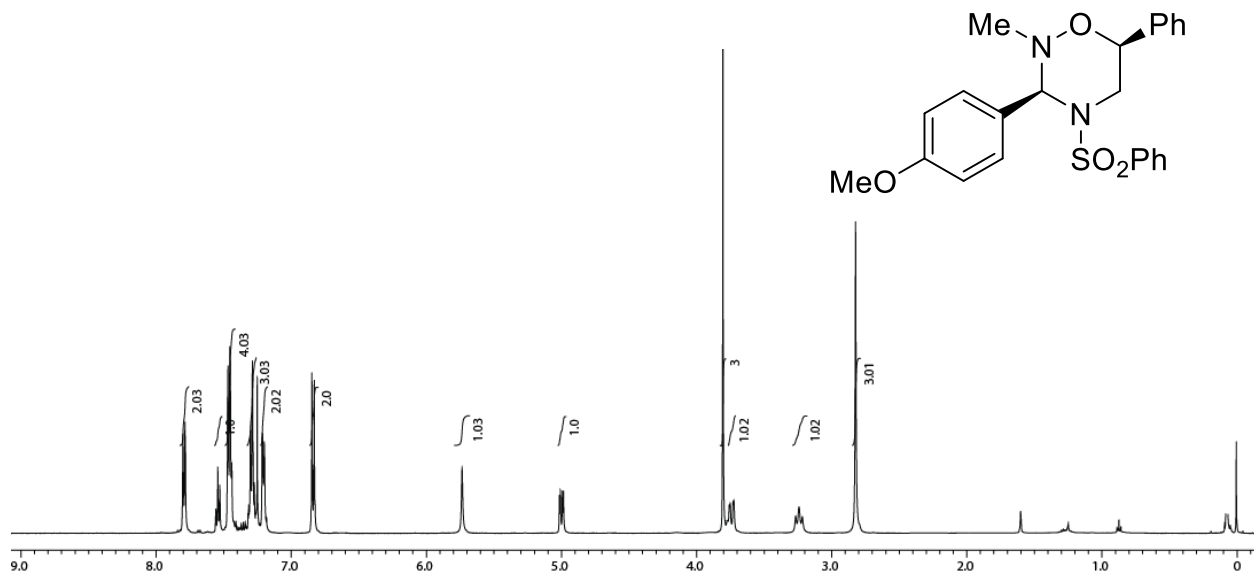

Figure 42. <sup>1</sup>H NMR spectrum of **3r** at 55 °C (CDCl<sub>3</sub>, 500 MHz)

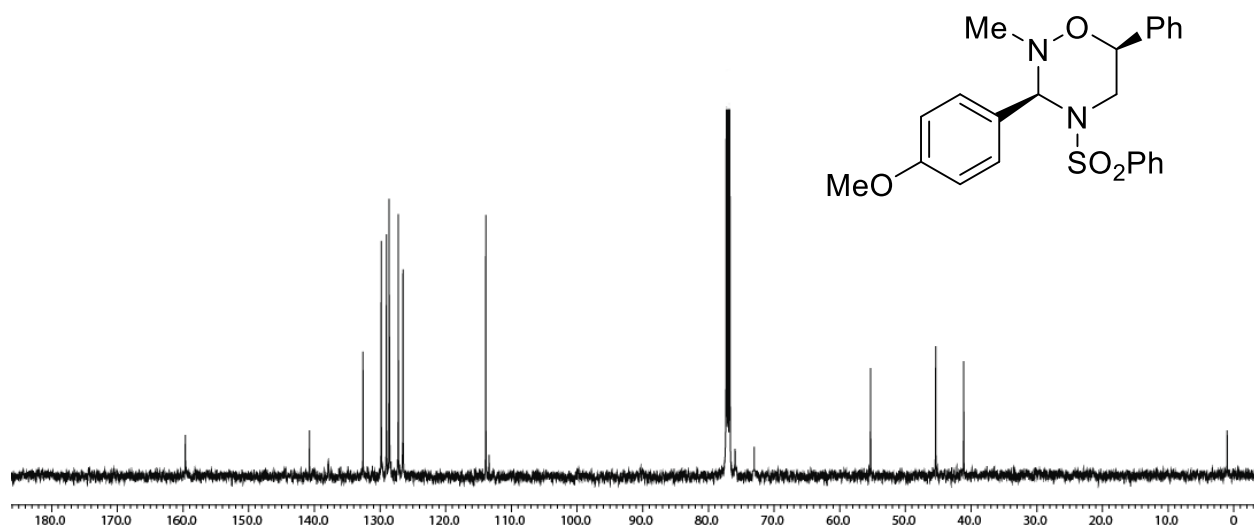

Figure 43. <sup>13</sup>C NMR spectrum of **3r** at 55 °C (CDCl<sub>3</sub>, 125 MHz)

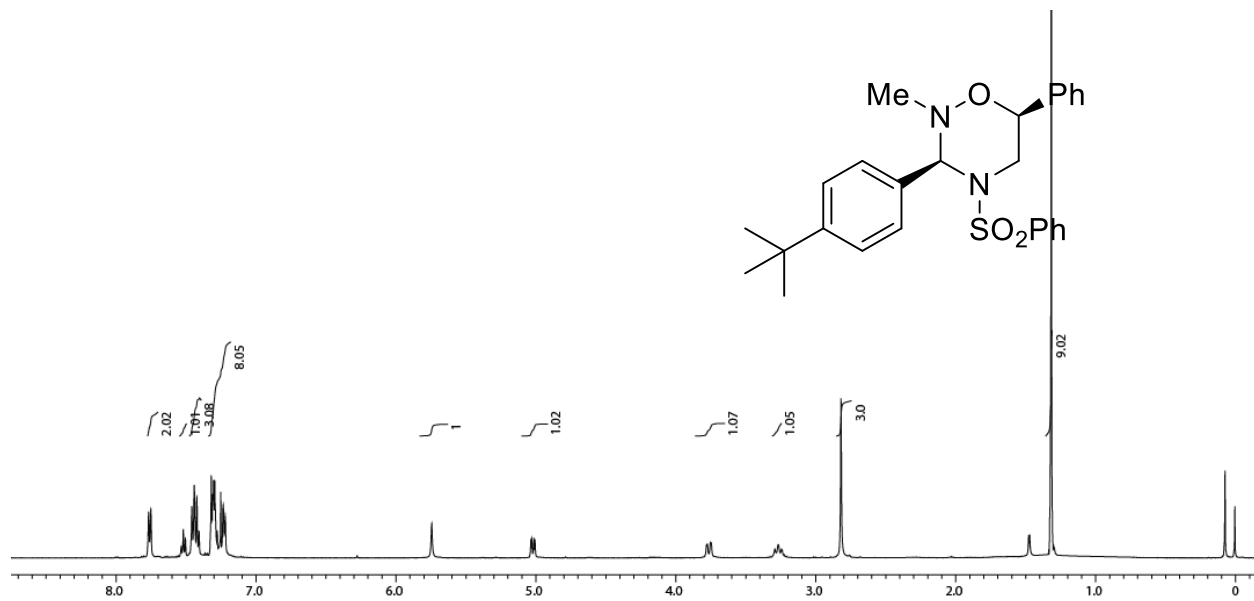

Figure 44.  $^1\text{H}$  NMR spectrum of **3s** at 55 °C ( $\text{CDCl}_3$ , 500 MHz)

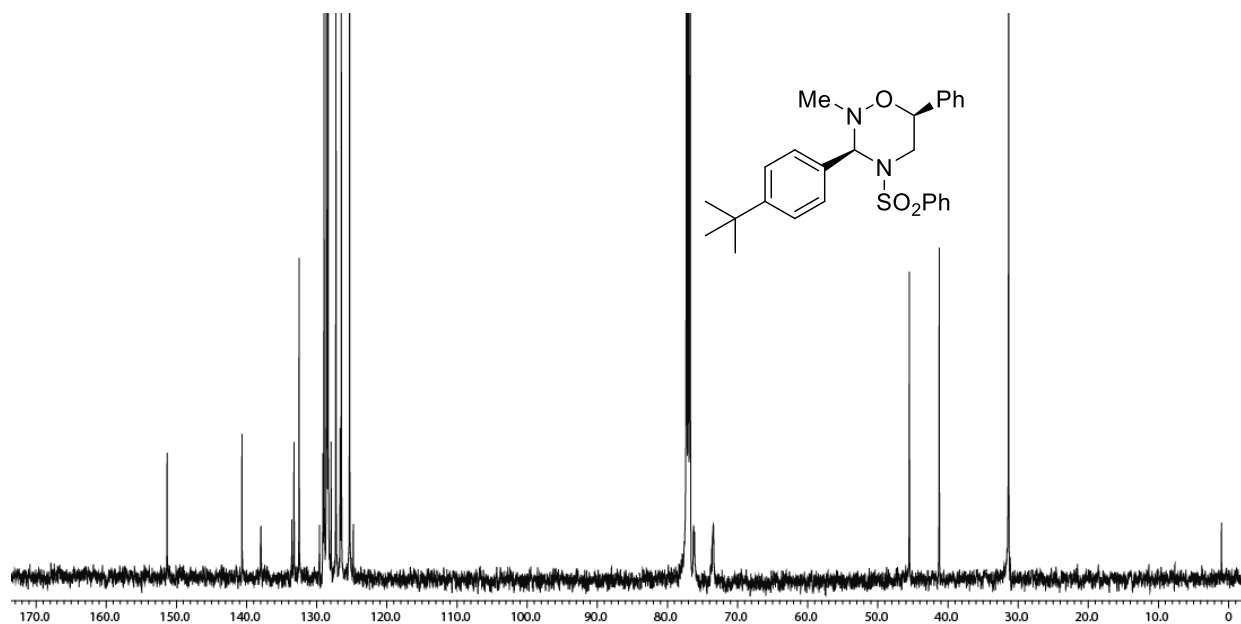

Figure 45.  $^{13}\text{C}$  NMR spectrum of **3s** at 55 °C ( $\text{CDCl}_3$ , 125 MHz)

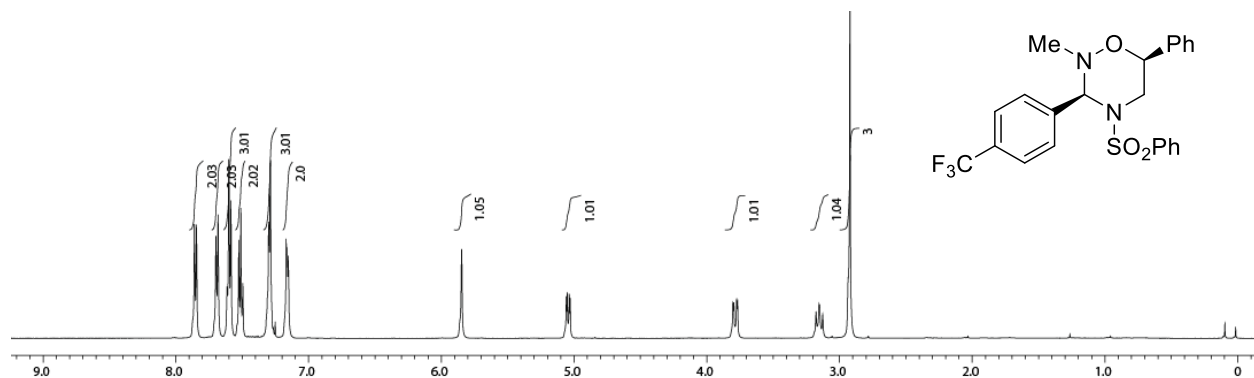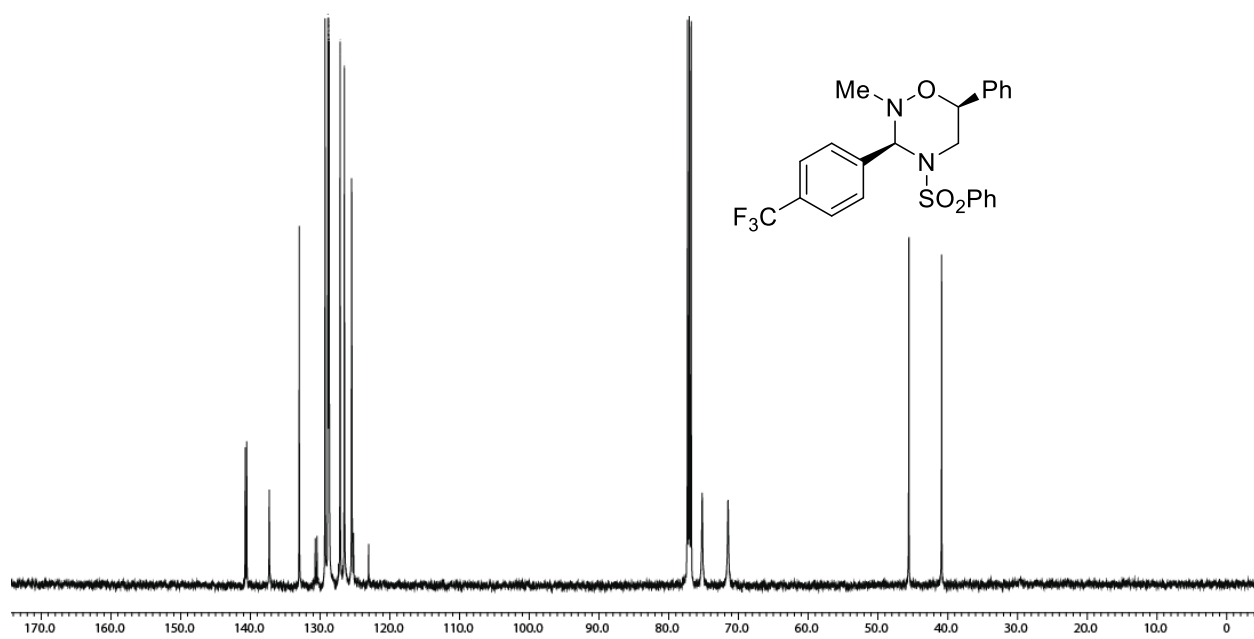

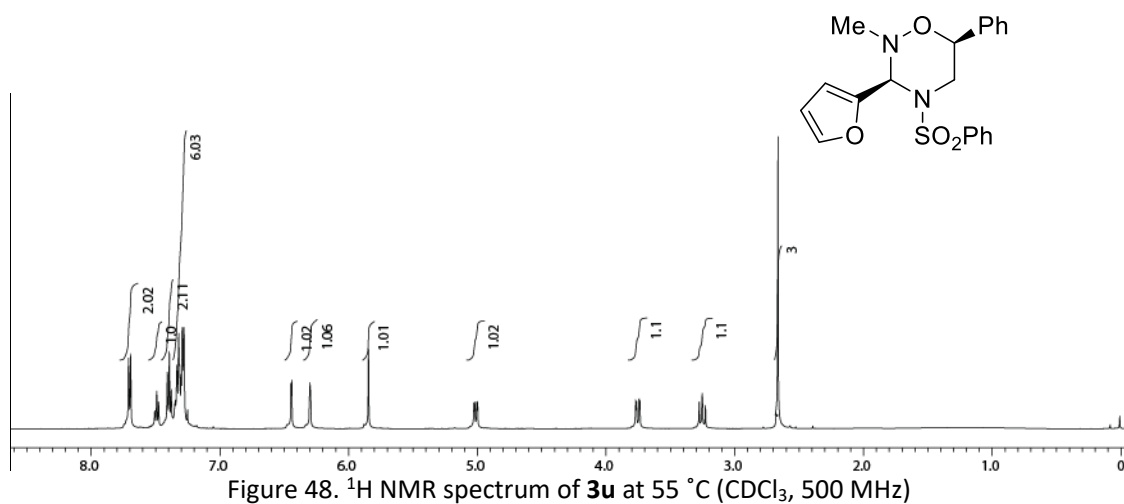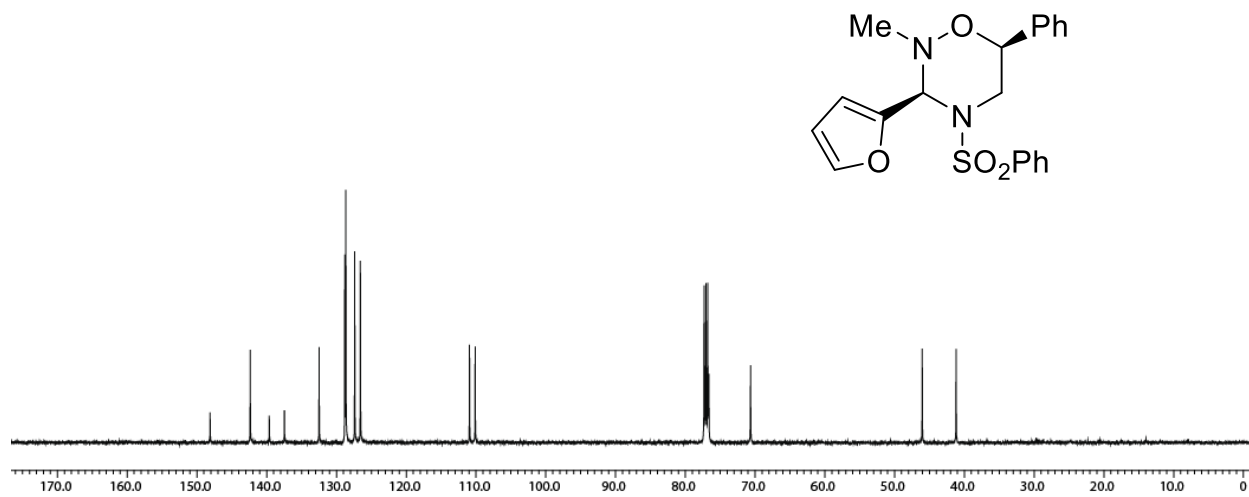

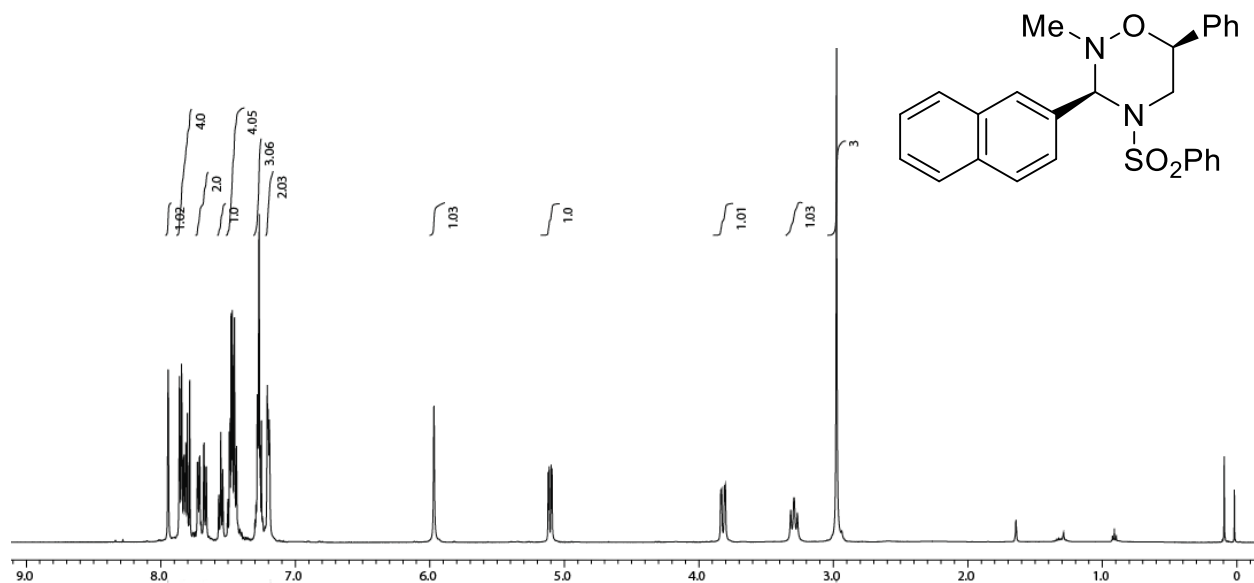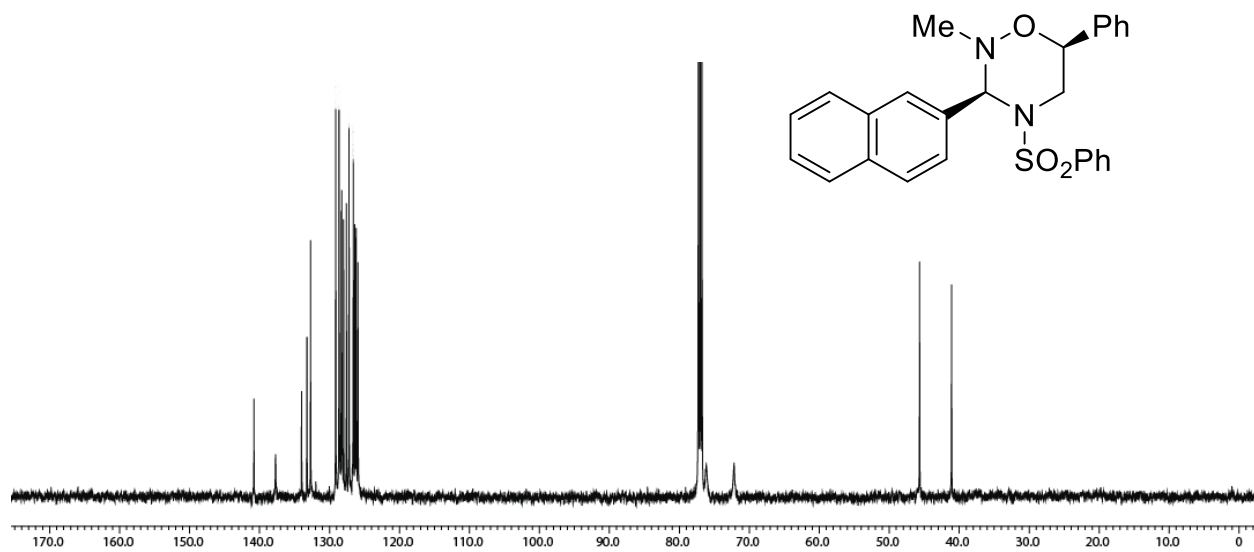

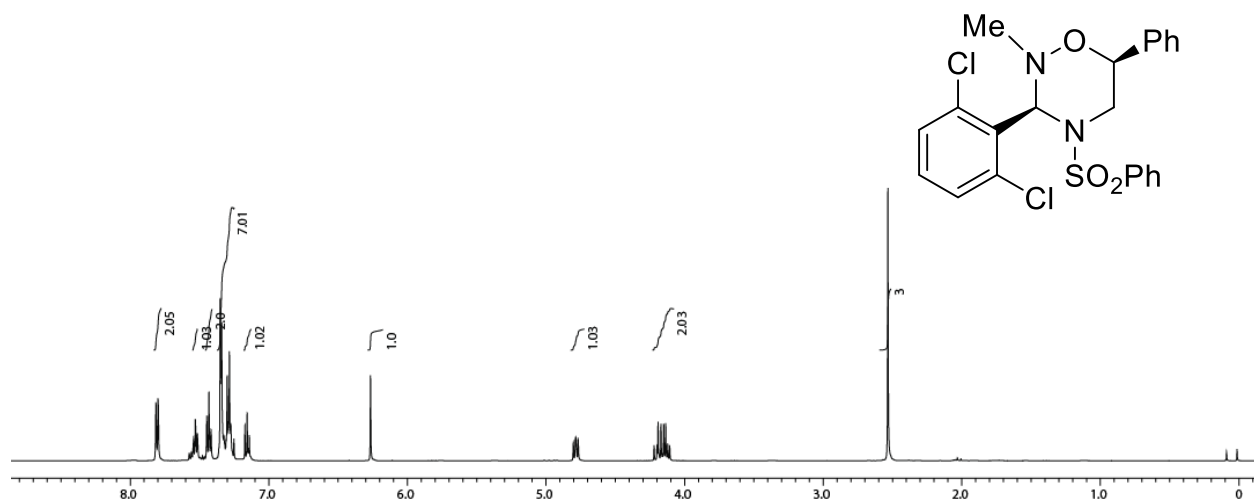

Figure 52. <sup>1</sup>H NMR spectrum of **3w** at 55 °C (CDCl<sub>3</sub>, 500 MHz)

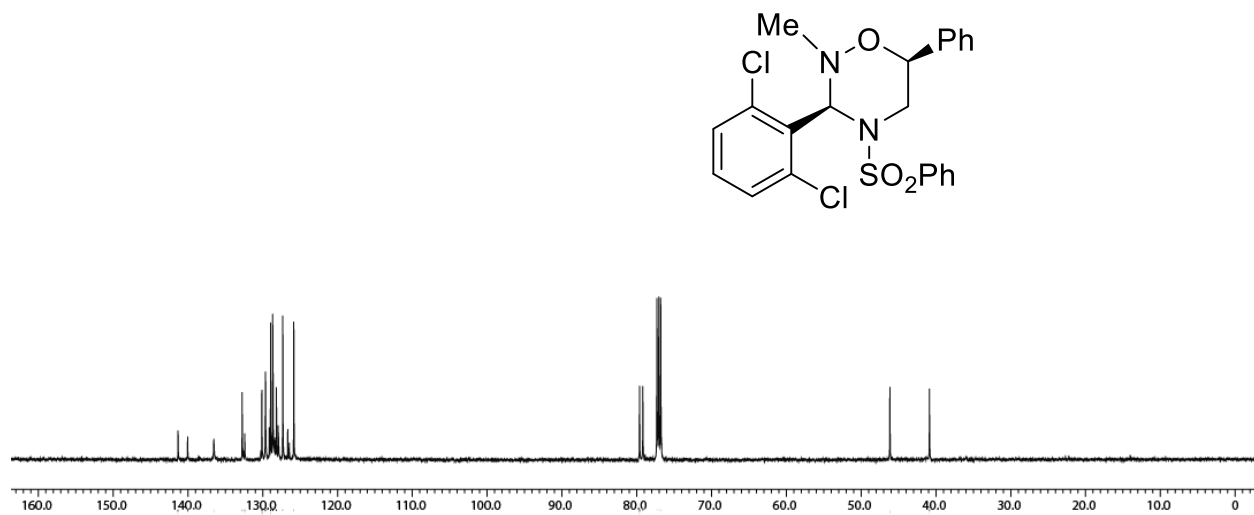

Figure 53. <sup>13</sup>C NMR spectrum of **3w** at 55 °C (CDCl<sub>3</sub>, 125 MHz)

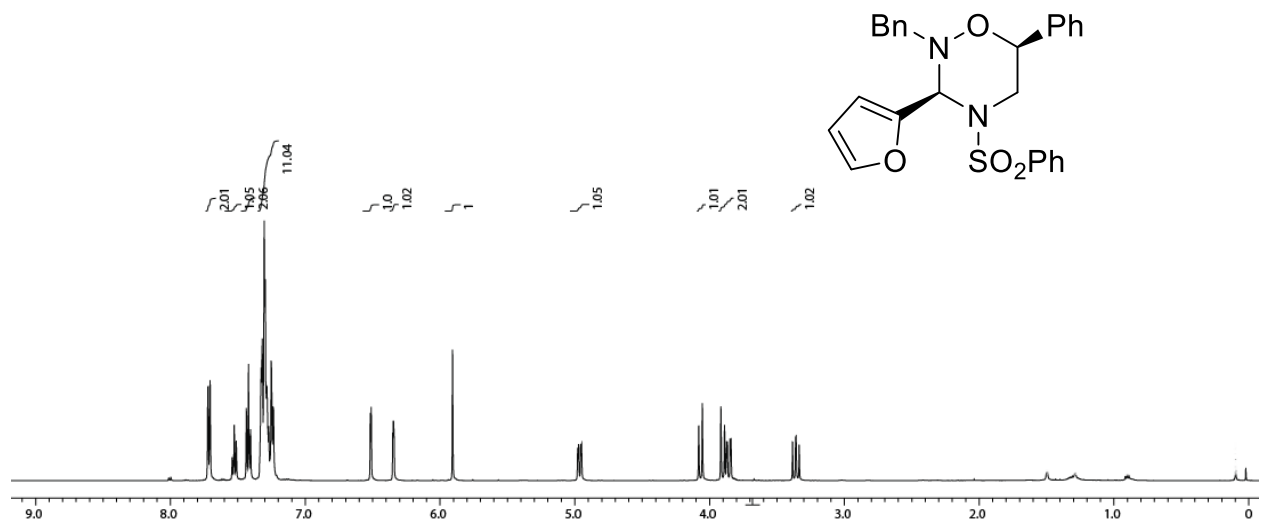

Figure 54.  $^1\text{H}$  NMR spectrum of **3x** at 55 °C ( $\text{CDCl}_3$ , 500 MHz)

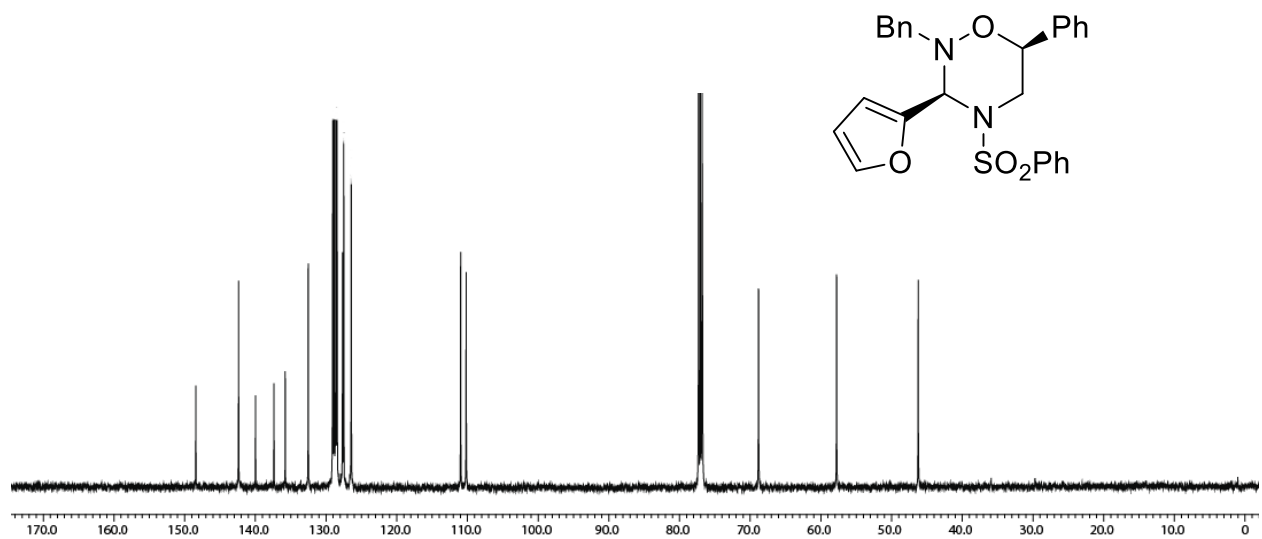

Figure 55.  $^{13}\text{C}$  NMR spectrum of **3x** at 55 °C ( $\text{CDCl}_3$ , 125 MHz)



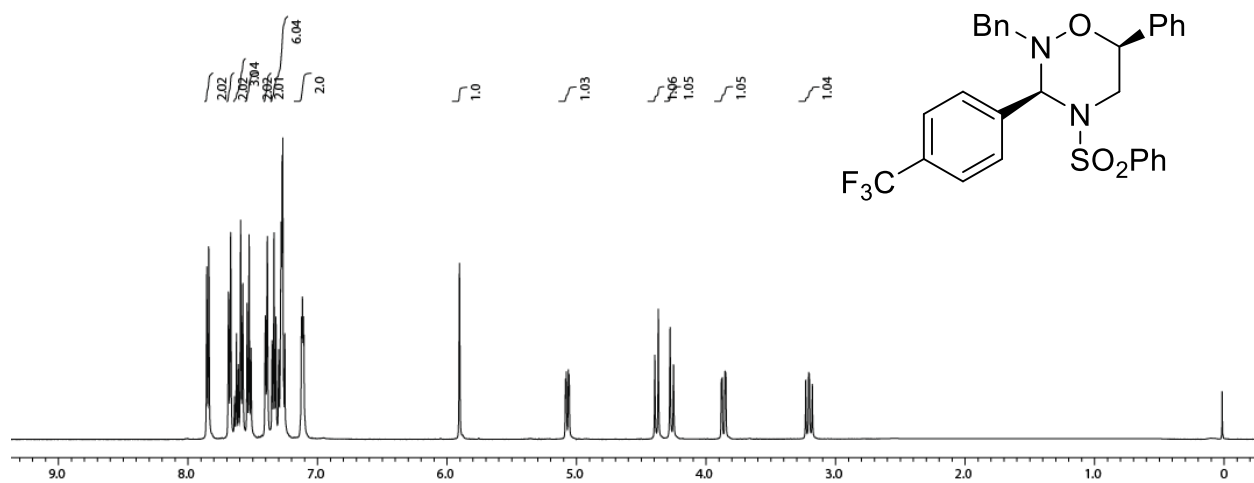

Figure 56. <sup>1</sup>H NMR spectrum of **3y** at 55 °C (CDCl<sub>3</sub>, 500 MHz)

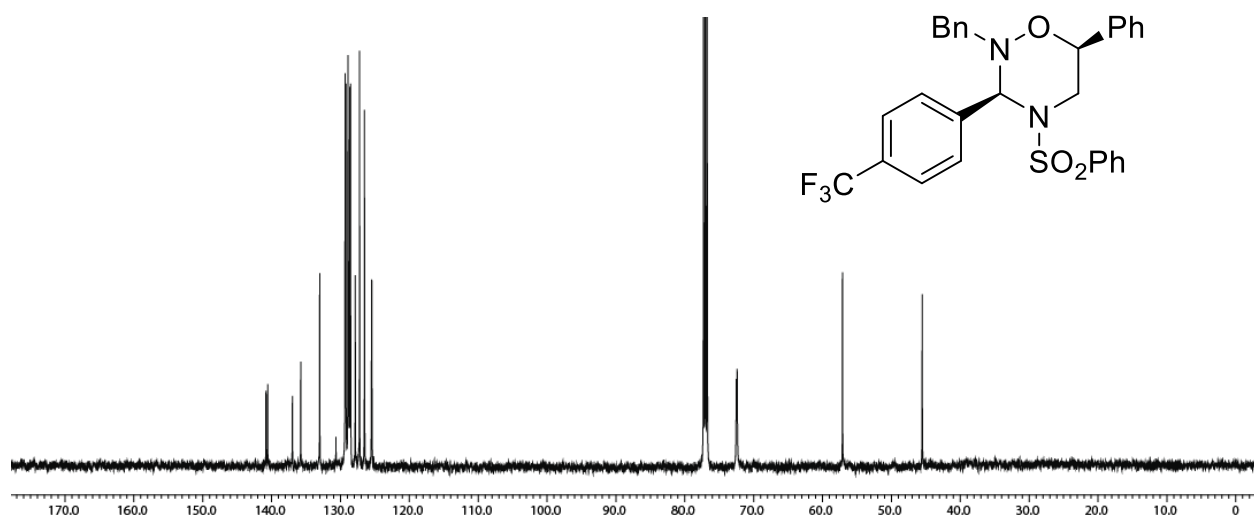

Figure 57. <sup>13</sup>C NMR spectrum of **3y** at 55 °C (CDCl<sub>3</sub>, 125 MHz)

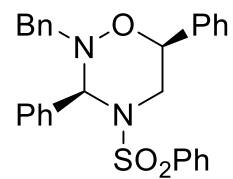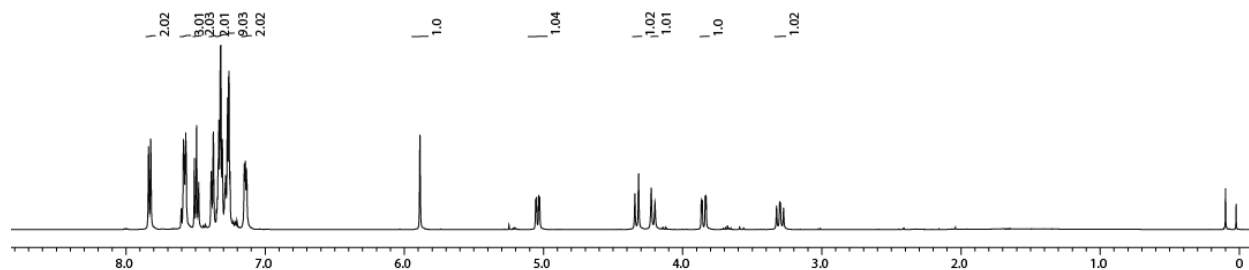

Figure 58.  $^1\text{H}$  NMR spectrum of **3z** at 55 °C ( $\text{CDCl}_3$ , 500 MHz)

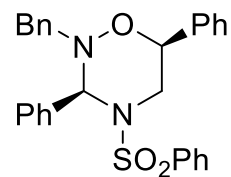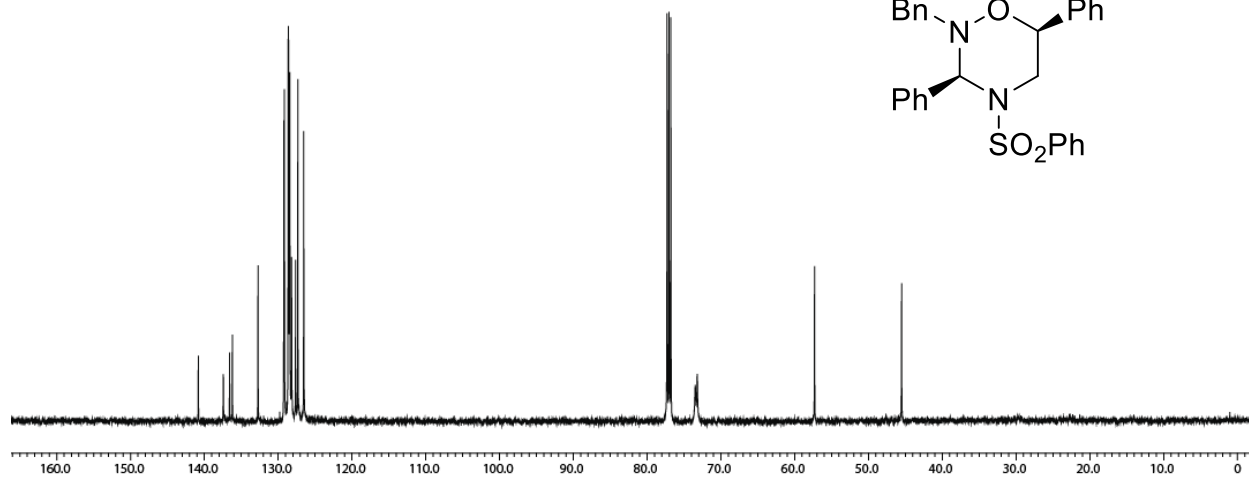

Figure 59.  $^{13}\text{C}$  NMR spectrum of **3z** at 55 °C ( $\text{CDCl}_3$ , 125 MHz)

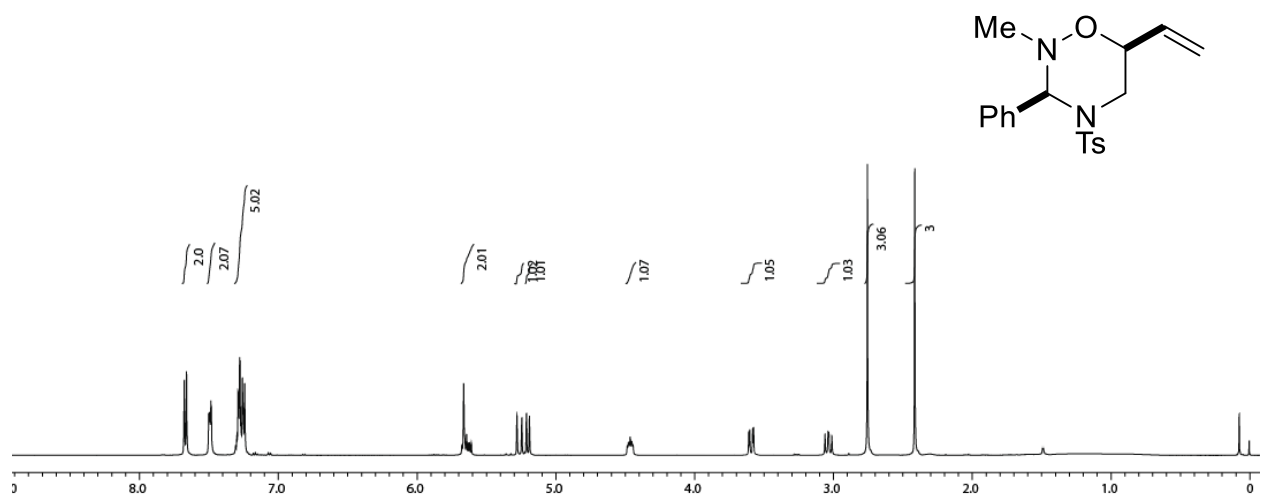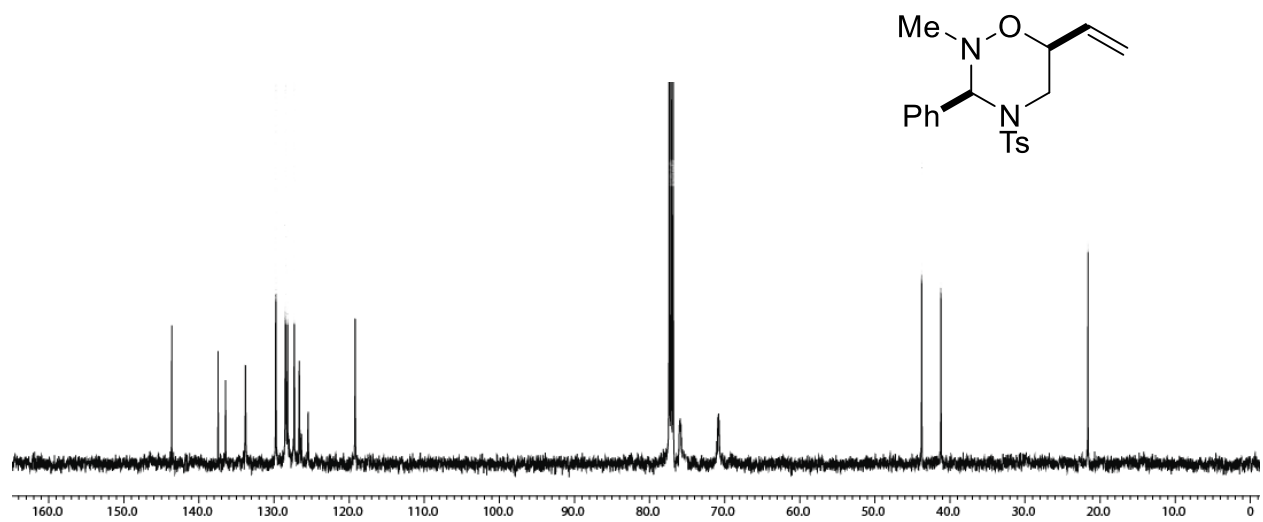

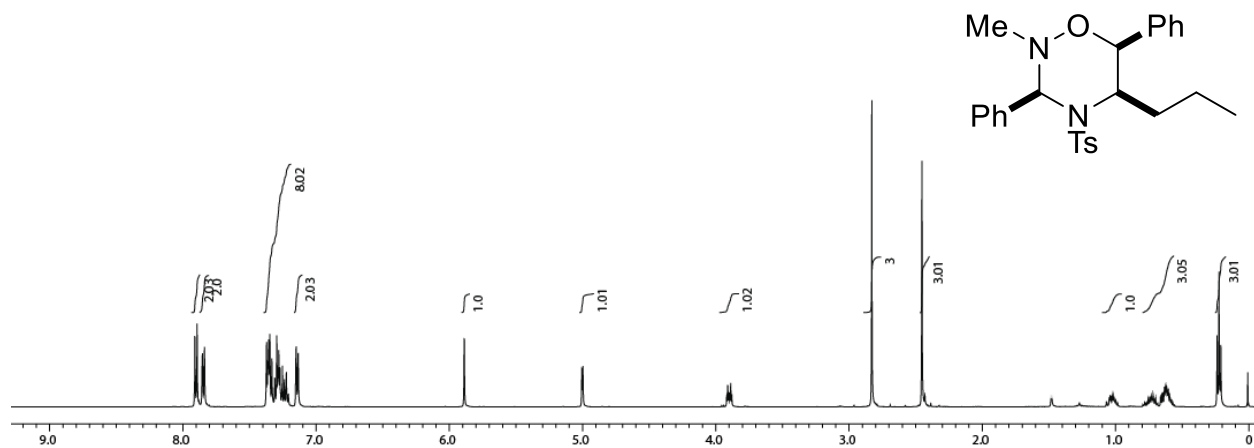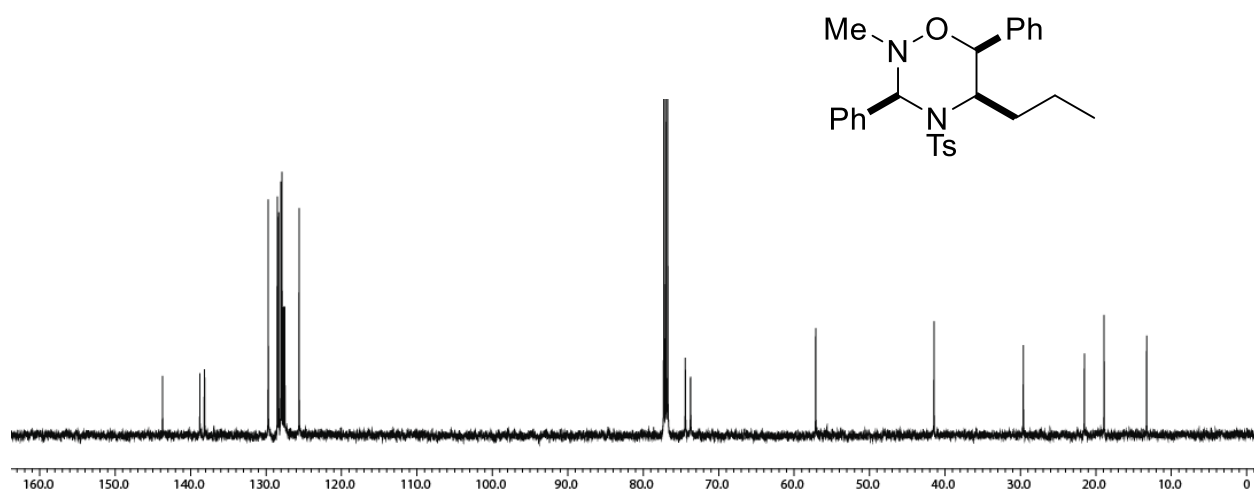

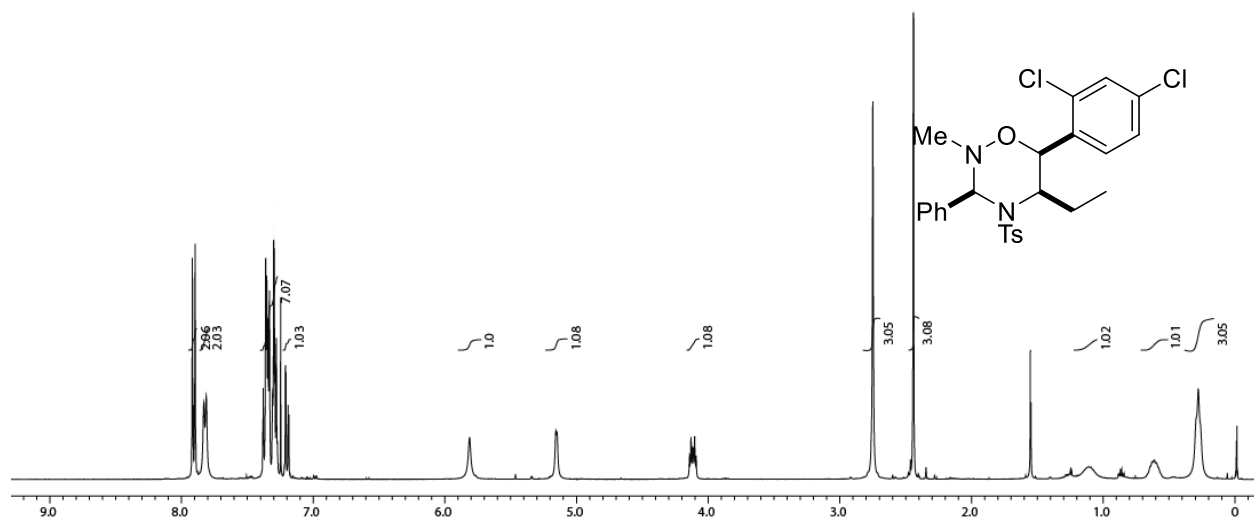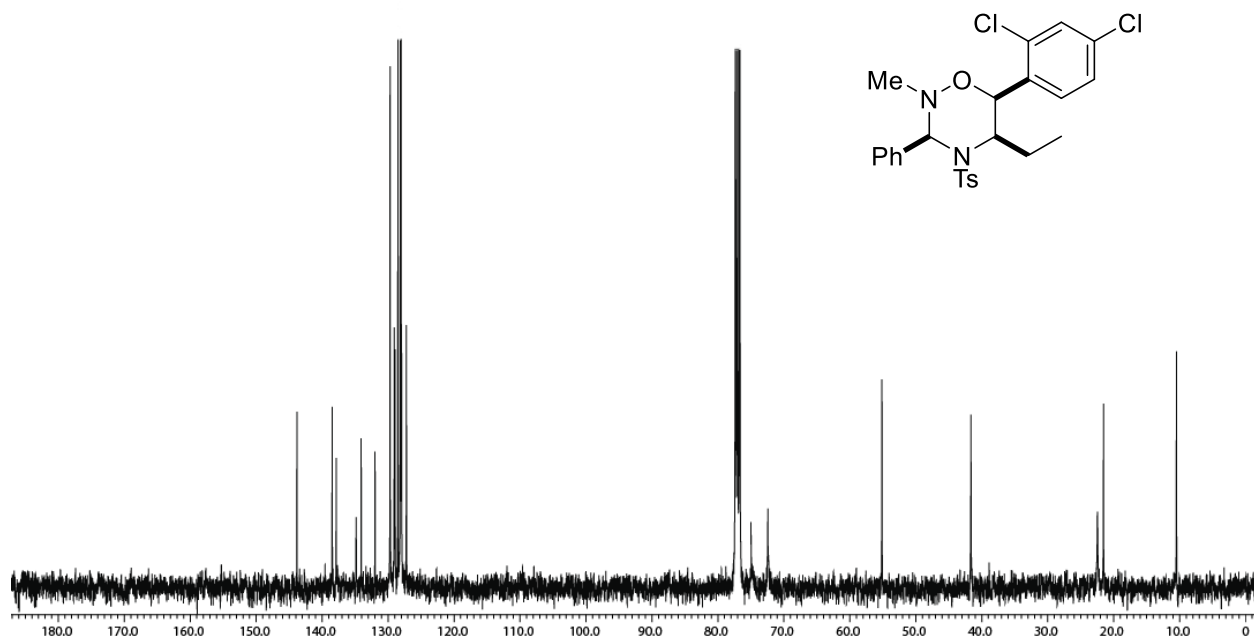

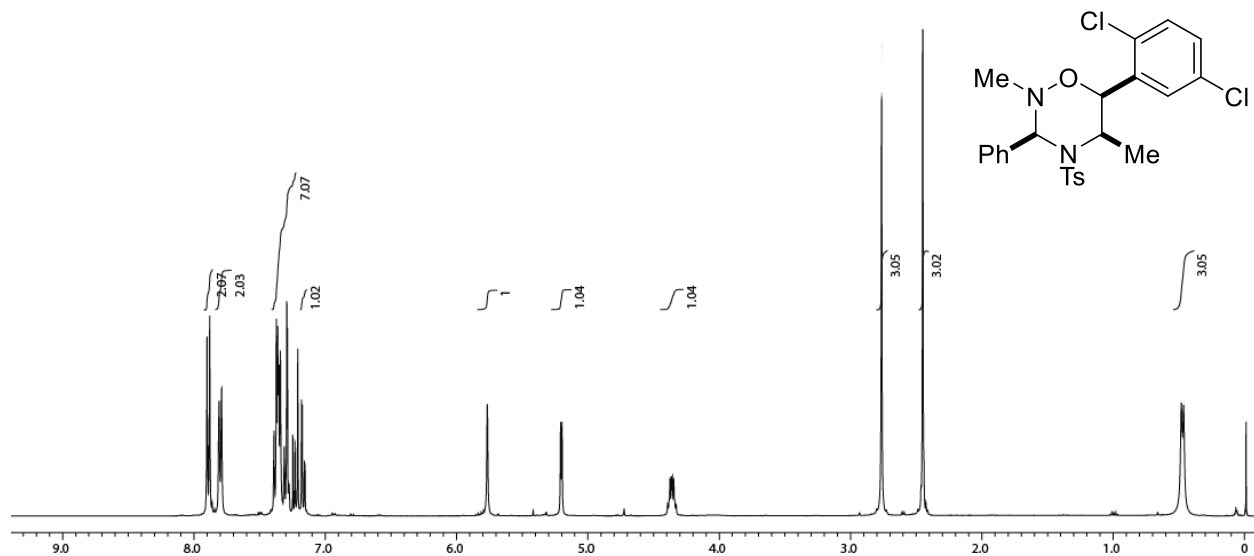

Figure 66.  $^1\text{H}$  NMR spectrum of **6c** at 55 °C ( $\text{CDCl}_3$ , 500 MHz)

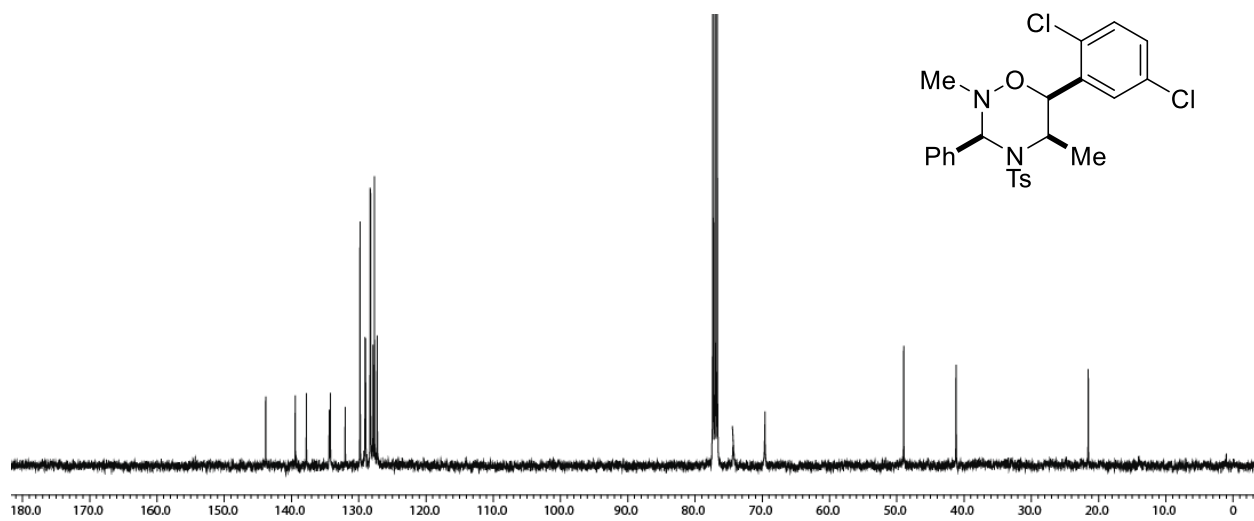

Figure 67.  $^{13}\text{C}$  NMR spectrum of **6c** at 55 °C ( $\text{CDCl}_3$ , 125 MHz)

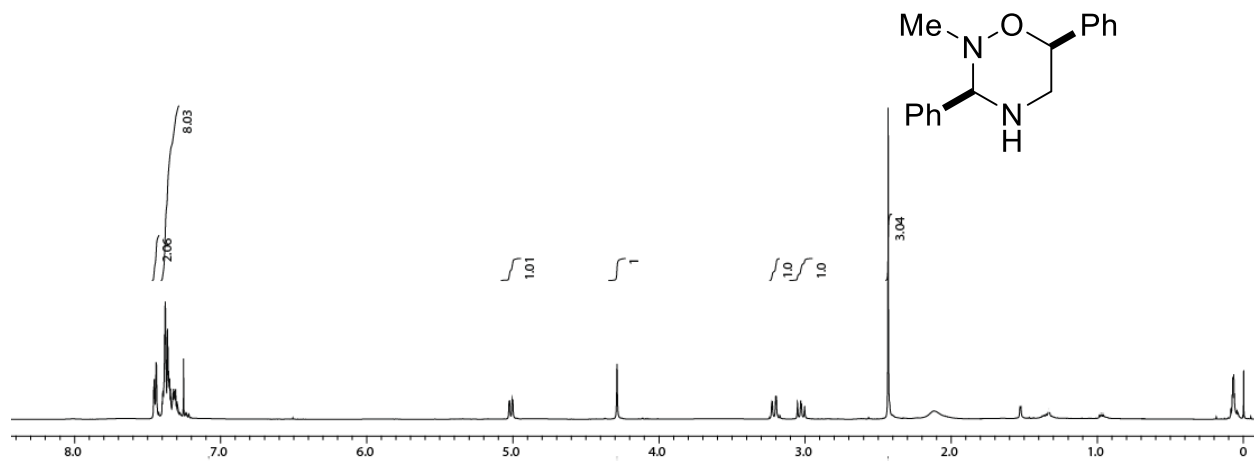

Figure 68.  $^1\text{H}$  NMR spectrum of **7a** at 55 °C ( $\text{CDCl}_3$ , 500 MHz)

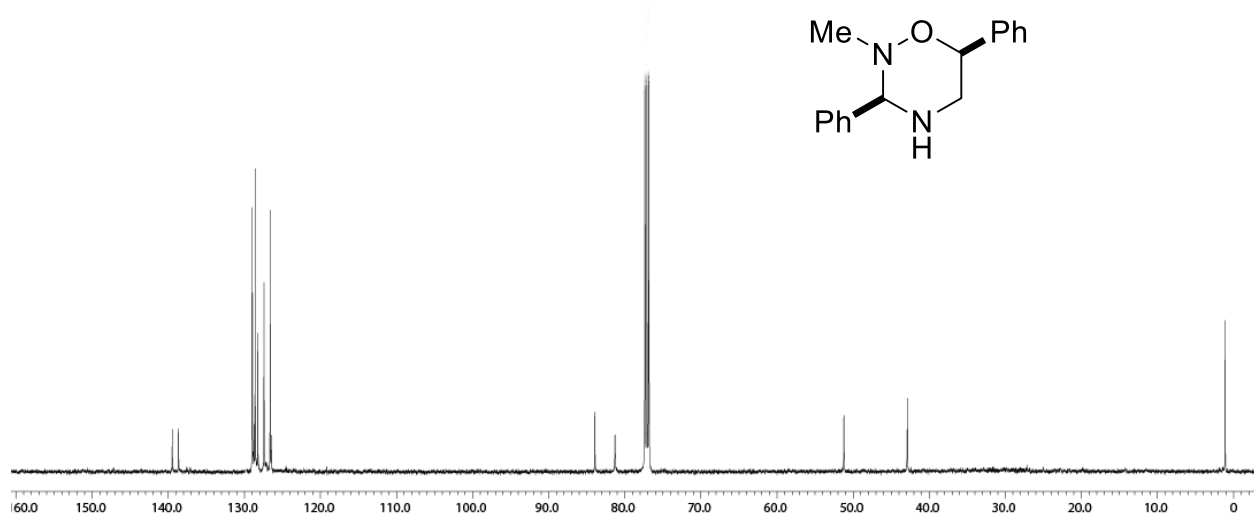

Figure 69.  $^{13}\text{C}$  NMR spectrum of **7a** at 55 °C ( $\text{CDCl}_3$ , 125 MHz)

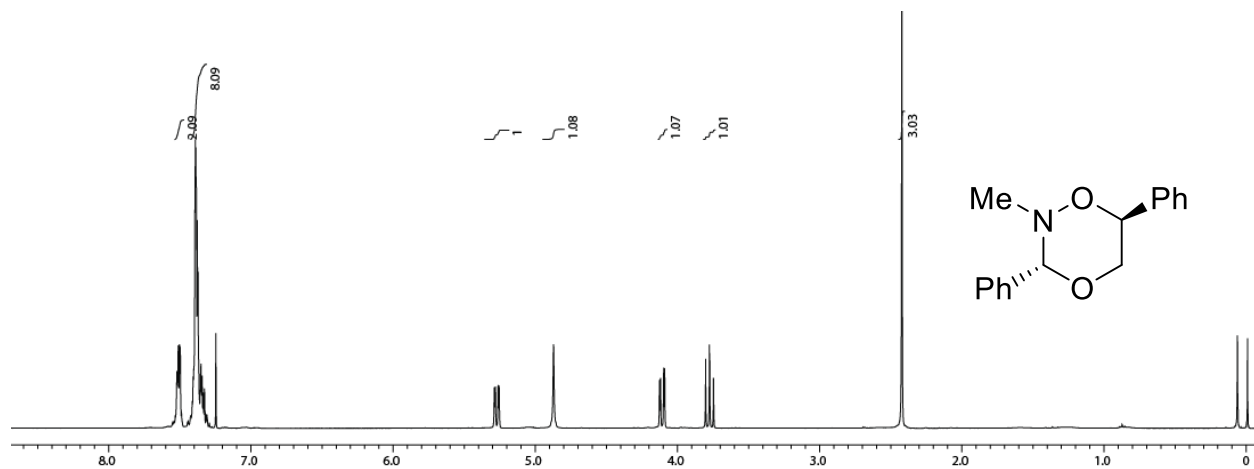

Figure 70.  $^1\text{H}$  NMR spectrum of **9a** at 55 °C ( $\text{CDCl}_3$ , 500 MHz)

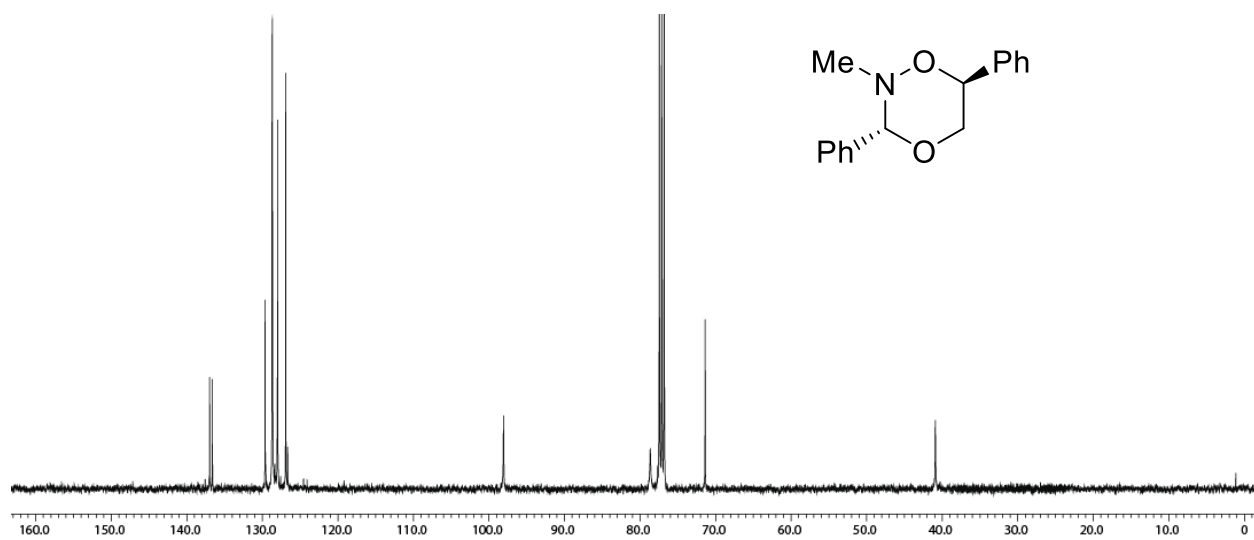

Figure 71.  $^{13}\text{C}$  NMR spectrum of **9a** at 55 °C ( $\text{CDCl}_3$ , 125 MHz)



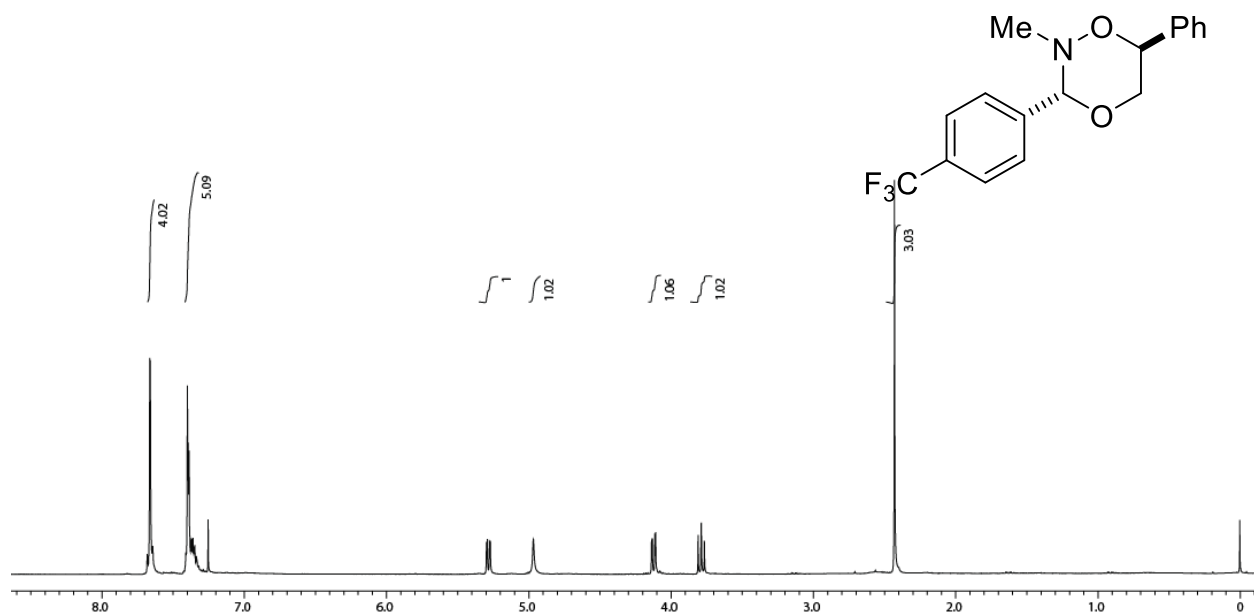

Figure 72.  $^1\text{H}$  NMR spectrum of **9b** at 55 °C ( $\text{CDCl}_3$ , 500 MHz)

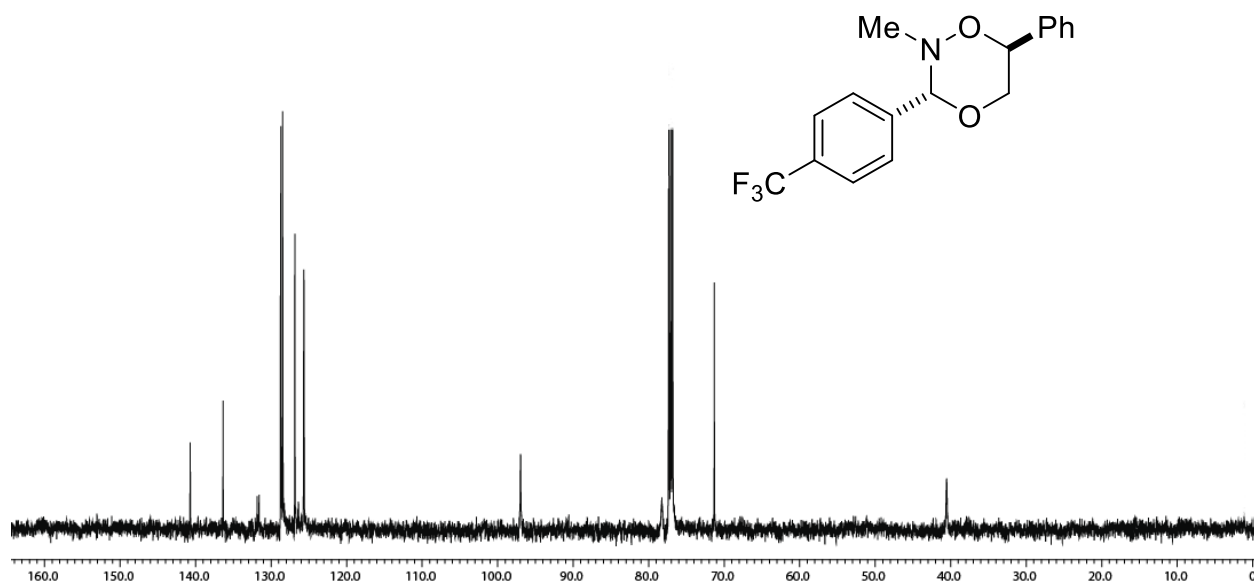

Figure 73.  $^{13}\text{C}$  NMR spectrum of **9b** at 55 °C ( $\text{CDCl}_3$ , 125 MHz)

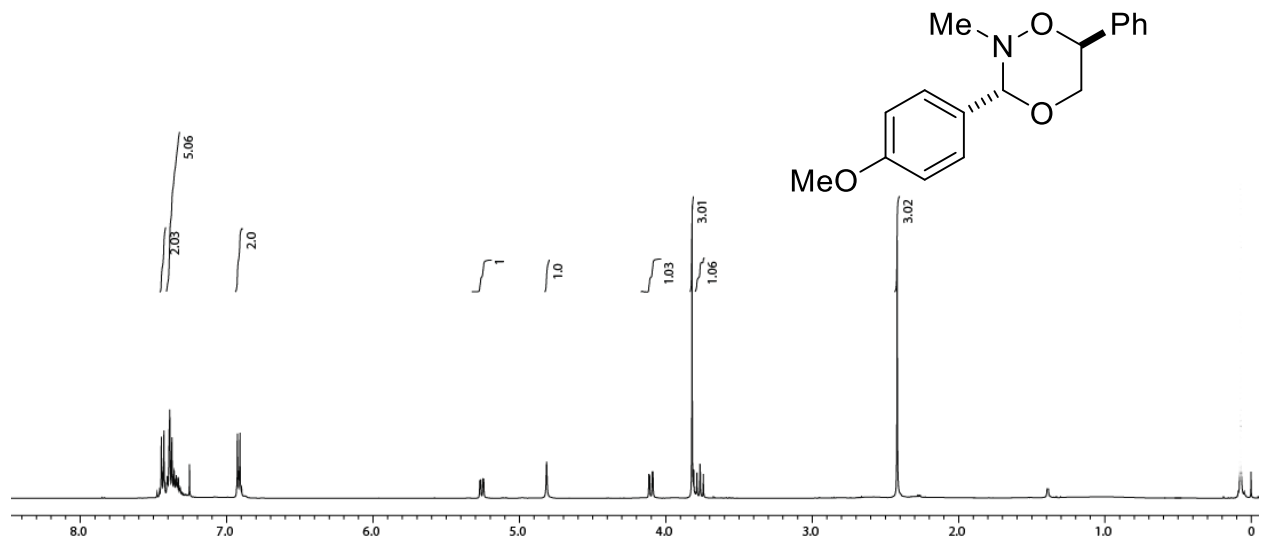

Figure 74. <sup>1</sup>H NMR spectrum of **9c** at 55 °C (CDCl<sub>3</sub>, 500 MHz)

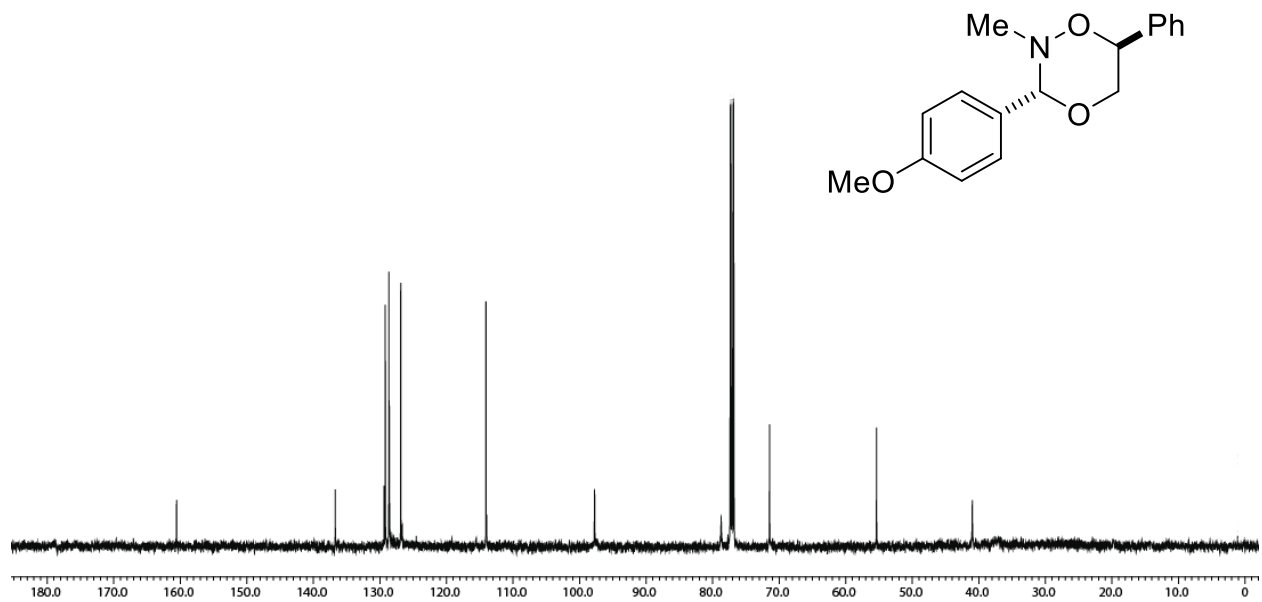

Figure 75. <sup>13</sup>C NMR spectrum of **9c** at 55 °C (CDCl<sub>3</sub>, 125 MHz)

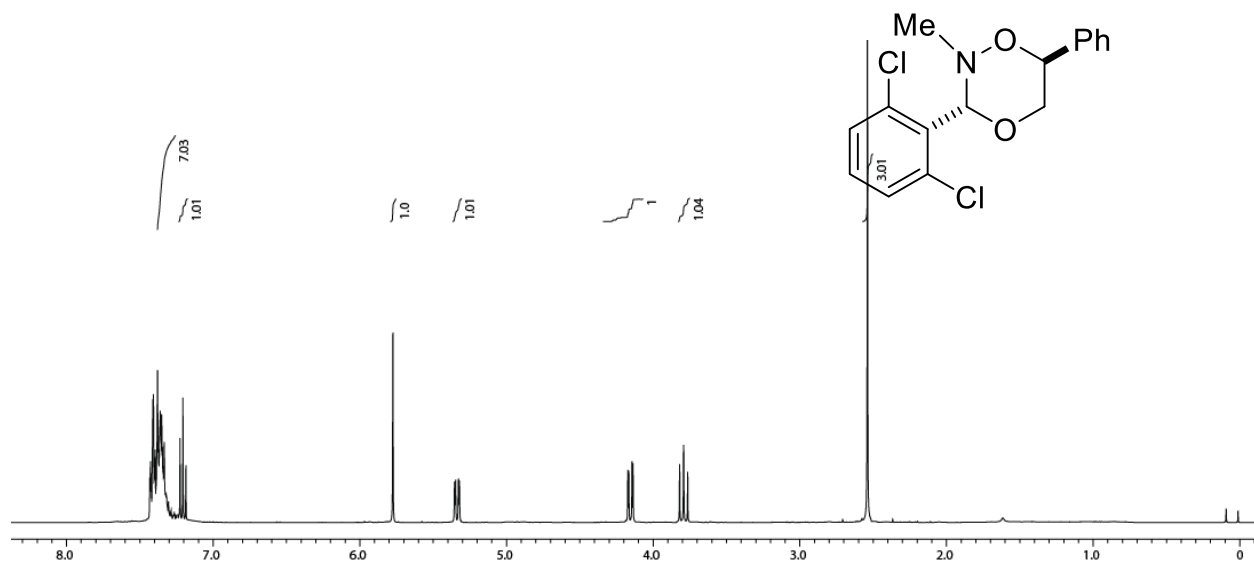

Figure 76.  $^1\text{H}$  NMR spectrum of **9d** at 55 °C ( $\text{CDCl}_3$ , 500 MHz)

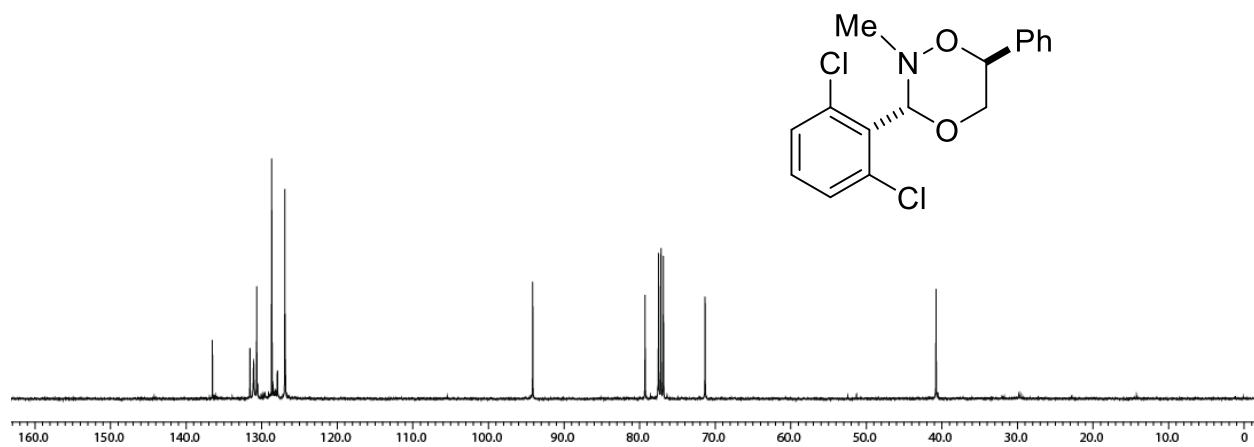

Figure 77.  $^{13}\text{C}$  NMR spectrum of **9d** at 55 °C ( $\text{CDCl}_3$ , 125 MHz)

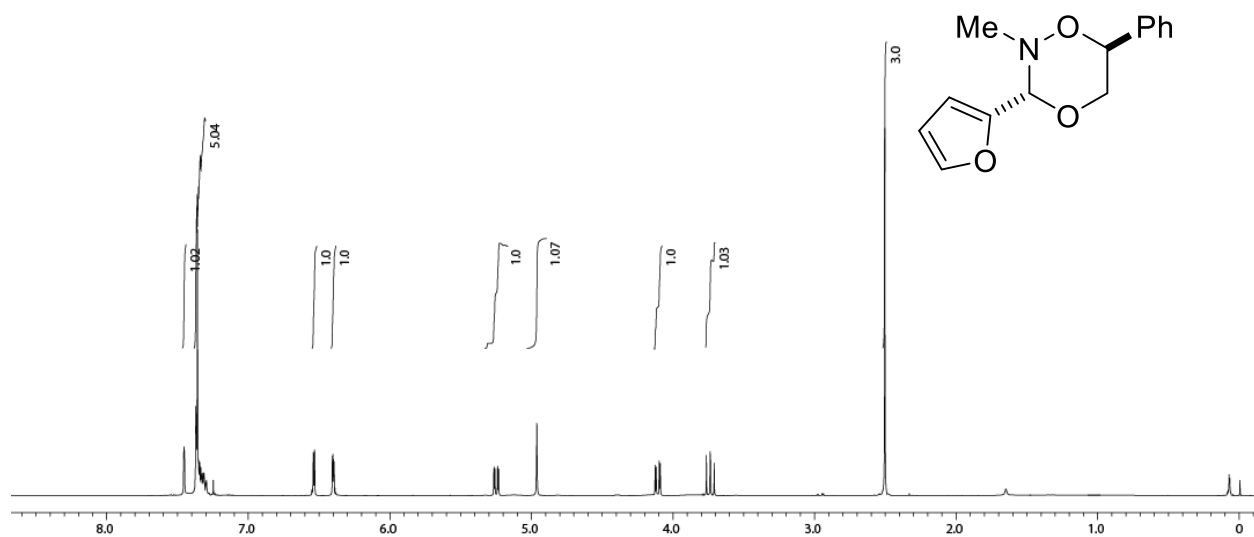

Figure 78.  $^1\text{H}$  NMR spectrum of **9e** at 55 °C ( $\text{CDCl}_3$ , 500 MHz)

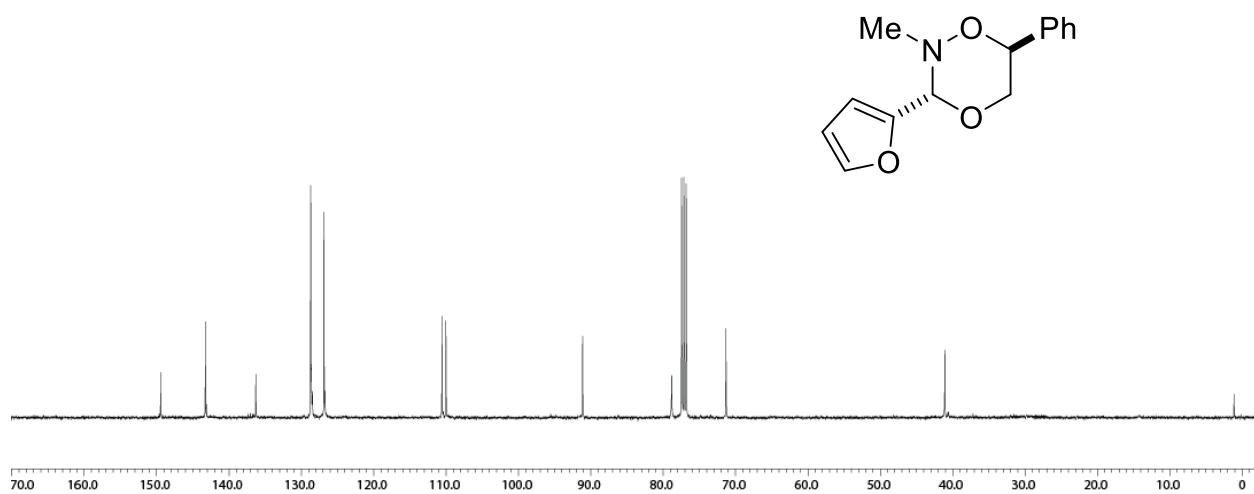

Figure 79.  $^{13}\text{C}$  NMR spectrum of **9e** at 55 °C ( $\text{CDCl}_3$ , 125 MHz)

## 7. HPLC chromatograms:

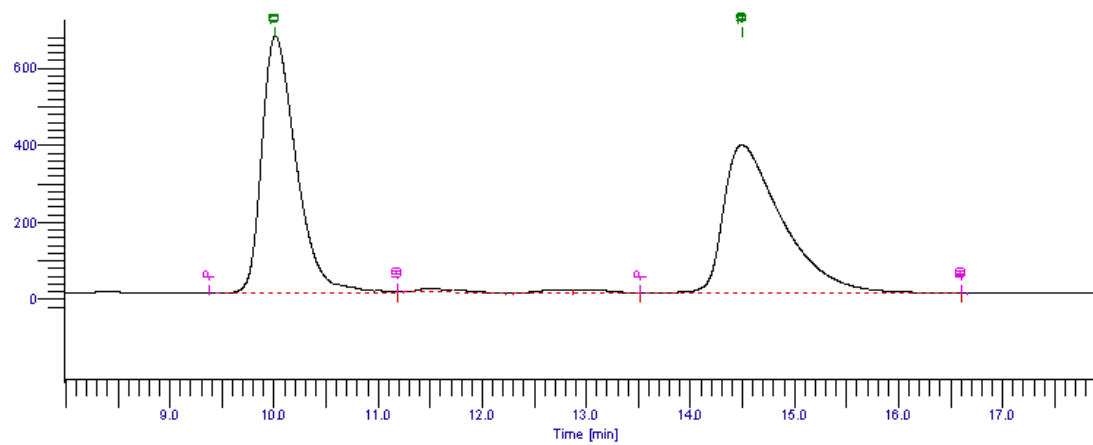

**Figure 80.** HPLC chromatogram of racemic compound **3m** (OD-H column; 95:5 Hexane–Isopropanol; 1 mL min<sup>-1</sup>)

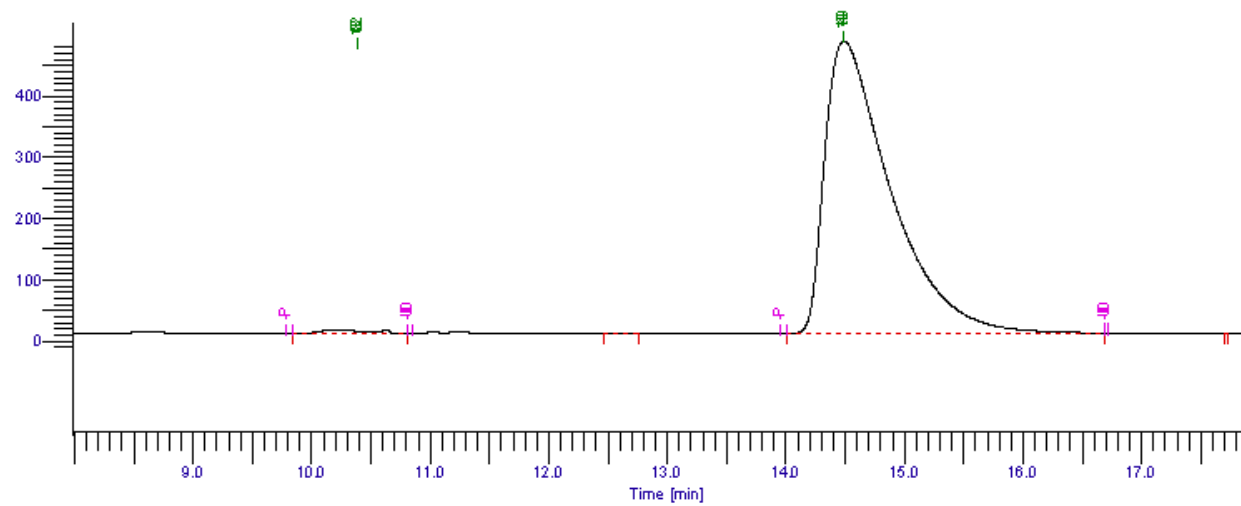

**Figure 81.** HPLC chromatogram of chiral compound **3m** (OD-H column; 95:5 Hexane–Isopropanol; 1 mL min<sup>-1</sup>) (ee 99%)

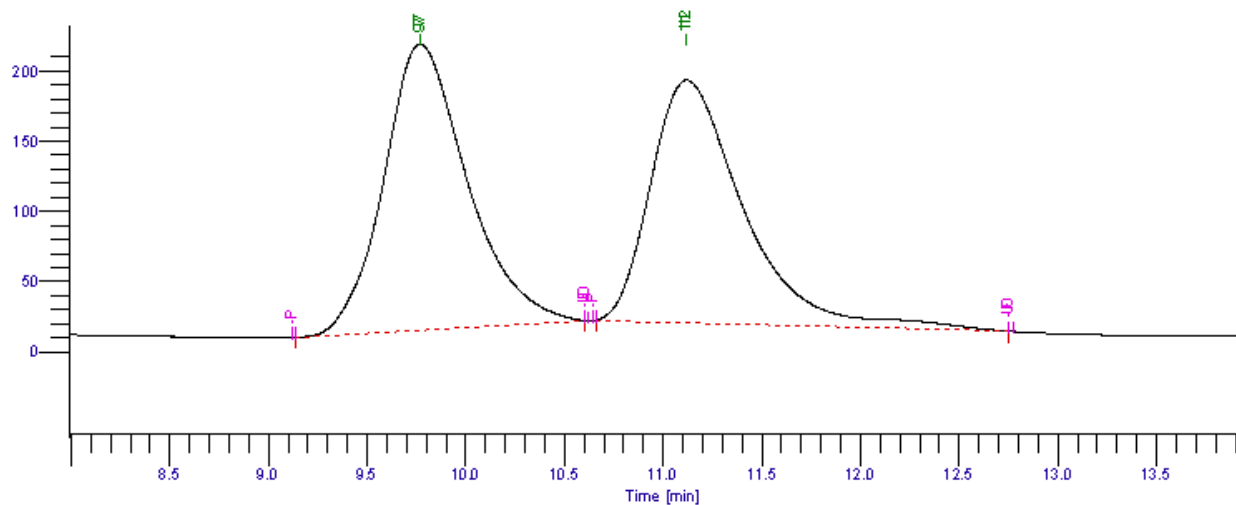

**Figure 82.** HPLC chromatogram of racemic compound **3q** (Cellulose 2 column; 80:20 Hexane–Isopropanol; 1 mL min<sup>-1</sup>)

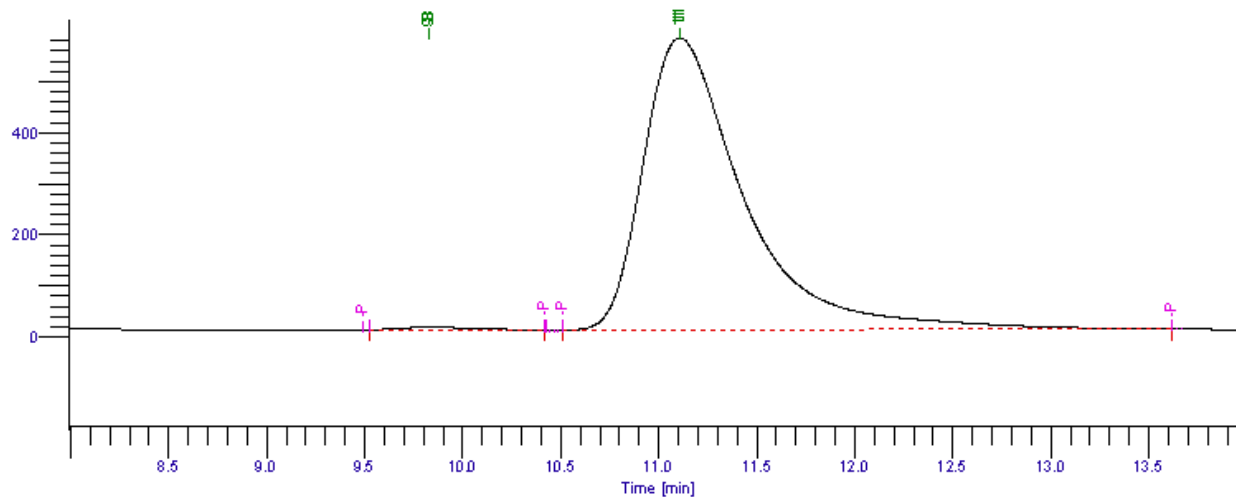

**Figure 83.** HPLC chromatogram of chiral compound **3q** (Cellulose 2 column; 80:20 Hexane–Isopropanol; 1 mL min<sup>-1</sup>) (ee >99%)

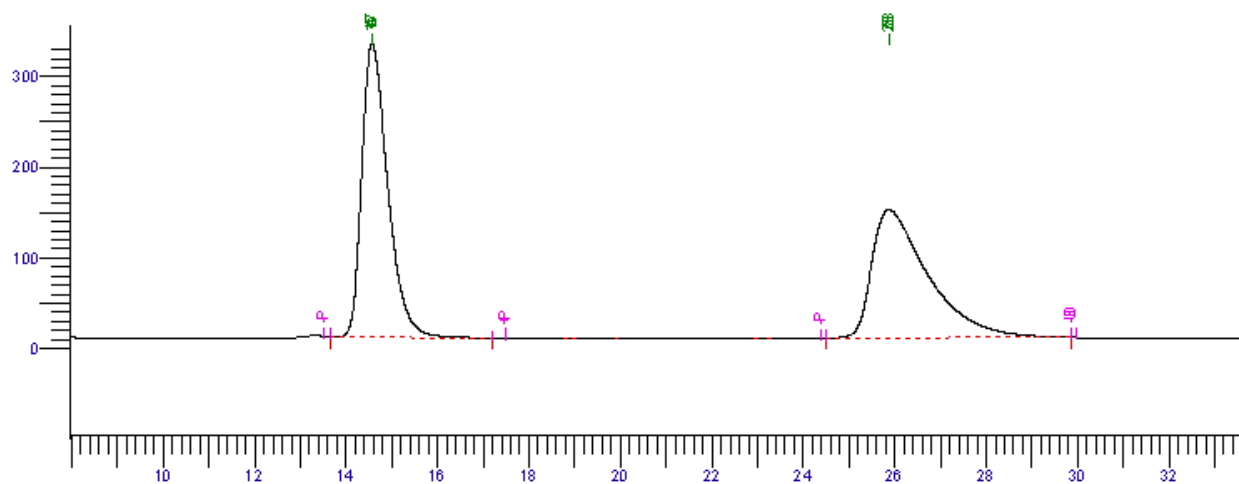

**Figure 84.** HPLC chromatogram of racemic compound **3r** (OD-H column; 95:5 Hexane–Isopropanol; 1 mL min<sup>-1</sup>)

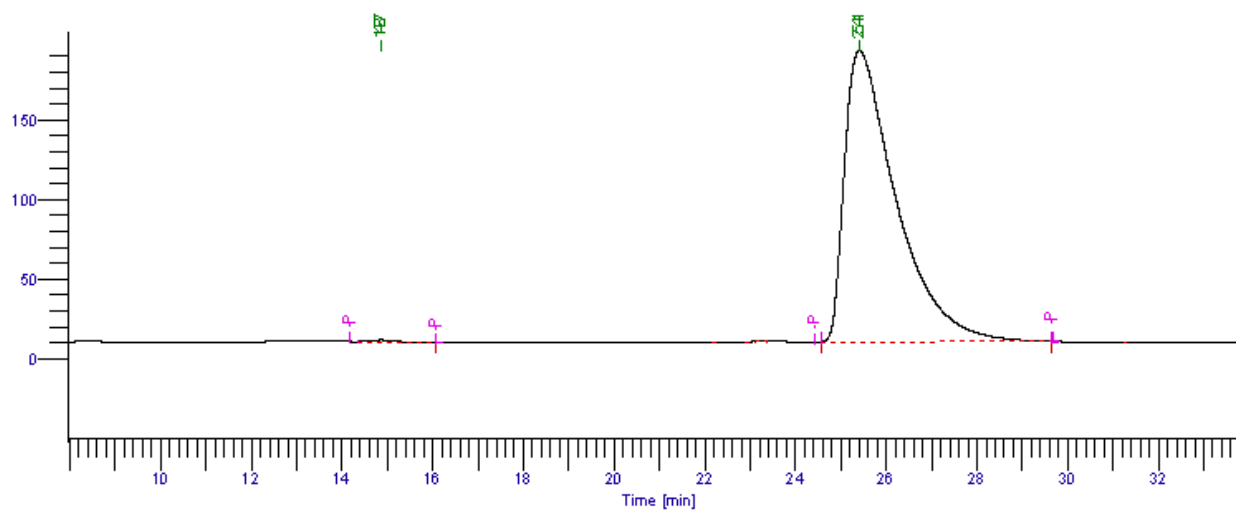

**Figure 85.** HPLC chromatogram of chiral compound **3r** (OD-H column; 95:5 Hexane–Isopropanol; 1 mL min<sup>-1</sup>) (ee >99%)

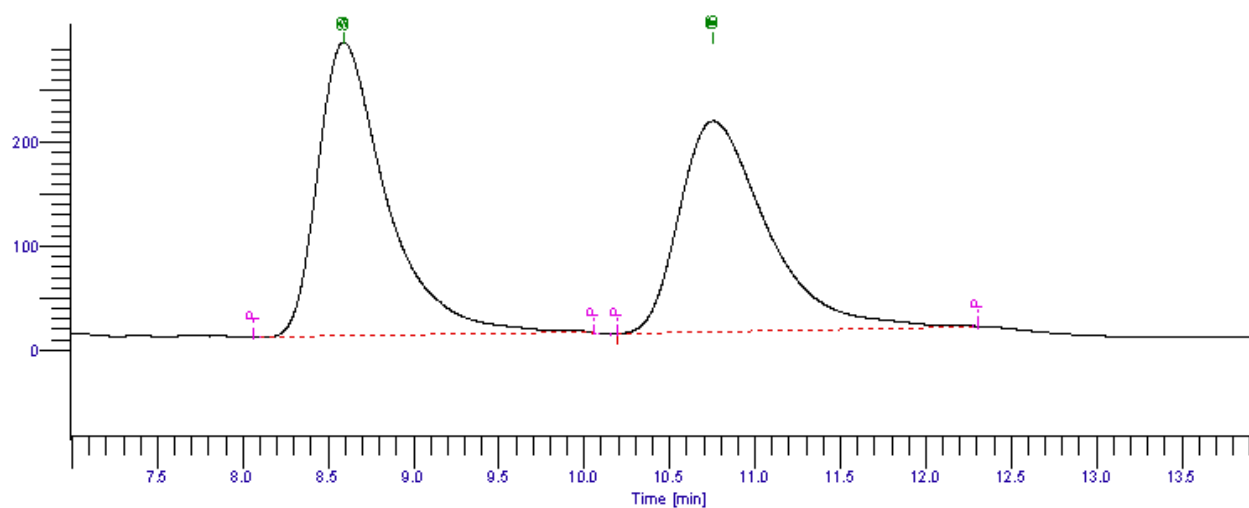

**Figure 86.** HPLC chromatogram of racemic compound **3s** (Cellulose 2 column; 80:20 Hexane–Isopropanol; 1 mL min<sup>-1</sup>)

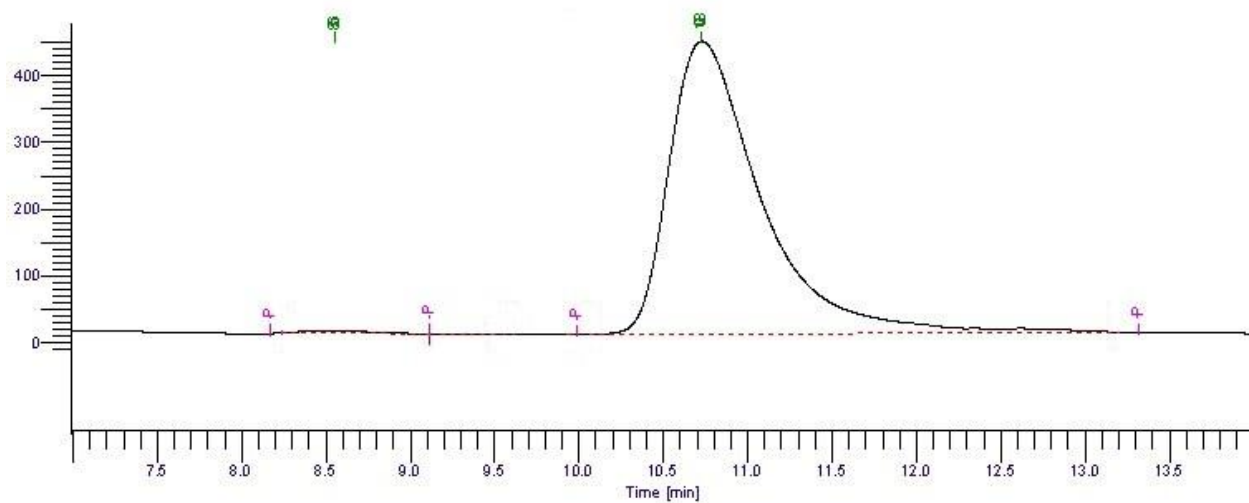

**Figure 87.** HPLC chromatogram of chiral compound **3s** (Cellulose 2 column; 80:20 Hexane–Isopropanol; 1 mL min<sup>-1</sup>) (ee 99%)



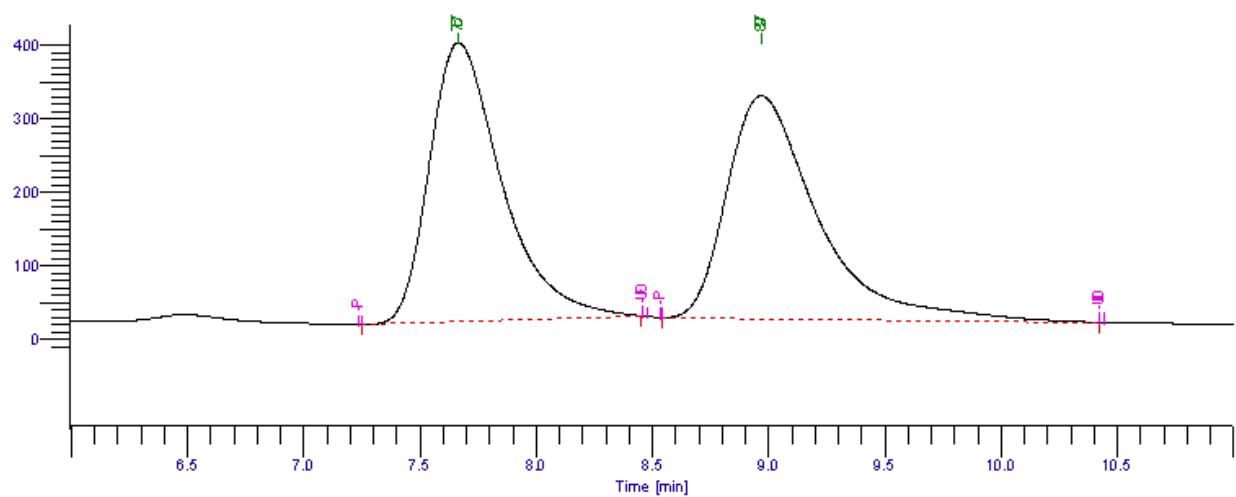

**Figure 88.** HPLC chromatogram of racemic compound **3t** (Cellulose 2 column; 80:20 Hexane–Isopropanol; 1 mL min<sup>-1</sup>)

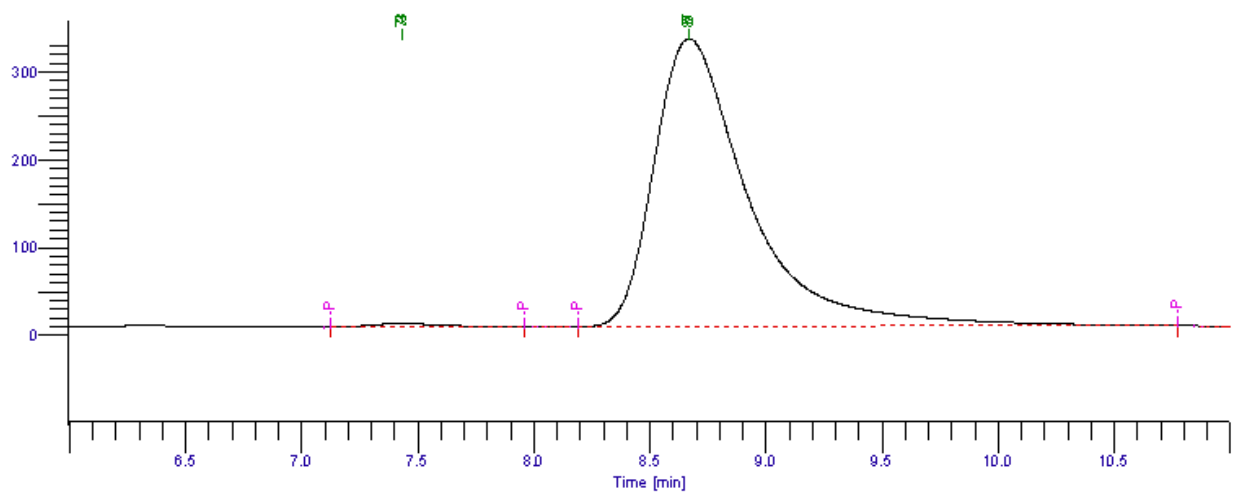

**Figure 89.** HPLC chromatogram of chiral compound **3t** (Cellulose 2 column; 80:20 Hexane–Isopropanol; 1 mL min<sup>-1</sup>) (ee 99%)

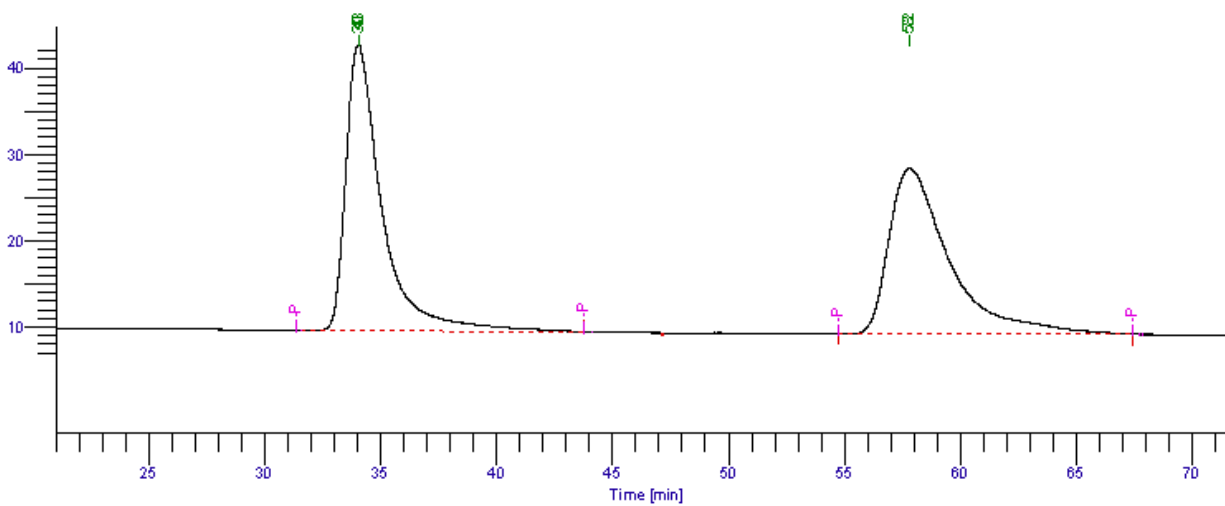

**Figure 90.** HPLC chromatogram of racemic compound **3u** (Cellulose 2 column; 95:5 Hexane–Isopropanol; 1 mL min<sup>-1</sup>)

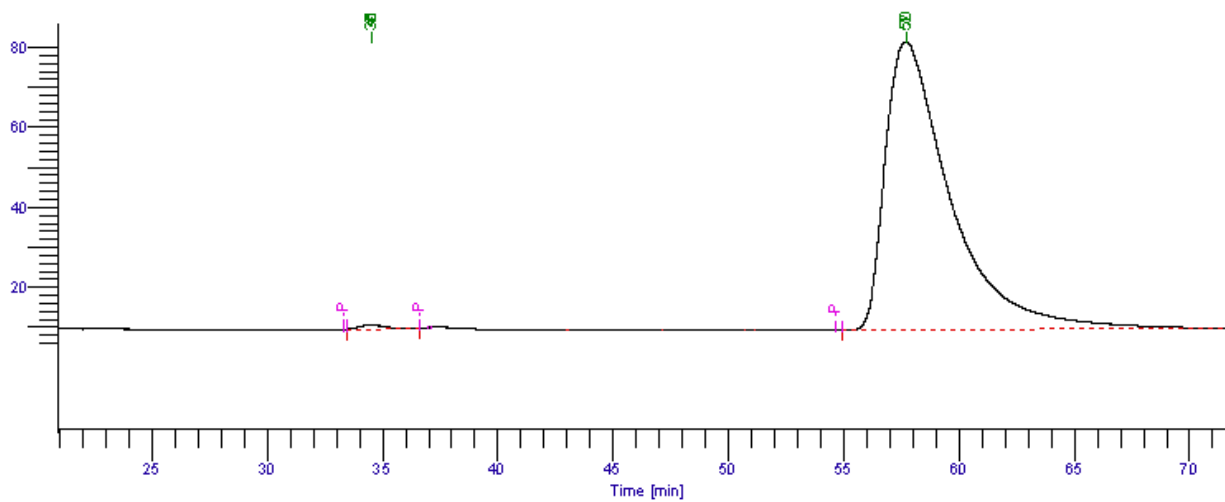

**Figure 91.** HPLC chromatogram of chiral compound **3u** (Cellulose 2 column; 95:5 Hexane–Isopropanol; 1 mL min<sup>-1</sup>) (ee 99%)

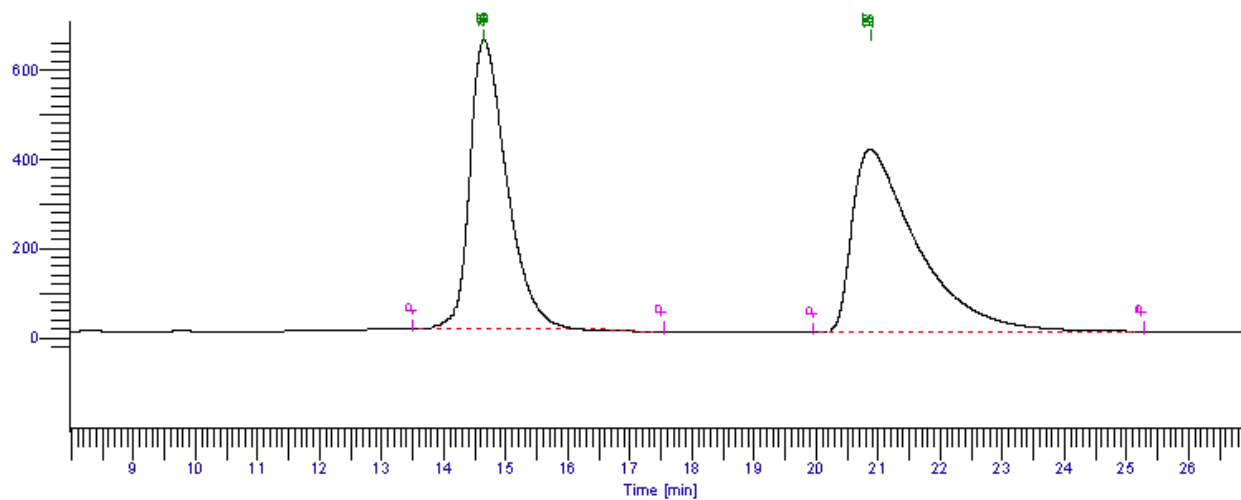

**Figure 92.** HPLC chromatogram of racemic compound **3v** (OD-H column; 95:5 Hexane–Isopropanol; 1 mL min<sup>-1</sup>)

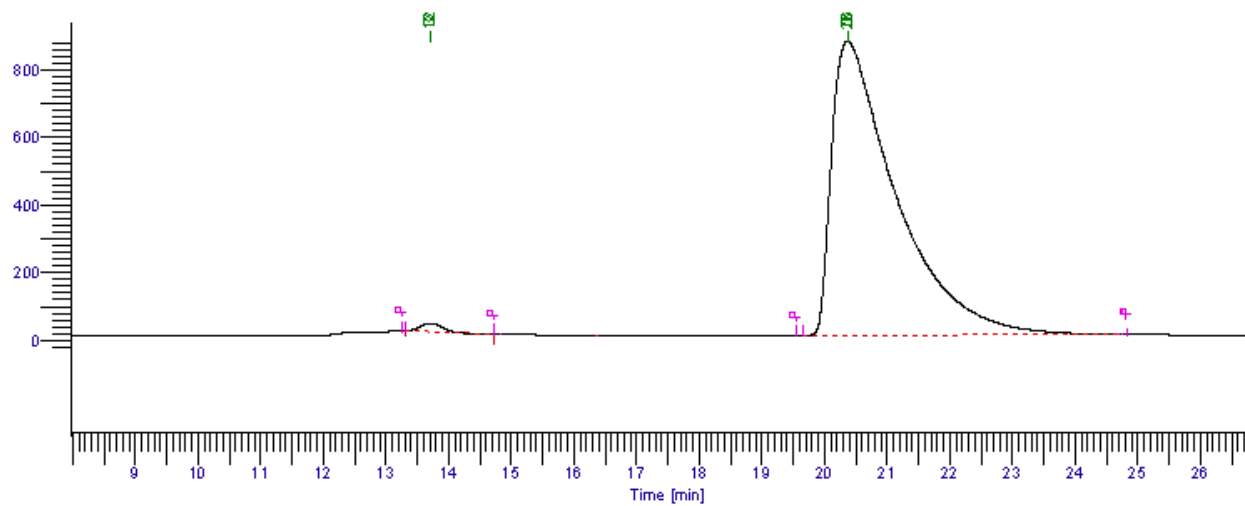

**Figure 93.** HPLC chromatogram of chiral compound **3v** (OD-H column; 95:5 Hexane–Isopropanol; 1 mL min<sup>-1</sup>) (ee 98%)

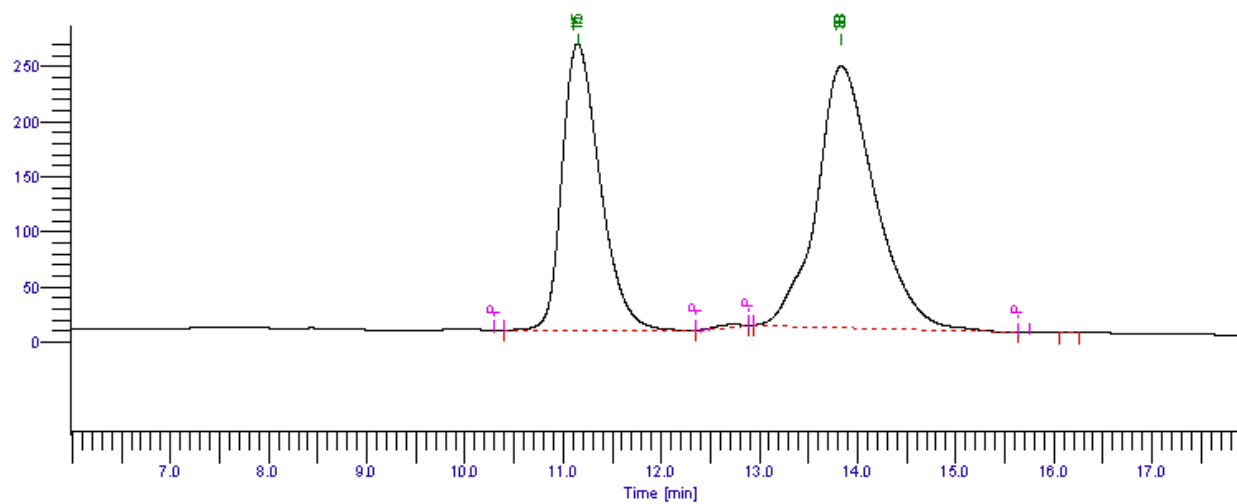

**Figure 94.** HPLC chromatogram of racemic compound **3w** (OD-H column; 95:5 Hexane–Isopropanol; 1 mL min<sup>-1</sup>)

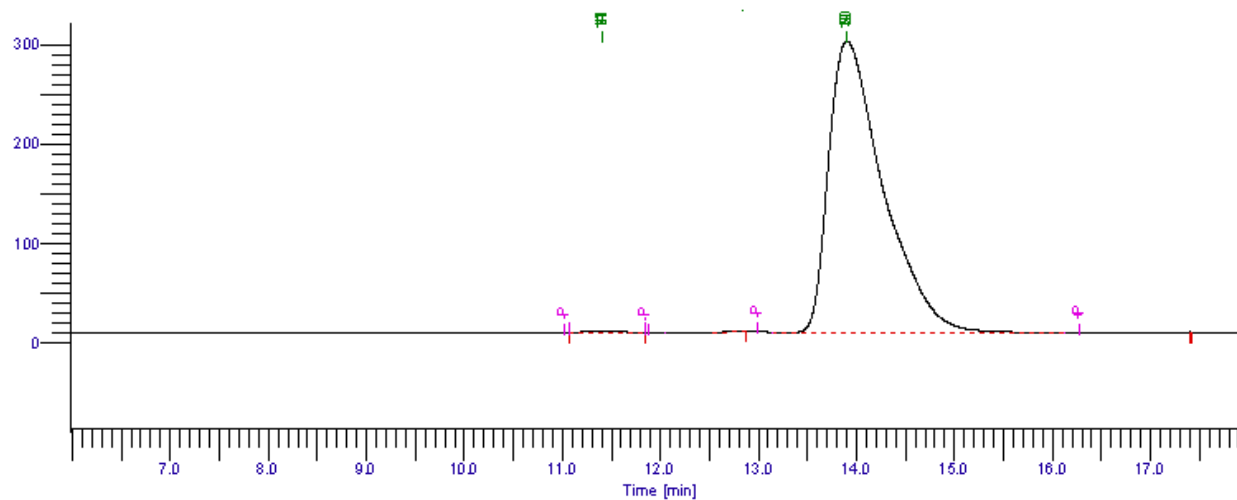

**Figure 95.** HPLC chromatogram of chiral compound **3w** (OD-H column; 95:5 Hexane–Isopropanol; 1 mL min<sup>-1</sup>) (ee >99%)

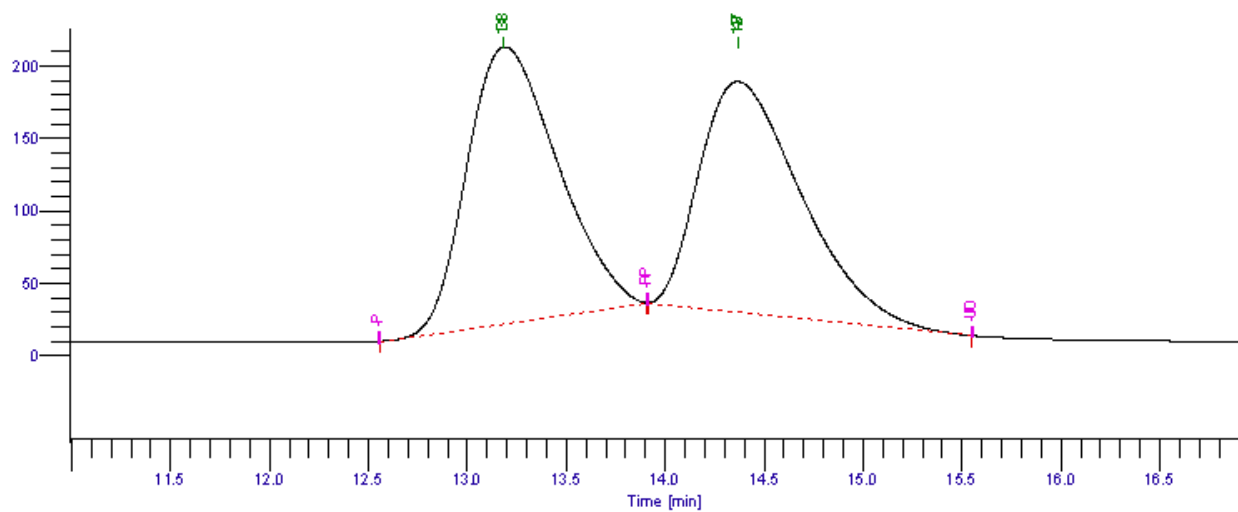

**Figure 96.** HPLC chromatogram of racemic compound **3x** (OD-H column; 95:5 Hexane–Isopropanol; 1 mL min<sup>-1</sup>)

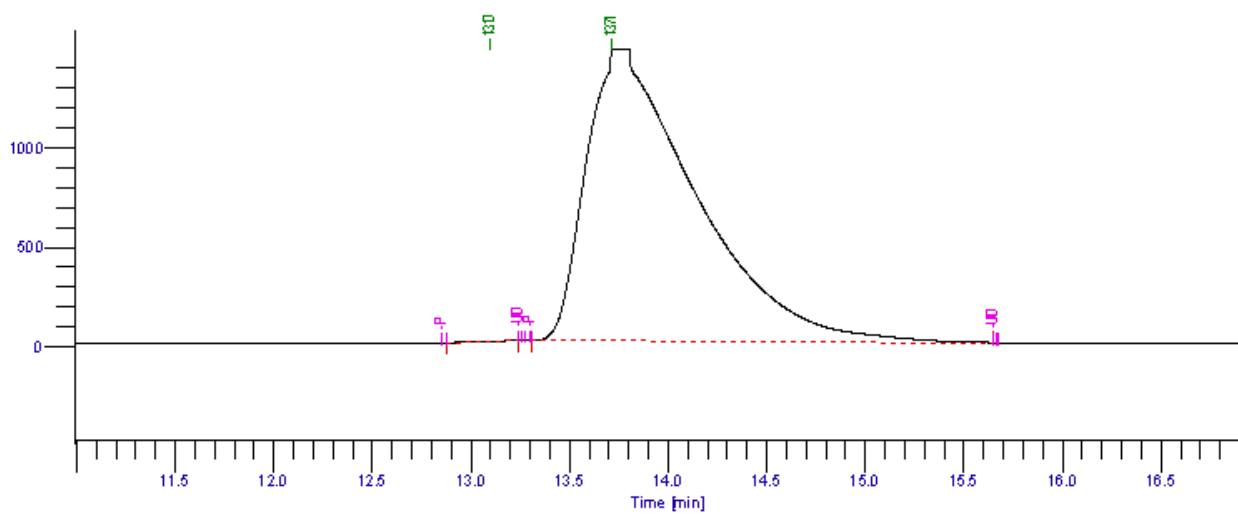

**Figure 97.** HPLC chromatogram of chiral compound **3x** (OD-H column; 95:5 Hexane–Isopropanol; 1 mL min<sup>-1</sup>) (ee >99%)

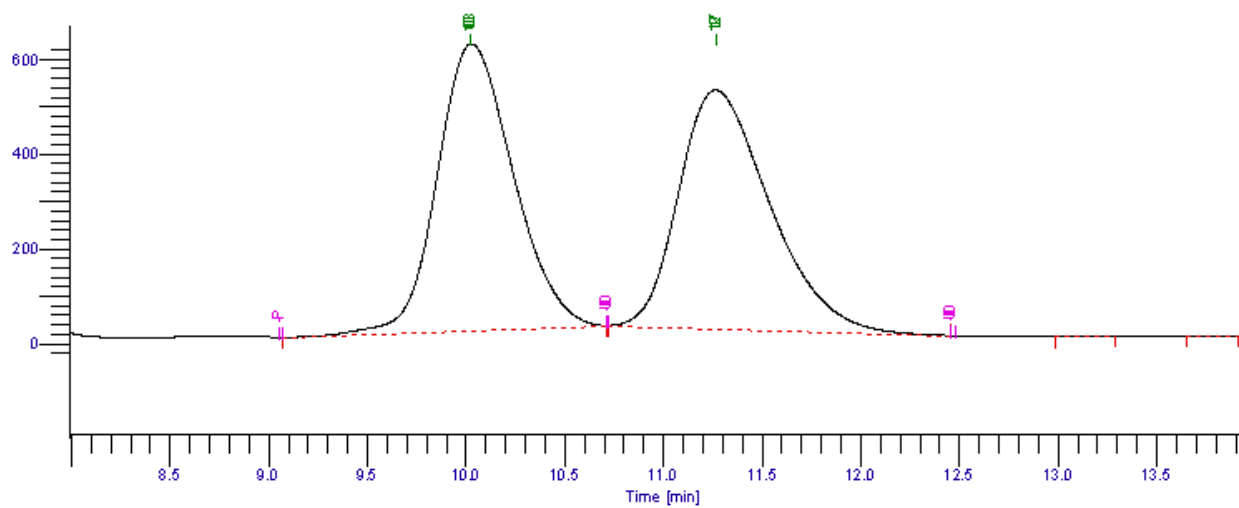

**Figure 98.** HPLC chromatogram of racemic compound **3y** (OD-H column; 95:5 Hexane–Isopropanol; 1 mL min<sup>-1</sup>)

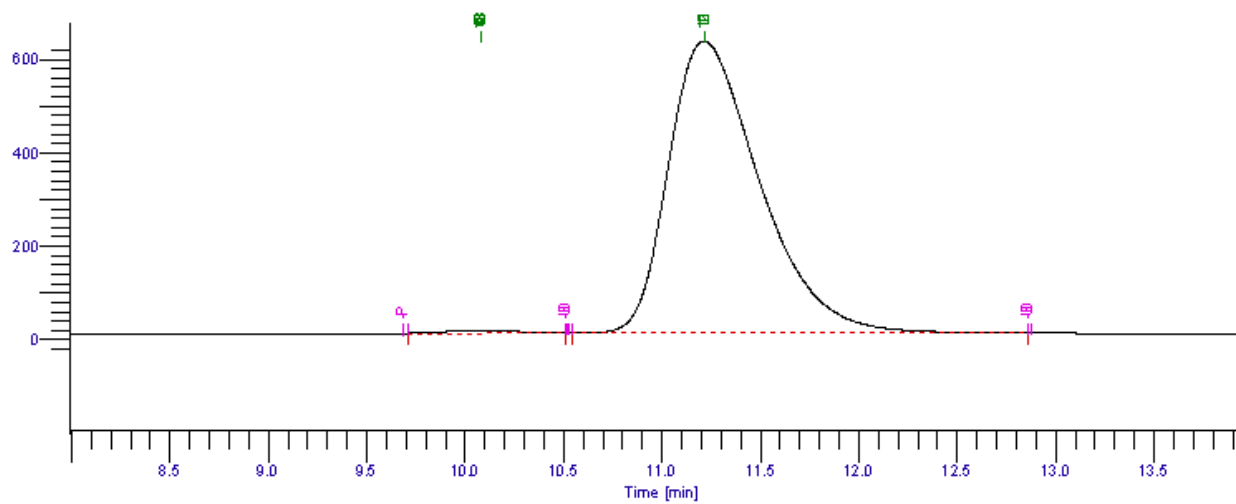

**Figure 99.** HPLC chromatogram of chiral compound **3y** (OD-H column; 95:5 Hexane–Isopropanol; 1 mL min) (ee 99%)

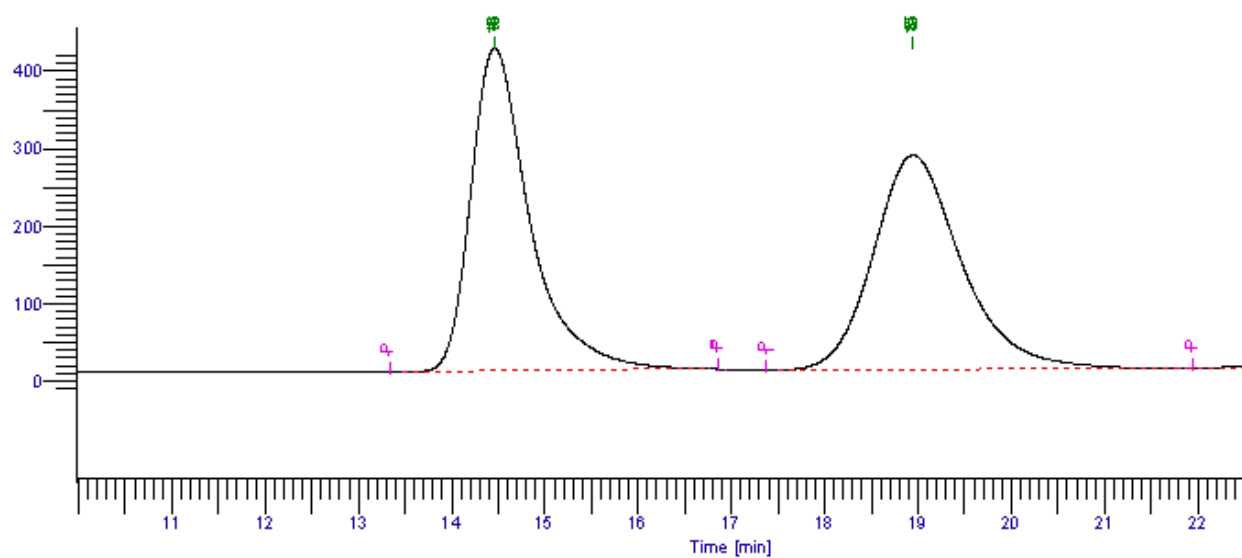

**Figure 100.** HPLC chromatogram of racemic compound **3z** (Cellulose 2 column; 95:5 Hexane–Isopropanol; 1 mL min<sup>-1</sup>)

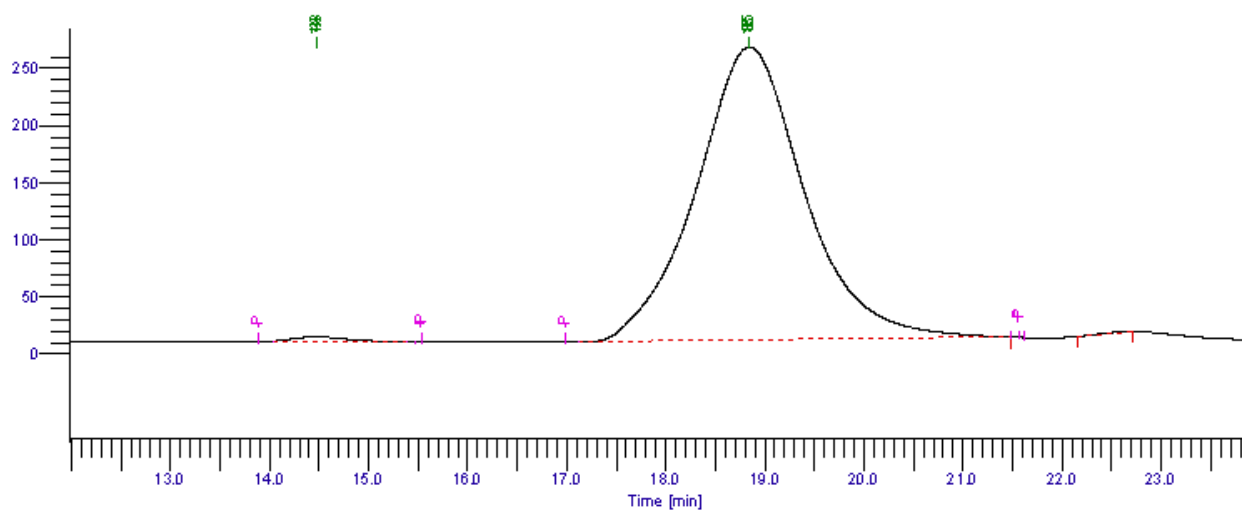

**Figure 101.** HPLC chromatogram of chiral compound **3z** (Cellulose 2 column; 95:5 Hexane–Isopropanol; 1 mL min<sup>-1</sup>) (ee 99%)

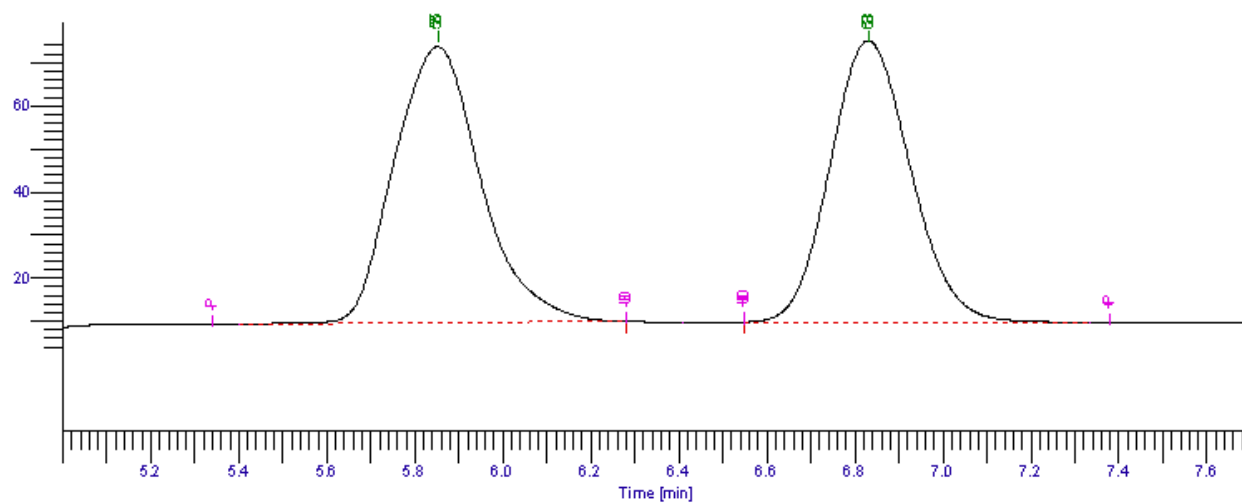

**Figure 102.** HPLC chromatogram of racemic compound **9a** (OD-H column; 95:5 Hexane–Isopropanol; 1 mL min<sup>-1</sup>)

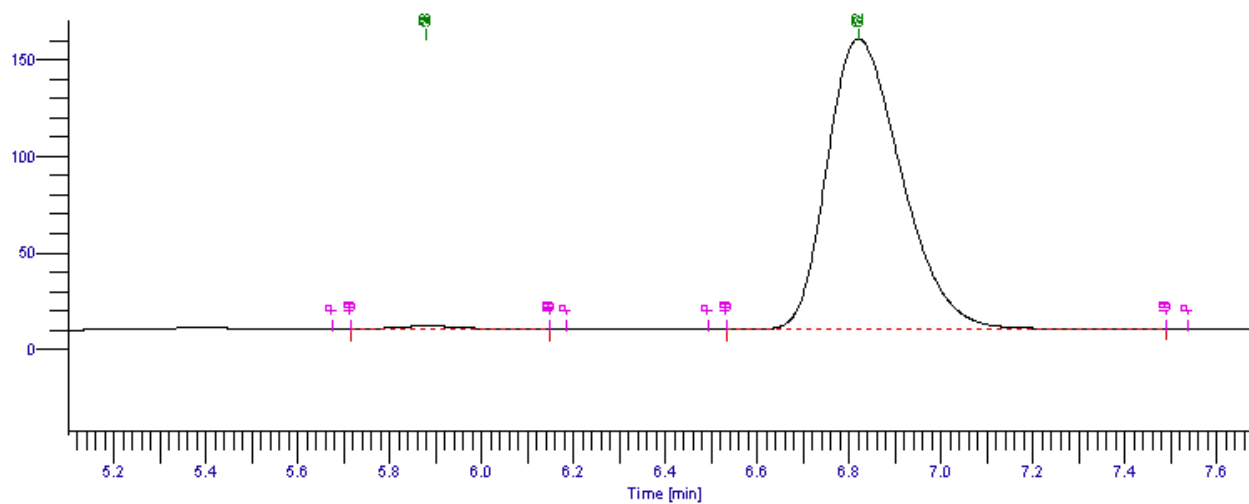

**Figure 103.** HPLC chromatogram of chiral compound **9a** (OD-H column; 95:5 Hexane–Isopropanol; 1 mL min<sup>-1</sup>) (ee 99)
